# Supplementary material for: Epidemiological and clinical features of human metapneumovirus in hospitalised paediatric patients with acute respiratory illness: a cross-sectional study in Southern China, from 2013 to 2016
Source: PubMed Central journal article supplement (PMC5829904; doi:10.1136/bmjopen-2017-019308), 2018-02-06
Supplement: bmjopen-2017-019308.draft_revisions.pdf [file bmjopen-2017-019308.draft_revisions.pdf]

# BMJ Open

BMJ Open is committed to open peer review. As part of this commitment we make the peer review history of every article we publish publicly available.

When an article is published we post the peer reviewers' comments and the authors' responses online. We also post the versions of the paper that were used during peer review. These are the versions that the peer review comments apply to.

The versions of the paper that follow are the versions that were submitted during the peer review process. They are not the versions of record or the final published versions. They should not be cited or distributed as the published version of this manuscript.

BMJ Open is an open access journal and the full, final, typeset and author-corrected version of record of the manuscript is available on our site with no access controls, subscription charges or pay-per-view fees (<http://bmjopen.bmj.com>).

If you have any questions on BMJ Open's open peer review process please email [editorial.bmjopen@bmj.com](mailto:editorial.bmjopen@bmj.com)

# BMJ Open

## Epidemiology and clinical features of human metapneumovirus in children hospitalized with acute respiratory tract infection from 2013 to 2016: a cross-sectional study

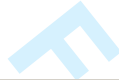

|                                 |                                                                                                                                                                                                                                                                                                                                                                                                                                                                                                                                                                                                                                                                                                                                                                                                                                                                                                                                                                                                                                                                                                                                                                                                                                                                                                                                                                                                                                                                                        |
|---------------------------------|----------------------------------------------------------------------------------------------------------------------------------------------------------------------------------------------------------------------------------------------------------------------------------------------------------------------------------------------------------------------------------------------------------------------------------------------------------------------------------------------------------------------------------------------------------------------------------------------------------------------------------------------------------------------------------------------------------------------------------------------------------------------------------------------------------------------------------------------------------------------------------------------------------------------------------------------------------------------------------------------------------------------------------------------------------------------------------------------------------------------------------------------------------------------------------------------------------------------------------------------------------------------------------------------------------------------------------------------------------------------------------------------------------------------------------------------------------------------------------------|
| Journal:                        | <i>BMJ Open</i>                                                                                                                                                                                                                                                                                                                                                                                                                                                                                                                                                                                                                                                                                                                                                                                                                                                                                                                                                                                                                                                                                                                                                                                                                                                                                                                                                                                                                                                                        |
| Manuscript ID                   | bmjopen-2017-019308                                                                                                                                                                                                                                                                                                                                                                                                                                                                                                                                                                                                                                                                                                                                                                                                                                                                                                                                                                                                                                                                                                                                                                                                                                                                                                                                                                                                                                                                    |
| Article Type:                   | Research                                                                                                                                                                                                                                                                                                                                                                                                                                                                                                                                                                                                                                                                                                                                                                                                                                                                                                                                                                                                                                                                                                                                                                                                                                                                                                                                                                                                                                                                               |
| Date Submitted by the Author:   | 24-Aug-2017                                                                                                                                                                                                                                                                                                                                                                                                                                                                                                                                                                                                                                                                                                                                                                                                                                                                                                                                                                                                                                                                                                                                                                                                                                                                                                                                                                                                                                                                            |
| Complete List of Authors:       | Zhang, Ling; State Key Laboratory of Respiratory Diseases, The First Affiliated Hospital of Guangzhou Medical University, Guangzhou Medical University<br>Liu, Donglan; State Key Laboratory of Respiratory Diseases, The First Affiliated Hospital of Guangzhou Medical University, Guangzhou Medical University<br>Chen, Dehui; Department of Pediatrics, The First Affiliated Hospital of Guangzhou Medical University, Guangzhou Medical University<br>Tan, Weiping ; Sun Yat-Sen Memorial Hospital, Sun Yat-Sen University<br>Qiu, Shuyan; State Key Laboratory of Respiratory Diseases, The First Affiliated Hospital of Guangzhou Medical University, Guangzhou Medical University<br>Xu, Duo; State Key Laboratory of Respiratory Diseases, The First Affiliated Hospital of Guangzhou Medical University, Guangzhou Medical University<br>Li, Xiao; State Key Laboratory of Respiratory Diseases, The First Affiliated Hospital of Guangzhou Medical University, Guangzhou Medical University<br>Liu, Tiantian; State Key Laboratory of Respiratory Diseases, The First Affiliated Hospital of Guangzhou Medical University, Guangzhou Medical University<br>Liu, Wenkuan; State Key Laboratory of Respiratory Diseases, The First Affiliated Hospital of Guangzhou Medical University, Guangzhou Medical University<br>Zhou, Rong; State Key Laboratory of Respiratory Diseases, The First Affiliated Hospital of Guangzhou Medical University, Guangzhou Medical University |
| <b>Primary Subject Heading</b>: | Infectious diseases                                                                                                                                                                                                                                                                                                                                                                                                                                                                                                                                                                                                                                                                                                                                                                                                                                                                                                                                                                                                                                                                                                                                                                                                                                                                                                                                                                                                                                                                    |
| Secondary Subject Heading:      | Epidemiology, Paediatrics, Infectious diseases                                                                                                                                                                                                                                                                                                                                                                                                                                                                                                                                                                                                                                                                                                                                                                                                                                                                                                                                                                                                                                                                                                                                                                                                                                                                                                                                                                                                                                         |
| Keywords:                       | Human metapneumovirus, Epidemiology, Clinical feature, Acute respiratory illness                                                                                                                                                                                                                                                                                                                                                                                                                                                                                                                                                                                                                                                                                                                                                                                                                                                                                                                                                                                                                                                                                                                                                                                                                                                                                                                                                                                                       |
|                                 |                                                                                                                                                                                                                                                                                                                                                                                                                                                                                                                                                                                                                                                                                                                                                                                                                                                                                                                                                                                                                                                                                                                                                                                                                                                                                                                                                                                                                                                                                        |

1  
2  
3  
4  
5  
6  
7  
8  
9  
10  
11  
12  
13  
14  
15  
16  
17  
18  
19  
20  
21  
22  
23  
24  
25  
26  
27  
28  
29  
30  
31  
32  
33  
34  
35  
36  
37  
38  
39  
40  
41  
42  
43  
44  
45  
46  
47  
48  
49  
50  
51  
52  
53  
54  
55  
56  
57  
58  
59  
60

SCHOLARONE™  
Manuscripts

For peer review only

1  
2  
3  
4 **1 Epidemiology and clinical features of human metapneumovirus in children**  
5  
6 **2 hospitalized with acute respiratory tract infection from 2013 to 2016: a**  
7  
8 **3 cross-sectional study**  
9  
10  
11  
12  
13  
14

15 Ling Zhang<sup>1†</sup>, Donglan Liu<sup>1†</sup>, Dehui Chen<sup>2</sup>, Weiping Tan<sup>3</sup>, Shuyan Qiu<sup>1</sup>, Duo Xu<sup>1</sup>, Xiao  
16  
17 Li<sup>1</sup>, Tiantian Liu<sup>1</sup>, Wenkuan Liu<sup>1\*</sup>, Rong Zhou<sup>1\*</sup>  
18  
19  
20  
21

22 <sup>1</sup>State Key Laboratory of Respiratory Diseases, The First Affiliated Hospital of  
23  
24 Guangzhou Medical University, Guangzhou Medical University, Guangzhou,  
25  
26 People's Republic of China.  
27  
28

29  
30 <sup>2</sup>Department of Pediatrics, The First Affiliated Hospital of Guangzhou Medical  
31  
32 University, Guangzhou Medical University, Guangzhou, People's Republic of China.  
33  
34

35 <sup>3</sup>Sun Yat-Sen Memorial Hospital, Sun Yat-Sen University, Guangzhou, People's  
36  
37 Republic of China.  
38  
39

40  
41  
42 \*Correspondence to Professor Rong Zhou; [zhourong@gird.cn](mailto:zhourong@gird.cn) and Wenkuan Liu;  
43  
44 [ahlwk2000-2004@163.com](mailto:ahlwk2000-2004@163.com);  
45  
46

47 <sup>†</sup>Ling Zhang, Donglan Liu contributed equally to this work.  
48  
49  
50  
51  
52  
53  
54  
55  
56  
57  
58  
59  
60

19 **Abstract**

20 **Objectives:** Human metapneumovirus (HMPV) is one of the most important  
21 respiratory viral pathogens among infants and children worldwide. To analyze  
22 epidemiologic and clinical characteristics of HMPV, patients hospitalized with acute  
23 respiratory illness (ARI) were studied in Guangzhou, southern China.

24 **Study design:** A cross-sectional study.

25 **Setting:** Two hospitals in Guangzhou.

26 **Participants and methods:** Throat swabs (n=5133) were collected and tested from  
27 pediatric patients ( $\leq 14$  years) hospitalized with ARI over a three-year period, and 101  
28 of 103 (98.1) HMPV-positive patients' clinical presentations were recorded for  
29 further analysis.

30 **Results:** Of the 5,133 patients, 103 (2.0%) were positive for HMPV. More frequency  
31 of HMPV infection occurred in patients  $\leq 5$  year-old (2.2%, 98/4399) than in patients  $> 5$   
32 year-old (0.7%, 5/734) ( $p=0.004$ ), and mostly distributed in children with the age  
33 groups of 3–6 months (2.4%, 10/423),  $> 6$ –12 months (2.2%, 30/1342),  $> 1$ –2 years  
34 (2.8%, 21/752) and  $> 2$ –5 years (2.3%, 32/1403) ( $p=0.865$ ). Two seasonal HMPV  
35 frequency peaks were found every year, and mainly occurred in spring and early  
36 summer. Nineteen of 103 (18.4%) HMPV-positive patients had co-infection with other  
37 pathogens, and most common co-pathogen was respiratory syncytial virus (36.8%,  
38 7/19). HMPV infection led to a wide spectrum of symptoms, and the main  
39 symptoms included cough (100.0%, 101/101), abnormal pulmonary breath sound  
40 (91.1%, 92/101), fever (88.1%, 89/101), expectoration (77.2%, 78/101), bronchopn-

1  
2  
3  
4 41 eumonia (55.4%, 56/101), coryza (50.5%, 51/101) and wheezing (46.5%, 47/101).

5  
6 42 More fever ( $\geq 38^{\circ}\text{C}$ ) cases (71.6%, 76/83) were found among mono-infected patients

7  
8  
9 43 than co-infected patients (72.2%, 13/18) ( $p=0.037$ ). While diarrhea was found more

10  
11 44 frequently in HMPV co-infected patients (22.2%, 4/18) than mono-infected patients

12  
13 45 (3.6%, 3/83) ( $p=0.018$ ).

14  
15  
16 46 **Conclusions:** This study provides valuable insight into HMPV epidemiology and

17  
18 47 clinical characteristics, which may be helpful in the control and prevention of infectious

19  
20  
21 48 diseases.

22  
23  
24 49

25  
26 50 **Strengths and limitations of this study**

27  
28 51 1 .The study investigate the epidemiological and clinical features of human

29  
30 52 metapneumovirus (HMPV) infection in pediatric patients hospitalized with acute

31  
32 53 respiratory illness, which may aid in diagnosis, control and prevention of infectious

33  
34 54 diseases.

35  
36 55 2. The study of relatively large sample size is helpful to the accurate study of HMPV

37  
38 56 characteristics.

39  
40 57 3. The study had some limitations: the characteristics of HMPV-negative patients were

41  
42 58 not further analyzed, and bacterial pathogens were not detected in HMPV-infection

43  
44 59 patients. These defects may affect our comprehensive understanding of HMPV

45  
46 60 infection in epidemiological and clinical features.

## 61 Introduction

62 Human metapneumovirus (HMPV) is a nonsegmented, negative-sense  
63 single-stranded RNA virus, which belongs to the *Paramyxoviridae* family,  
64 *Pneumovirinae* subfamily, and *Metapneumovirus* genus.<sup>1</sup> HMPV was first discovered  
65 in 2001 in the Netherlands and was isolated from a pediatric patient with acute  
66 respiratory illness (ARI).<sup>2</sup> Since then, HMPV has been associated with acute  
67 respiratory disease in individuals of all ages worldwide, but it is more common in  
68 children, elderly, and immunocompromised adults.<sup>3-5</sup> Young children aged  $\leq 5$  years  
69 seem to be particularly susceptible to HMPV infection. In previous studies,<sup>6-12</sup> which  
70 mostly detected in developed countries, approximately 2.5–11.3% of respiratory  
71 samples were positive for HMPV in children  $\leq 5$  years and 90% of individuals have  
72 positive serology for HMPV by 5 years of age.<sup>13</sup>

73 HMPV causes a variety of clinical symptoms ranging from a mild upper  
74 respiratory tract infection (URTI) to life-threatening lower respiratory tract infection  
75 (LRTI).<sup>3 14-16</sup> And until now, there is no effective vaccine and drug treatment for HMPV.  
76 Thus, more studies are needed all over the world, especially in developing countries,  
77 where only a limited number of reports about HMPV.

78 In this study, we investigated the epidemiological and clinical features of HMPV  
79 infection in pediatric patients ( $\leq 14$  years) hospitalized with ARI in Guangzhou,  
80 southern China, between July 2013 and June 2016 using real-time PCR. The findings  
81 of this study will be helpful in understanding the distribution of HMPV in subtropical  
82 region and providing the data for developing effective control and prevention

1  
2  
3  
4 83 strategies. Our results also provide valuable insight into the clinical features of HMPV,  
5  
6 84 which will be helpful in early clinical diagnosis.  
7  
8  
9  
10  
11  
12  
13  
14  
15  
16  
17  
18  
19  
20  
21  
22  
23  
24  
25  
26  
27  
28  
29  
30  
31  
32  
33  
34  
35  
36  
37  
38  
39  
40  
41  
42  
43  
44  
45  
46  
47  
48  
49  
50  
51  
52  
53  
54  
55  
56  
57  
58  
59  
60

For peer review only



## 85 **Methods**

### 86 **Study design and respiratory sample collection**

87 This was a cross-sectional study at The First Affiliated Hospital of Guangzhou  
88 Medical University and Sun Yat-Sen Memorial Hospital in Guangzhou. Samples in this  
89 study were taken as part of standard care. Throat swab samples (n=5133) from  
90 pediatric patients ( $\leq 14$  years) hospitalized with ARI (presenting with at least two of the  
91 following symptoms: cough, pharyngeal discomfort, nasal obstruction, coryza, sneeze,  
92 dyspnoea or diagnosed with pneumonia by chest radiography during the previous  
93 week) were collected at two hospitals between July 2013 and June 2016. The  
94 samples were collected with established clinical protocols.<sup>17</sup> The samples were  
95 refrigerated at 2–8°C in viral transport medium, transported on ice to the State Key  
96 Laboratory of Respiratory Diseases, and analyzed immediately or stored at -80°C  
97 before analysis as previously described.<sup>18</sup>

98 The patients' clinical symptoms were extracted from their medical records  
99 using designed presentation cards and were retrospectively categorized into the  
100 following four groups: URTI, LRTI, systemic influenza-like symptoms, and  
101 gastrointestinal illness. Patients with nasal obstruction, coryza, sneezing, coughing,  
102 pharyngeal discomfort, or hoarseness were categorized as having URTI. Patients with  
103 pneumonia, bronchiolitis, increased lung markings, dyspnea, or an abnormal  
104 pulmonary breath sound were categorized as having LRTI. Patients with high fever  
105 ( $\geq 38^\circ\text{C}$ ), chills, dizziness, headache, myalgia, or debility were categorized as having  
106 systemic influenza-like symptoms. Patients with vomiting, poor appetite, or diarrhea

1  
2  
3  
4 107 were categorized as having gastrointestinal illness. Some patients were assigned to  
5  
6 108 several clinical presentation groups. Patients with incomplete clinical data were  
7  
8  
9 109 excluded from this analysis. Increased lung markings, bronchopneumonia,  
10  
11 110 pneumonia, and bronchiolitis were diagnosed by chest radiography. Abnormal  
12  
13 111 pulmonary breath sounds included phlegmatic rales, wheezy rales, bubbling rales,  
14  
15 112 and moist rales. Other clinical symptoms were identified by a general medical  
16  
17 113 examination and clinical descriptions as previously reported.<sup>19</sup>  
18  
19  
20  
21  
22  
23

114

#### 115 **Real-time RT-PCR for HMPV detection**

24  
25  
26 116 RNA were extracted from the respiratory samples with the QIAamp Viral RNA  
27  
28 117 Mini Kit (Qiagen, Shanghai, China), respectively, according to the manufacturer's  
29  
30 118 protocols. HMPV was determined by using TaqMan Real-time PCR assays, as  
31  
32 119 previously reported,<sup>18</sup> using kits from Guangzhou HuYanSuo Medical Technology Co.,  
33  
34 120 Ltd according to the manufacturer's protocols.  
35  
36  
37  
38  
39  
40

121

#### 122 **Detection of common respiratory pathogens in HMPV-positive patients**

41  
42  
43 123 HMPV-positive samples were simultaneously tested by using TaqMan Real-time  
44  
45 124 PCR assays for the following 17 respiratory pathogens : respiratory syncytial virus  
46  
47 125 (RSV), parainfluenza virus types 1–4 (PIV1–4), influenza A and B viruses (InfA, InfB),  
48  
49 126 adenovirus (ADV), enterovirus (EV), human coronaviruses (HCoV-229E, HCoV-OC43,  
50  
51 127 HCoV-NL63, HCoV-HKU1), human rhinovirus (HRV), human bocavirus (HBoV),  
52  
53  
54  
55 128 *Mycoplasma pneumoniae* (MP), and *Chlamydomphila pneumoniae* (CP). The testing  
56  
57  
58  
59  
60

1  
2  
3  
4 129 procedure was conducted using kits from Guangzhou HuYanSuo Medical Technology  
5  
6 130 Co., Ltd as previously described.<sup>18</sup>  
7  
8

9 131

10  
11 132 **Statistical analysis**

12  
13 133 All statistical analyses were performed with SPSS statistical software (version  
14  
15  
16 134 19.0; SPSS Inc., Chicago, IL, USA). To compare categorical data, the  $\chi^2$  test and  
17  
18  
19 135 Fisher's exact test were used as appropriate. All tests were two-tailed, and  $p < 0.05$   
20  
21 136 was considered statistically significant.  
22  
23  
24  
25  
26  
27  
28  
29  
30  
31  
32  
33  
34  
35  
36  
37  
38  
39  
40  
41  
42  
43  
44  
45  
46  
47  
48  
49  
50  
51  
52  
53  
54  
55  
56  
57  
58  
59  
60

## 137 **Results**

### 138 **Detection of HMPV from patients with ARI**

139 In total, 5133 pediatric patients ( $\leq 14$  years) hospitalized with ARI between July  
140 2013 and June 2016 were enrolled in this study. The male-to-female ratio was 1.75  
141 (3269:1864) and the median age was 2.76 years (interquartile range, 0.75–4.00  
142 years). Of the 5133 patients, 103 (2.0%) were positive for HMPV. The male-to-female  
143 ratio was 1.86:1 (67:36) in HMPV-positive patients and 1.75:1 (3202:1828) in  
144 HMPV-negative patients ( $p=0.771$ ). The median age of HMPV-positive patients was  
145 1.95 years (interquartile range, 0.83–3.00 years).

### 147 **Co-infection with common respiratory pathogens**

148 In this study, we tested HMPV-positive patients for 17 other common  
149 respiratory pathogens. Of the 103 HMPV-positive patients, 84 (81.6%) patients had  
150 HMPV mono-infection and 19 (18.4%) patients had HMPV co-infection with  $\geq 1$  other  
151 pathogen. The male-to-female ratio was 2:1 (56:28) in HMPV mono-infected patients  
152 and 1.38:1 (11:8) in HMPV co-infected patients ( $p=0.469$ ). Nine of these 17 pathogens  
153 (52.9%) were detected, and the most frequent co-pathogens were RSV (36.8%, 7/19),  
154 HCoV-OC43 (15.8%, 3/19), MP (15.8%, 3/19), and HBoV (15.8%, 3/19) (**Table 1**).

### 156 **Age distributions of HMPV-positive patients**

157 Overall, a significant difference were found between the distribution of  
158 HMPV-positive patients aged  $>5$ –14 years (0.7%, 5/734) and those aged  $\leq 5$  years

1  
2  
3  
4 159 (2.2%, 98/4399) ( $p=0.004$ ), for detail, the patients were divided into six age groups:  
5  
6 160 0–3 months, >3–6 months, >6–12 months, >1–2 years, >2–5 years, and >5–14 years.  
7  
8  
9 161 The distribution of HMPV-infected patients in each group was significantly different  
10  
11 162 ( $p=0.03$ ) (**Figure 1**). HMPV infection most frequently occurred in children aged >1–2  
12  
13  
14 163 years (2.8%, 21/752) (**Figure 1**). However, there were no significant difference in  
15  
16 164 frequency of HMPV infection among patients aged >1–2 years, >3–6 months (2.4%,  
17  
18 165 10/423), >6–12 months (2.2%, 30/1342), and >2–5 years (2.3%, 32/1403) ( $p=0.865$ ).  
19  
20  
21 166

### 22 23 24 167 **Seasonal distribution of HMPV infection**

25  
26 168 In general, the frequency of HMPV infections peaked twice every year (**Figure**  
27  
28 169 **2**). Large peaks in the HMPV detection rate occurred in March 2014 (8%, 16/200),  
29  
30  
31 170 May 2015 (7.6%, 8/105), and February 2016 (8.7%, 9/103). Small peaks in the HMPV  
32  
33  
34 171 detection rates occurred in November 2014 (1.7%, 2/121), September 2015 (2.8%,  
35  
36 172 2/72), and May 2016 (1.5%, 2/135) (**Figure 2**).  
37  
38  
39 173

### 40 41 174 **Clinical presentations of HMPV-positive patients**

42  
43  
44 175 We analyzed the clinical presentations of 101 of 103 (98.1%) HMPV-positive  
45  
46 176 patients. Patients with incomplete clinical data were excluded from this analysis ( $n=2$ ).  
47  
48  
49 177 The main symptoms of HMPV infection included cough (100.0%, 101/101), abnormal  
50  
51 178 pulmonary breath sound (91.1%, 92/101), fever (88.1%, 89/101), expectoration  
52  
53  
54 179 (77.2%, 78/101), bronchopneumonia (55.4%, 56/101), coryza (50.5%, 51/101) and  
55  
56 180 wheezing (46.5%, 47/101) (**Table 2**). We also compared the clinical features of  
57  
58  
59  
60

1  
2  
3  
4 181 patients with HMPV mono-infection and co-infections, and significant differences were  
5  
6 182 found in patients with fever ( $\geq 38^{\circ}\text{C}$ ) ( $p=0.037$ ) and diarrhea ( $p=0.018$ ), which  
7  
8  
9 183 observed in 91.6% (76/83), 3.6% (3/83) patients with single infection and 72.2%  
10  
11 184 (13/18), 22.2% (4/18) patients with co-infection, respectively (**Table 2**).

12  
13  
14  
15  
16  
17  
18  
19  
20  
21  
22  
23  
24  
25  
26  
27  
28  
29  
30  
31  
32  
33  
34  
35  
36  
37  
38  
39  
40  
41  
42  
43  
44  
45  
46  
47  
48  
49  
50  
51  
52  
53  
54  
55  
56  
57  
58  
59  
60

For peer review only

1  
2  
3  
4 185 **Discussion**

5  
6 186 Viruses are the most frequent cause of respiratory infection.<sup>20</sup> HMPV has been  
7  
8  
9 187 recognized as an important respiratory pathogen causing ARI since its discovery in  
10  
11 188 2001. It has been reported that HMPV was responsible for approximately 5–10% of  
12  
13  
14 189 hospitalizations of children suffering from ARI,<sup>14</sup> which has led to considerable clinical  
15  
16 190 and economic burden worldwide. HMPV detection rates vary according to geographic  
17  
18  
19 191 location, and the incidence of HMPV may show seasonal or annual patterns in the  
20  
21 192 same area. In previous studies,<sup>21-30</sup> the HMPV detection rate was approximately  
22  
23  
24 193 1–17% of ARI. In this 3-year study, 103 of 5133 (2.0%) patients were positive for  
25  
26 194 HMPV, which is similar to previous reports of HMPV in patients with ARI in southern  
27  
28  
29 195 China<sup>31</sup> and Japan.<sup>32</sup>

30  
31 196 HMPV is commonly found in the pediatric population, with children under 5  
32  
33  
34 197 year-old most susceptible to and children under 2 year-old at the greatest risk for  
35  
36 198 serious HMPV infections.<sup>15</sup> In our study, more frequency of HMPV infection occurred  
37  
38  
39 199 in patients  $\leq 5$  year-old (2.2%, 98/4399) than in patients  $> 5$  year-old (0.7%, 5/734)  
40  
41 200 ( $p=0.004$ ), which is consistent with most previous studies.<sup>3 30 33 34</sup> In detail, HMPV  
42  
43  
44 201 infection were found high frequency in children with the age groups of 3–6  
45  
46 202 months,  $> 6$ –12 months,  $> 1$ –2 years and  $> 2$ –5 years ( $p=0.865$ ) (**Figure 1**). Therefore,  
47  
48  
49 203 children of this age need more attention to prevent HMPV infection. Moreover, our  
50  
51 204 findings suggested a male predominance, there was no significant difference in the  
52  
53  
54 205 HMPV positivity rate between males and females ( $p=0.771$ ), which is consistent with  
55  
56 206 previous studies.<sup>35 36</sup>

1  
2  
3  
4 207 HMPV has a typical seasonal distribution. The activity of HMPV is largely  
5  
6 208 affected by different climate factors, which are locally present. The activity of HMPV in  
7  
8  
9 209 temperate climates peaks at the end of winter or in early spring.<sup>37 38</sup> In this study,  
10  
11 210 seasonal peaks of HMPV infection were detected in February 2016, March 2014, and  
12  
13 211 May 2015 (**Figure 2**). This finding indicates that in Guangzhou, HMPV circulates  
14  
15 212 primarily during the spring and early summer, as previously reported in other  
16  
17  
18 213 subtropical areas.<sup>22 39</sup> Furthermore, we also found small peaks in November 2014,  
19  
20 214 September 2015, and May 2016 (**Figure 2**). Generally, the seasonal distribution  
21  
22 215 pattern of HMPV overlaps that of RSV in this area.<sup>19</sup> These data might be useful for  
23  
24 216 control and prevention strategies of HMPV.

25  
26  
27  
28 217 HMPV co-infection with other respiratory pathogens has been reported in  
29  
30 218 many studies, including RSV,<sup>40</sup> InfA,<sup>41</sup> InfB,<sup>42</sup> PIV,<sup>43</sup> ADV,<sup>43 44</sup> HBoV,<sup>45</sup> HCoV,<sup>43 46</sup> RV,<sup>43</sup>  
31  
32 219 EV,<sup>43</sup> MP,<sup>41</sup> and CP.<sup>41</sup> In this study, most HMPV-positive patients had mono-infection  
33  
34 220 (81.6%, 84/103), and there was no significant difference in the HMPV positivity rate  
35  
36 221 according to sex between HMPV mono- and co-infected patients ( $p=0.469$ ). The  
37  
38 222 co-infection rate was 18.4% (19/103), and the most frequently detected co-pathogen  
39  
40 223 was RSV (36.8%, 7/19) (**Table 1**), which might be due to the overlapping seasonal  
41  
42 224 distribution of HMPV and RSV.<sup>47</sup> Co-infection with HCoV-OC43, MP, HBoV, ADV, RV,  
43  
44 225 InfA, PIV2, and PIV3 occurred at rates >5%, suggesting a broad range of  
45  
46 226 co-pathogens in HMPV infection (**Table 1**).

47  
48  
49 227 HMPV most commonly causes URTI and LRTI in young children. The clinical  
50  
51 228 manifestations of HMPV infection are similar to those of RSV infection, especially in  
52  
53  
54  
55  
56  
57  
58  
59  
60



1  
2  
3  
4 229 young children,<sup>48-50</sup> and HMPV has been reported that the most frequent diagnoses of  
5  
6 230 children hospitalized with HMPV infection were pneumonitis and bronchiolitis.<sup>3 51 52</sup> In  
7  
8  
9 231 some studies, bronchiolitis and recurrent wheezing/pneumonia were the main clinical  
10  
11 232 diagnosis,<sup>7 22 53 54</sup> while in other studies, bronchopneumonia, bronchiolitis, and  
12  
13  
14 233 bronchial asthma exacerbation were the main clinical diagnosis.<sup>34</sup> In this study, we  
15  
16 234 analyzed the clinical presentations of 101 HMPV-positive patients (**Table 2**), and  
17  
18  
19 235 55.4%, 7.9%, and 10.9% of patients were diagnosed with bronchopneumonia,  
20  
21 236 bronchiolitis, and pneumonia by chest radiography, respectively. Of all clinical  
22  
23  
24 237 presentations, cough (100.0%), abnormal pulmonary breath sound (91.1%), fever  
25  
26 238 (88.1%), expectoration (77.2%), bronchopneumonia (55.4%), coryza (50.5%), and  
27  
28  
29 239 wheezing (46.5%) occurred frequently in HMPV-positive patients (Table 2), similar to  
30  
31 240 those reported previously.<sup>16 29 52 55</sup>

32  
33  
34 241 When we compared the clinical features between HMPV mono- and  
35  
36 242 co-infected patients, more fever cases ( $p=0.037$ ) were found among mono-infected  
37  
38  
39 243 patients than co-infected patients, suggesting that fever was the key clinical  
40  
41 244 presentation caused by HMPV infection (**Table 2**). Diarrhea was found more  
42  
43  
44 245 frequently in HMPV co-infected patients than mono-infected patients ( $p=0.018$ ),  
45  
46 246 suggested that diarrhea is not the main manifestation of HMPV infection, but may be  
47  
48  
49 247 caused by other pathogens. No significant difference was found in the other clinical  
50  
51 248 presentations between HMPV mono- and co-infected patients, similar to the results of  
52  
53  
54 249 a previous study.<sup>51</sup> In this study, most frequent co-pathogen in HMPV-positive patients  
55  
56 250 were RSV (36.8%) (**Table 1**). Whether HMPV/RSV co-infection is more severe than  
57  
58  
59  
60

1  
2  
3  
4 251 the respective mono-infections remains unclear. A previous study showed that  
5  
6 252 children with HMPV/RSV co-infection were more likely to develop pneumonia,  
7  
8  
9 253 however, disease severity was not increased.<sup>53</sup> Conversely, Semple et al.<sup>56</sup> reported  
10  
11 254 that HMPV/RSV co-infection can cause more severe bronchiolitis in patients. In our  
12  
13  
14 255 study, no significant difference in the pneumonia rate was observed between HMPV  
15  
16 256 mono- and co-infected patients. It has been confirmed that a history of prematurity,  
17  
18  
19 257 particular age groups, and the presence of chronic diseases increases the risk of  
20  
21 258 severe LRTI among HMPV- and RSV-infected children.<sup>51</sup> The clinical manifestations  
22  
23  
24 259 of HMPV infection are complex and diverse; the data in this work might be helpful in  
25  
26 260 the diagnosis of HMPV. In this study, the characteristics of HMPV-negative patients  
27  
28  
29 261 were not further analyzed, and bacterial pathogens were not detected in  
30  
31 262 HMPV-infection patients. These defects may affect our comprehensive understanding  
32  
33  
34 263 of HMPV infection in epidemiological and clinical features.  
35  
36  
37  
38  
39  
40  
41  
42  
43  
44  
45  
46  
47  
48  
49  
50  
51  
52  
53  
54  
55  
56  
57  
58  
59  
60

1  
2  
3  
4 264 **Conclusions**  
5

6 265 In this study, we analyzed the epidemiology and clinical manifestations of  
7  
8  
9 266 HMPV infection in hospitalized children under 14 years old over a three-year period in  
10  
11 267 Guangzhou, China. Our results provide valuable insight into the epidemiology and  
12  
13 268 clinical features of HMPV infection in subtropical region, which may be helpful in  
14  
15  
16 269 diagnosis, prevention of HMPV infection.  
17  
18  
19  
20  
21  
22  
23  
24  
25  
26  
27  
28  
29  
30  
31  
32  
33  
34  
35  
36  
37  
38  
39  
40  
41  
42  
43  
44  
45  
46  
47  
48  
49  
50  
51  
52  
53  
54  
55  
56  
57  
58  
59  
60

1  
2  
3  
4 270 **Acknowledgements**  
5

6 271 We thank the study volunteers for their generous participation. We thank Yinghua  
7  
8 272 Zhou, Haiping Huang, Jing Zhang, Jing Ma for technical assistance. We thank  
9  
10 273 Professor Xiaofeng Li and Dr. Zhengshi Lin for paper polishing.  
11  
12  
13

14 274

15  
16 275 **Contributors**  
17

18 276 RZ, WKL, LZ and DLL designed the study. LZ, DLL, WKL, SYQ, DX, XL and LTT  
19  
20 277 performed pathogen testing. DHC and WPT collected clinical data. All authors  
21  
22 278 participated in the data analysis. LZ, DLL, RZ and WKL drafted the manuscript. All  
23  
24 279 authors read and approved the final version of this manuscript.  
25  
26  
27

28 280

29  
30  
31 281 **Funding**  
32

33 282 This study was supported by The State Major Infectious Disease Research Program  
34  
35 283 (RZ) (2017ZX10103011-003), National Natural Science Foundation of China (WKL)  
36  
37 284 (31500143), Guangzhou Science and Technology Program key projects (RZ)  
38  
39 285 (201508020252). The funders had no role in study design, data collection and  
40  
41 286 analysis, decision to publish, or preparation of the manuscript.  
42  
43  
44

45 287

46  
47  
48 288 **Competing interests**  
49

50 289 None declared.  
51  
52

53 290

54  
55  
56 291 **Ethics approval**  
57  
58  
59  
60

1  
2  
3  
4  
5  
6  
7  
8  
9  
10  
11  
12  
13  
14  
15  
16  
17  
18  
19  
20  
21  
22  
23  
24  
25  
26  
27  
28  
29  
30  
31  
32  
33  
34  
35  
36  
37  
38  
39  
40  
41  
42  
43  
44  
45  
46  
47  
48  
49  
50  
51  
52  
53  
54  
55  
56  
57  
58  
59  
60

292 The study was approved by The First Affiliated Hospital of Guangzhou Medical  
293 University Ethics Committee. Informed written consent was obtained from parents or  
294 legal guardians.

295

296 **Data sharing statement**

297 No additional data are available.

For peer review only

## 298 REFERENCES

- 299 1. van den Hoogen BG, Herfst S, Sprong L, et al. Antigenic and genetic variability of human  
300 metapneumoviruses. *Emerg Infect Dis* 2004;10(4):658-66. doi: 10.3201/eid1004.030393
- 301 2. van den Hoogen BG, de Jong JC, Groen J, et al. A newly discovered human pneumovirus  
302 isolated from young children with respiratory tract disease. *Nat Med* 2001;7(6):719-24. doi:  
303 10.1038/89098
- 304 3. Boivin G, Abed Y, Pelletier G, et al. Virological features and clinical manifestations associated  
305 with human metapneumovirus: a new paramyxovirus responsible for acute respiratory-tract  
306 infections in all age groups. *J Infect Dis* 2002;186(9):1330-4. doi: 10.1086/344319
- 307 4. Falsey AR, Walsh EE. Viral pneumonia in older adults. *Clin Infect Dis* 2006;42(4):518-24. doi:  
308 10.1086/499955
- 309 5. Kahn JS. Epidemiology of human metapneumovirus. *Clin Microbiol Rev* 2006;19(3):546-57.  
310 doi: 10.1128/CMR.00014-06
- 311 6. Davis CR, Stockmann C, Pavia AT, et al. Incidence, Morbidity, and Costs of Human  
312 Metapneumovirus Infection in Hospitalized Children. *J Pediatric Infect Dis Soc*  
313 2016;5(3):303-11. doi: 10.1093/jpids/piv027
- 314 7. Edwards KM, Zhu Y, Griffin MR, et al. Burden of human metapneumovirus infection in  
315 young children. *N Engl J Med* 2013;368(7):633-43. doi: 10.1056/NEJMoa1204630
- 316 8. Foulongne V, Guyon G, Rodiere M, et al. Human metapneumovirus infection in young  
317 children hospitalized with respiratory tract disease. *Pediatr Infect Dis J* 2006;25(4):354-9. doi:  
318 10.1097/01.inf.0000207480.55201.f6
- 319 9. Heikkinen T, Osterback R, Peltola V, et al. Human metapneumovirus infections in children.  
320 *Emerg Infect Dis* 2008;14(1):101-6. doi: 10.3201/eid1401.070251
- 321 10. Nicholson KG, McNally T, Silverman M, et al. Rates of hospitalisation for influenza,  
322 respiratory syncytial virus and human metapneumovirus among infants and young children.  
323 *Vaccine* 2006;24(1):102-8. doi: 10.1016/j.vaccine.2005.02.004
- 324 11. Sloots TP, Mackay IM, Bialasiewicz S, et al. Human metapneumovirus, Australia, 2001-2004.  
325 *Emerg Infect Dis* 2006;12(8):1263-6. doi: 10.3201/eid1208.051239
- 326 12. Williams JV, Edwards KM, Weinberg GA, et al. Population-based incidence of human  
327 metapneumovirus infection among hospitalized children. *J Infect Dis* 2010;201(12):1890-8.  
328 doi: 10.1086/652782
- 329 13. Ebihara T, Endo R, Kikuta H, et al. Seroprevalence of human metapneumovirus in Japan. *J*  
330 *Med Virol* 2003;70(2):281-3. doi: 10.1002/jmv.10391
- 331 14. Panda S, Mohakud NK, Pena L, et al. Human metapneumovirus: review of an important  
332 respiratory pathogen. *Int J Infect Dis* 2014;25:45-52. doi: 10.1016/j.ijid.2014.03.1394
- 333 15. Broor S, Bharaj P, Chahar HS. Human metapneumovirus: a new respiratory pathogen. *J*  
334 *Biosci* 2008;33(4):483-93.
- 335 16. Jain B, Singh AK, Dangi T, et al. High prevalence of human metapneumovirus subtype B in  
336 cases presenting as severe acute respiratory illness: an experience at tertiary care hospital. *Clin*  
337 *Respir J* 2014;8(2):225-33. doi: 10.1111/crj.12064
- 338 17. Liu WK, Liu Q, Chen DH, et al. Epidemiology and clinical presentation of the four human  
339 parainfluenza virus types. *BMC Infect Dis* 2013;13:28. doi: 10.1186/1471-2334-13-28
- 340 18. Liu WK, Chen DH, Liu Q, et al. Detection of human bocavirus from children and adults with  
341 acute respiratory tract illness in Guangzhou, southern China. *BMC Infect Dis* 2011;11:345. doi:

- 1  
2  
3 342 10.1186/1471-2334-11-345  
4 343 19. Liu W, Chen D, Tan W, et al. Epidemiology and Clinical Presentations of Respiratory  
5 344 Syncytial Virus Subgroups A and B Detected with Multiplex Real-Time PCR. *PLoS One*  
6 345 2016;11(10):e0165108. DOI: 10.1371/journal.pone.08. doi: 10.1371/journal.pone.0165108  
7 346 20. Williams BG, Gouws E, Boschi-Pinto C, et al. Estimates of world-wide distribution of child  
8 347 deaths from acute respiratory infections. *Lancet Infect Dis* 2002;2(1):25-32.  
9 348 21. Escobar C, Luchsinger V, de Oliveira DB, et al. Genetic variability of human  
10 349 metapneumovirus isolated from Chilean children, 2003-2004. *J Med Virol* 2009;81(2):340-4.  
11 350 doi: 10.1002/jmv.21399  
12 351 22. Garcia-Garcia ML, Calvo C, Rey C, et al. Human metapneumovirus infections in hospitalized  
13 352 children and comparison with other respiratory viruses. 2005-2014 prospective study. *PLoS*  
14 353 *One* 2017;12(3):e0173504. DOI: 10.1371/journal.pone.04. doi: 10.1371/journal.pone.0173504  
15 354 23. Ljubin-Sternak S, Santak M, Cepin-Bogovic J, et al. Detection of genetic lineages of human  
16 355 metapneumovirus in Croatia during the winter season 2005/2006. *J Med Virol*  
17 356 2008;80(7):1282-7. doi: 10.1002/jmv.21196  
18 357 24. McCracken JP, Arvelo W, Ortiz J, et al. Comparative epidemiology of human  
19 358 metapneumovirus- and respiratory syncytial virus-associated hospitalizations in Guatemala.  
20 359 *Influenza Other Respir Viruses* 2014;8(4):414-21. doi: 10.1111/irv.12251  
21 360 25. Nor'e SS, Sam IC, Mohamad Fakri EF, et al. Phylogenetic analysis of human  
22 361 metapneumovirus among children with acute respiratory infections in Kuala Lumpur,  
23 362 Malaysia. *Trop Biomed* 2014;31(3):562-6.  
24 363 26. Ordas J, Boga JA, Alvarez-Arguelles M, et al. Role of metapneumovirus in viral respiratory  
25 364 infections in young children. *J Clin Microbiol* 2006;44(8):2739-42. doi:  
26 365 10.1128/JCM.00164-06  
27 366 27. Rafiefard F, Yun Z, Orvell C. Epidemiologic characteristics and seasonal distribution of  
28 367 human metapneumovirus infections in five epidemic seasons in Stockholm, Sweden,  
29 368 2002-2006. *J Med Virol* 2008;80(9):1631-8. doi: 10.1002/jmv.21242  
30 369 28. Rodriguez PE, Adamo MP, Paglini MG, et al. [Mono-infection of human Metapneumovirus in  
31 370 Cordoba: first clinical and epidemiological research in children with respiratory infection in  
32 371 2011]. *Rev Fac Cien Med Univ Nac Cordoba* 2016;73(3):170-75.  
33 372 29. Zeng SZ, Xiao NG, Zhong LL, et al. Clinical features of human metapneumovirus genotypes  
34 373 in children with acute lower respiratory tract infection in Changsha, China. *J Med Virol*  
35 374 2015;87(11):1839-45. doi: 10.1002/jmv.24249  
36 375 30. Zhu RN, Qian Y, Zhao LQ, et al. Characterization of human metapneumovirus from pediatric  
37 376 patients with acute respiratory infections in a 4-year period in Beijing, China. *Chin Med J*  
38 377 *(Engl)* 2011;124(11):1623-8.  
39 378 31. Cai XY, Wang Q, Lin GY, et al. Respiratory virus infections among children in South China. *J*  
40 379 *Med Virol* 2014;86(7):1249-55. doi: 10.1002/jmv.23931  
41 380 32. Matsuzaki Y, Itagaki T, Abiko C, et al. Clinical impact of human metapneumovirus genotypes  
42 381 and genotype-specific seroprevalence in Yamagata, Japan. *J Med Virol* 2008;80(6):1084-9. doi:  
43 382 10.1002/jmv.21194  
44 383 33. Barbosa Ramirez J, Pulido Dominguez P, Rey Benito G, et al. Human respiratory syncytial  
45 384 virus and metapneumovirus in patients with acute respiratory infection in Colombia, 2000 -  
46 385 2011. *Rev Panam Salud Publica* 2014;36(2):101-9.

- 1  
2  
3 386 34. Zhang C, Du LN, Zhang ZY, et al. Detection and genetic diversity of human  
4 387 metapneumovirus in hospitalized children with acute respiratory infections in Southwest  
5 388 China. *J Clin Microbiol* 2012;50(8):2714-9. doi: 10.1128/JCM.00809-12  
6  
7 389 35. McAdam AJ, Hasenbein ME, Feldman HA, et al. Human metapneumovirus in children tested  
8 390 at a tertiary-care hospital. *J Infect Dis* 2004;190(1):20-6. doi: 10.1086/421120  
9  
10 391 36. Boivin G, De Serres G, Cote S, et al. Human metapneumovirus infections in hospitalized  
11 392 children. *Emerg Infect Dis* 2003;9(6):634-40. doi: 10.3201/eid0906.030017  
12  
13 393 37. Maggi F, Pifferi M, Vatteroni M, et al. Human metapneumovirus associated with respiratory  
14 394 tract infections in a 3-year study of nasal swabs from infants in Italy. *J Clin Microbiol*  
15 395 2003;41(7):2987-91.  
16  
17 396 38. van den Hoogen BG, van Doornum GJ, Fockens JC, et al. Prevalence and clinical symptoms  
18 397 of human metapneumovirus infection in hospitalized patients. *J Infect Dis*  
19 398 2003;188(10):1571-7. doi: 10.1086/379200  
20  
21 399 39. Peiris JS, Tang WH, Chan KH, et al. Children with respiratory disease associated with  
22 400 metapneumovirus in Hong Kong. *Emerg Infect Dis* 2003;9(6):628-33. doi:  
23 401 10.3201/eid0906.030009  
24  
25 402 40. Greensill J, McNamara PS, Dove W, et al. Human metapneumovirus in severe respiratory  
26 403 syncytial virus bronchiolitis. *Emerg Infect Dis* 2003;9(3):372-5. doi: 10.3201/eid0903.020289  
27  
28 404 41. Lin PY, Lin TY, Huang YC, et al. Human metapneumovirus and community-acquired  
29 405 pneumonia in children. *Chang Gung Med J* 2005;28(10):683-8.  
30  
31 406 42. Ghattas C, Mossad SB. Fatal human metapneumovirus and influenza B virus coinfection in an  
32 407 allogeneic hematopoietic stem cell transplant recipient. *Transpl Infect Dis*  
33 408 2012;14(5):E41-3. DOI: 10.1111/j.1399-3062.2012.00766.x. doi:  
34 409 10.1111/j.1399-3062.2012.00766.x  
35  
36 410 43. Fathima S, Lee BE, May-Hadford J, et al. Use of an innovative web-based laboratory  
37 411 surveillance platform to analyze mixed infections between human metapneumovirus (hMPV)  
38 412 and other respiratory viruses circulating in Alberta (AB), Canada (2009-2012). *Viruses*  
39 413 2012;4(11):2754-65. doi: 10.3390/v4112754  
40  
41 414 44. Kaida A, Kubo H, Goto K, et al. Co-infection of human metapneumovirus with adenovirus or  
42 415 respiratory syncytial virus among children in Japan. *Microbiol Immunol* 2007;51(7):679-83.  
43  
44 416 45. Pilger DA, Cantarelli VV, Amantea SL, et al. Detection of human bocavirus and human  
45 417 metapneumovirus by real-time PCR from patients with respiratory symptoms in Southern  
46 418 Brazil. *Mem Inst Oswaldo Cruz* 2011;106(1):56-60.  
47  
48 419 46. Esposito S, Daleno C, Prunotto G, et al. Impact of viral infections in children with  
49 420 community-acquired pneumonia: results of a study of 17 respiratory viruses. *Influenza Other*  
50 421 *Respir Viruses* 2013;7(1):18-26. doi: 10.1111/j.1750-2659.2012.00340.x  
51  
52 422 47. Kahn JS. Newly discovered respiratory viruses: significance and implications. *Curr Opin*  
53 423 *Pharmacol* 2007;7(5):478-83. doi: 10.1016/j.coph.2007.07.004  
54  
55 424 48. Wolf DG, Greenberg D, Kalkstein D, et al. Comparison of human metapneumovirus,  
56 425 respiratory syncytial virus and influenza A virus lower respiratory tract infections in  
57 426 hospitalized young children. *Pediatr Infect Dis J* 2006;25(4):320-4. doi:  
58 427 10.1097/01.inf.0000207395.80657.cf  
59  
60 428 49. Wilkesmann A, Schildgen O, Eis-Hubinger AM, et al. Human metapneumovirus infections  
61 429 cause similar symptoms and clinical severity as respiratory syncytial virus infections. *Eur J*



- 1  
2  
3 430 *Pediatr* 2006;165(7):467-75. doi: 10.1007/s00431-006-0105-4
- 4 431 50. Adams O, Weis J, Jasinska K, et al. Comparison of human metapneumovirus, respiratory  
5 432 syncytial virus and Rhinovirus respiratory tract infections in young children admitted to  
6 433 hospital. *J Med Virol* 2015;87(2):275-80. doi: 10.1002/jmv.24025
- 7 434 51. Moe N, Krokstad S, Stenseng IH, et al. Comparing Human Metapneumovirus and Respiratory  
8 435 Syncytial Virus: Viral Co-Detections, Genotypes and Risk Factors for Severe Disease. *PLoS*  
9 436 *One* 2017;12(1):e0170200.DOI: 10.1371/journal.pone.00. doi: 10.1371/journal.pone.0170200
- 10 437 52. Yan XL, Li YN, Tang YJ, et al. Clinical characteristics and viral load of respiratory syncytial  
11 438 virus and human metapneumovirus in children hospitalized for acute lower respiratory tract  
12 439 infection. *J Med Virol* 2017;89(4):589-97. doi: 10.1002/jmv.24687
- 13 440 53. Caracciolo S, Minini C, Colombrita D, et al. Human metapneumovirus infection in young  
14 441 children hospitalized with acute respiratory tract disease: virologic and clinical features.  
15 442 *Pediatr Infect Dis J* 2008;27(5):406-12. doi: 10.1097/INF.0b013e318162a164
- 16 443 54. Williams JV, Harris PA, Tollefson SJ, et al. Human metapneumovirus and lower respiratory  
17 444 tract disease in otherwise healthy infants and children. *N Engl J Med* 2004;350(5):443-50. doi:  
18 445 10.1056/NEJMoa025472
- 19 446 55. Schuster JE, Khuri-Bulos N, Faouri S, et al. Human Metapneumovirus Infection in Jordanian  
20 447 Children: Epidemiology and Risk Factors for Severe Disease. *Pediatr Infect Dis J*  
21 448 2015;34(12):1335-41. doi: 10.1097/INF.0000000000000892
- 22 449 56. Semple MG, Cowell A, Dove W, et al. Dual infection of infants by human metapneumovirus  
23 450 and human respiratory syncytial virus is strongly associated with severe bronchiolitis. *J Infect*  
24 451 *Dis* 2005;191(3):382-6. doi: 10.1086/426457
- 25  
26  
27  
28  
29  
30  
31  
32  
33  
34  
35  
36  
37  
38  
39  
40  
41  
42  
43  
44  
45  
46  
47  
48  
49  
50  
51  
52  
53  
54  
55  
56  
57  
58  
59  
60

452 **Table 1. Distribution of co-pathogens in 19 HMPV-positive patients**

| Co-pathogens <sup>a</sup> | Patient No. (%) |
|---------------------------|-----------------|
| RSV/HMPV                  | 7(36.8)         |
| HCoV-OC43/ HMPV           | 3(15.8)         |
| MP/ HMPV                  | 3(15.8)         |
| HBoV/ HMPV                | 3(15.8)         |
| ADV/ HMPV                 | 2(10.5)         |
| HRV/ HMPV                 | 2(10.5)         |
| InfA/ HMPV                | 2(10.5)         |
| PIV2/ HMPV                | 1(5.3)          |
| PIV3/ HMPV                | 1(5.3)          |

453 <sup>a</sup>HMPV-positive patients were tested for 17 common respiratory pathogens.

454 InfB, PIV1, PIV4, EV, HCoV-HKU1, HCoV-229E, HCoV-NL63, CP were not detected.

455 Percentages sum to >100% because some patients were co-infected with more than  
 456 two viruses.

457

Table 2. Clinical presentations in HMPV-positive patients

| Characteristics                              | Total HMPV infection (n=101) | Patients with single HMPV and co-pathogens |                      | p value <sup>b</sup> |
|----------------------------------------------|------------------------------|--------------------------------------------|----------------------|----------------------|
|                                              |                              | Single HMPV (n = 83)                       | Co-pathogens (n= 18) |                      |
| <b>URTI</b>                                  |                              |                                            |                      |                      |
| Nasal obstruction                            | 40(39.6)                     | 34(41.0)                                   | 6(33.3)              | 0.605                |
| Coryza                                       | 51(50.5)                     | 44(53.0)                                   | 7(38.9)              | 0.309                |
| Sneeze                                       | 1(1.0)                       | 1(1.2)                                     | 0(0)                 | — <sup>c</sup>       |
| Cough                                        | 101(100)                     | 83(100)                                    | 18(100)              | — <sup>d</sup>       |
| Expectoration                                | 78(77.2)                     | 66(79.5)                                   | 12(66.7)             | 0.351                |
| Pharyngeal discomfort                        | 2(2.0)                       | 2(2.4)                                     | 0(0)                 | — <sup>c</sup>       |
| Hoarseness                                   | 1(1.0)                       | 1(1.2)                                     | 0(0)                 | — <sup>c</sup>       |
| <b>LRTI</b>                                  |                              |                                            |                      |                      |
| Abnormal pulmonary breath sound <sup>a</sup> | 92(91.1)                     | 75(90.4)                                   | 17(94.4)             | 0.582                |
| Increasing lung markings                     | 6(6.0)                       | 4(4.8)                                     | 2(11.1)              | 0.29                 |
| Bronchiolitis                                | 8(7.9)                       | 7(8.4)                                     | 1(5.6)               | 0.682                |
| Pneumonia                                    | 11(10.9)                     | 10(12.1)                                   | 1(5.6)               | 0.684                |
| bronchopneumonia                             | 56(55.4)                     | 46(55.4)                                   | 10(55.6)             | 0.992                |
| wheezing                                     | 47(46.5)                     | 40(48.2)                                   | 7(38.9)              | 0.473                |
| anhelation                                   | 24(23.8)                     | 21(25.3)                                   | 3(16.7)              | 0.551                |
| <b>Systemic influenza-like symptoms</b>      |                              |                                            |                      |                      |
| Fever (≥38°C)                                | 89(88.1)                     | 76(91.6)                                   | 13(72.2)             | <b>0.037</b>         |
| Chill                                        | 7(6.9)                       | 6(7.2)                                     | 1(5.6)               | 0.8                  |
| Debilitation                                 | 11(10.9)                     | 11(13.3)                                   | 0(0)                 | — <sup>c</sup>       |
| <b>Gastrointestinal illness</b>              |                              |                                            |                      |                      |
| Vomiting                                     | 21(20.8)                     | 16(19.3)                                   | 5(27.8)              | 0.522                |
| Poor appetite                                | 19(18.8)                     | 17(20.5)                                   | 2(11.1)              | 0.513                |
| Diarrhea                                     | 7(7.0)                       | 3(3.6)                                     | 4(22.2)              | <b>0.018</b>         |

458 Data are presented as No. (%) of each group.

459 Percentages sum to >100% because some patients had >1 clinical presentations.

460 <sup>a</sup>Including phlegmatic rales, wheezing rales, bubbling rales, and moist rales.

461 <sup>b</sup>Two-tailed  $\chi^2$  test comparing the distribution of each illness or diagnosis between  
 462 HMPV mono- and co-infected patients.

463 <sup>c</sup>Not tested because the number of positive samples obtained was small.

464 <sup>d</sup>Not tested because the rate of positive samples obtained was 100%.

## Figure 1

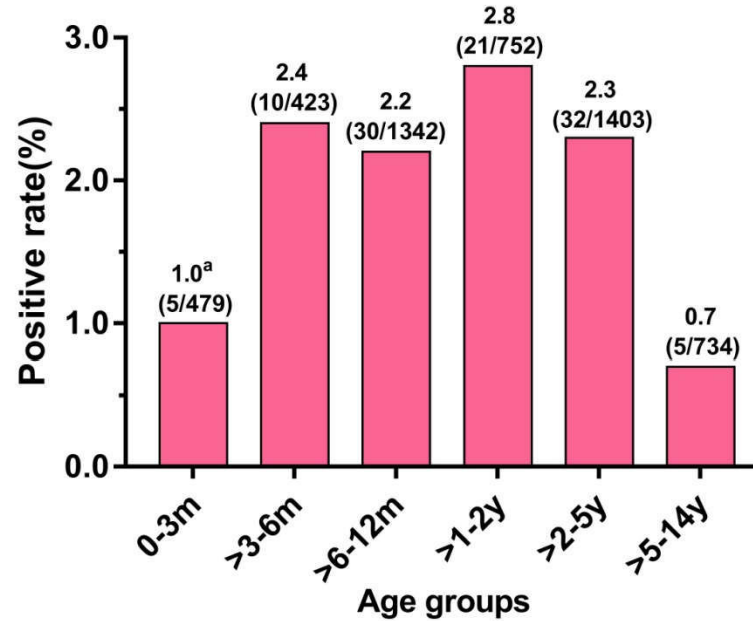

**Figure 1** Age distributions of patients with HMPV.

<sup>a</sup>Data were presented as positive rate(positive number/total number) in each group; m: month(s); y: year(s).

Figure 2

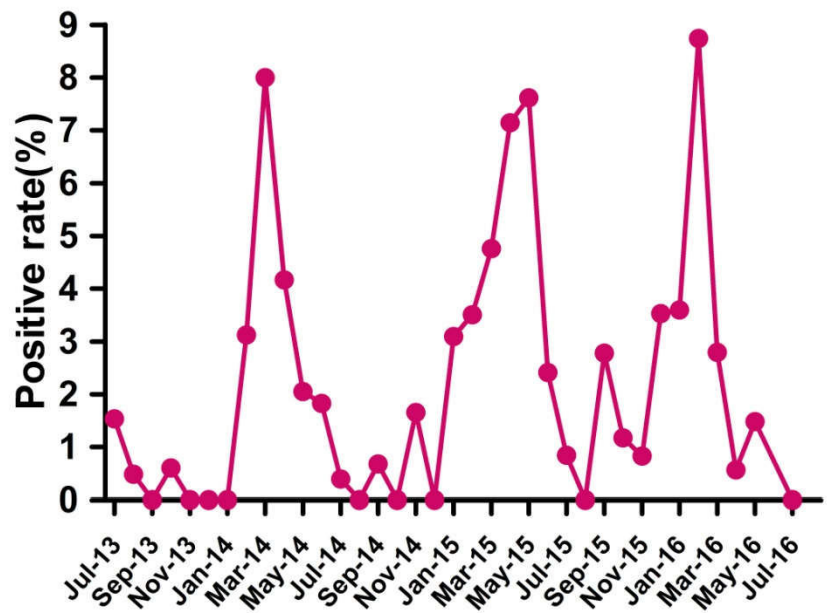

**Figure 2** Seasonal distribution of HMPV infection in pediatric patients hospitalized with acute respiratory infection from July 2013 to June 2016 in Guangzhou.

STROBE 2007 (v4) Statement—Checklist of items that should be included in reports of *cross-sectional studies*

| Section/Topic                | Item # | Recommendation                                                                                                                                                                       | Reported on page # |
|------------------------------|--------|--------------------------------------------------------------------------------------------------------------------------------------------------------------------------------------|--------------------|
| Title and abstract           | 1      | (a) Indicate the study's design with a commonly used term in the title or the abstract                                                                                               | 1                  |
|                              |        | (b) Provide in the abstract an informative and balanced summary of what was done and what was found                                                                                  | 2-3                |
| <b>Introduction</b>          |        |                                                                                                                                                                                      |                    |
| Background/rationale         | 2      | Explain the scientific background and rationale for the investigation being reported                                                                                                 | 4                  |
| Objectives                   | 3      | State specific objectives, including any prespecified hypotheses                                                                                                                     | 4-5                |
| <b>Methods</b>               |        |                                                                                                                                                                                      |                    |
| Study design                 | 4      | Present key elements of study design early in the paper                                                                                                                              | 6                  |
| Setting                      | 5      | Describe the setting, locations, and relevant dates, including periods of recruitment, exposure, follow-up, and data collection                                                      | 6                  |
| Participants                 | 6      | (a) Give the eligibility criteria, and the sources and methods of selection of participants                                                                                          | 6                  |
| Variables                    | 7      | Clearly define all outcomes, exposures, predictors, potential confounders, and effect modifiers. Give diagnostic criteria, if applicable                                             | 6-7                |
| Data sources/<br>measurement | 8*     | For each variable of interest, give sources of data and details of methods of assessment (measurement). Describe comparability of assessment methods if there is more than one group | 7                  |
| Bias                         | 9      | Describe any efforts to address potential sources of bias                                                                                                                            | 6                  |
| Study size                   | 10     | Explain how the study size was arrived at                                                                                                                                            | 6                  |
| Quantitative variables       | 11     | Explain how quantitative variables were handled in the analyses. If applicable, describe which groupings were chosen and why                                                         | 7-8                |
| Statistical methods          | 12     | (a) Describe all statistical methods, including those used to control for confounding                                                                                                | 8                  |
|                              |        | (b) Describe any methods used to examine subgroups and interactions                                                                                                                  | 8                  |
|                              |        | (c) Explain how missing data were addressed                                                                                                                                          | 7                  |
|                              |        | (d) If applicable, describe analytical methods taking account of sampling strategy                                                                                                   | 8                  |
|                              |        | (e) Describe any sensitivity analyses                                                                                                                                                |                    |
| <b>Results</b>               |        |                                                                                                                                                                                      |                    |

|                          |     |                                                                                                                                                                                                              |       |
|--------------------------|-----|--------------------------------------------------------------------------------------------------------------------------------------------------------------------------------------------------------------|-------|
| Participants             | 13* | (a) Report numbers of individuals at each stage of study—eg numbers potentially eligible, examined for eligibility, confirmed eligible, included in the study, completing follow-up, and analysed            | 9     |
|                          |     | (b) Give reasons for non-participation at each stage                                                                                                                                                         | 10    |
|                          |     | (c) Consider use of a flow diagram                                                                                                                                                                           |       |
| Descriptive data         | 14* | (a) Give characteristics of study participants (eg demographic, clinical, social) and information on exposures and potential confounders                                                                     | 9-11  |
|                          |     | (b) Indicate number of participants with missing data for each variable of interest                                                                                                                          | 9     |
| Outcome data             | 15* | Report numbers of outcome events or summary measures                                                                                                                                                         | 9-11  |
| Main results             | 16  | (a) Give unadjusted estimates and, if applicable, confounder-adjusted estimates and their precision (eg, 95% confidence interval). Make clear which confounders were adjusted for and why they were included | 9-11  |
|                          |     | (b) Report category boundaries when continuous variables were categorized                                                                                                                                    | 9-10  |
|                          |     | (c) If relevant, consider translating estimates of relative risk into absolute risk for a meaningful time period                                                                                             |       |
| Other analyses           | 17  | Report other analyses done—eg analyses of subgroups and interactions, and sensitivity analyses                                                                                                               |       |
| <b>Discussion</b>        |     |                                                                                                                                                                                                              |       |
| Key results              | 18  | Summarise key results with reference to study objectives                                                                                                                                                     | 12-15 |
| Limitations              | 19  | Discuss limitations of the study, taking into account sources of potential bias or imprecision. Discuss both direction and magnitude of any potential bias                                                   | 15    |
| Interpretation           | 20  | Give a cautious overall interpretation of results considering objectives, limitations, multiplicity of analyses, results from similar studies, and other relevant evidence                                   | 12-15 |
| Generalisability         | 21  | Discuss the generalisability (external validity) of the study results                                                                                                                                        | 12-15 |
| <b>Other information</b> |     |                                                                                                                                                                                                              |       |
| Funding                  | 22  | Give the source of funding and the role of the funders for the present study and, if applicable, for the original study on which the present article is based                                                | 17    |

\*Give information separately for cases and controls in case-control studies and, if applicable, for exposed and unexposed groups in cohort and cross-sectional studies.

**Note:** An Explanation and Elaboration article discusses each checklist item and gives methodological background and published examples of transparent reporting. The STROBE checklist is best used in conjunction with this article (freely available on the Web sites of PLoS Medicine at <http://www.plosmedicine.org/>, Annals of Internal Medicine at <http://www.annals.org/>, and Epidemiology at <http://www.epidem.com/>). Information on the STROBE Initiative is available at [www.strobe-statement.org](http://www.strobe-statement.org).

# BMJ Open

## Epidemiology and clinical features of human metapneumovirus in children hospitalized with acute respiratory illness from 2013 to 2016: a cross-sectional study in Guangzhou, southern China

|                                 |                                                                                                                                                                                                                                                                                                                                                                                                                                                                                                                                                                                                                                                                                                                                                                                                                                                                                                                                                                                                                                                                                                                                                                                                                                                                                                                                                                                                                                                                                        |
|---------------------------------|----------------------------------------------------------------------------------------------------------------------------------------------------------------------------------------------------------------------------------------------------------------------------------------------------------------------------------------------------------------------------------------------------------------------------------------------------------------------------------------------------------------------------------------------------------------------------------------------------------------------------------------------------------------------------------------------------------------------------------------------------------------------------------------------------------------------------------------------------------------------------------------------------------------------------------------------------------------------------------------------------------------------------------------------------------------------------------------------------------------------------------------------------------------------------------------------------------------------------------------------------------------------------------------------------------------------------------------------------------------------------------------------------------------------------------------------------------------------------------------|
| Journal:                        | <i>BMJ Open</i>                                                                                                                                                                                                                                                                                                                                                                                                                                                                                                                                                                                                                                                                                                                                                                                                                                                                                                                                                                                                                                                                                                                                                                                                                                                                                                                                                                                                                                                                        |
| Manuscript ID                   | bmjopen-2017-019308.R1                                                                                                                                                                                                                                                                                                                                                                                                                                                                                                                                                                                                                                                                                                                                                                                                                                                                                                                                                                                                                                                                                                                                                                                                                                                                                                                                                                                                                                                                 |
| Article Type:                   | Research                                                                                                                                                                                                                                                                                                                                                                                                                                                                                                                                                                                                                                                                                                                                                                                                                                                                                                                                                                                                                                                                                                                                                                                                                                                                                                                                                                                                                                                                               |
| Date Submitted by the Author:   | 25-Oct-2017                                                                                                                                                                                                                                                                                                                                                                                                                                                                                                                                                                                                                                                                                                                                                                                                                                                                                                                                                                                                                                                                                                                                                                                                                                                                                                                                                                                                                                                                            |
| Complete List of Authors:       | Zhang, Ling; State Key Laboratory of Respiratory Diseases, The First Affiliated Hospital of Guangzhou Medical University, Guangzhou Medical University<br>Liu, Donglan; State Key Laboratory of Respiratory Diseases, The First Affiliated Hospital of Guangzhou Medical University, Guangzhou Medical University<br>Chen, Dehui; Department of Pediatrics, The First Affiliated Hospital of Guangzhou Medical University, Guangzhou Medical University<br>Tan, Weiping ; Sun Yat-Sen Memorial Hospital, Sun Yat-Sen University<br>Qiu, Shuyan; State Key Laboratory of Respiratory Diseases, The First Affiliated Hospital of Guangzhou Medical University, Guangzhou Medical University<br>Xu, Duo; State Key Laboratory of Respiratory Diseases, The First Affiliated Hospital of Guangzhou Medical University, Guangzhou Medical University<br>Li, Xiao; State Key Laboratory of Respiratory Diseases, The First Affiliated Hospital of Guangzhou Medical University, Guangzhou Medical University<br>Liu, Tiantian; State Key Laboratory of Respiratory Diseases, The First Affiliated Hospital of Guangzhou Medical University, Guangzhou Medical University<br>Liu, Wenkuan; State Key Laboratory of Respiratory Diseases, The First Affiliated Hospital of Guangzhou Medical University, Guangzhou Medical University<br>Zhou, Rong; State Key Laboratory of Respiratory Diseases, The First Affiliated Hospital of Guangzhou Medical University, Guangzhou Medical University |
| <b>Primary Subject Heading</b>: | Infectious diseases                                                                                                                                                                                                                                                                                                                                                                                                                                                                                                                                                                                                                                                                                                                                                                                                                                                                                                                                                                                                                                                                                                                                                                                                                                                                                                                                                                                                                                                                    |
| Secondary Subject Heading:      | Epidemiology, Paediatrics, Infectious diseases                                                                                                                                                                                                                                                                                                                                                                                                                                                                                                                                                                                                                                                                                                                                                                                                                                                                                                                                                                                                                                                                                                                                                                                                                                                                                                                                                                                                                                         |
| Keywords:                       | Human metapneumovirus, Epidemiology < TROPICAL MEDICINE, Clinical feature, Acute respiratory illness                                                                                                                                                                                                                                                                                                                                                                                                                                                                                                                                                                                                                                                                                                                                                                                                                                                                                                                                                                                                                                                                                                                                                                                                                                                                                                                                                                                   |
|                                 |                                                                                                                                                                                                                                                                                                                                                                                                                                                                                                                                                                                                                                                                                                                                                                                                                                                                                                                                                                                                                                                                                                                                                                                                                                                                                                                                                                                                                                                                                        |



1  
2  
3  
4  
5  
6  
7  
8  
9  
10  
11  
12  
13  
14  
15  
16  
17  
18  
19  
20  
21  
22  
23  
24  
25  
26  
27  
28  
29  
30  
31  
32  
33  
34  
35  
36  
37  
38  
39  
40  
41  
42  
43  
44  
45  
46  
47  
48  
49  
50  
51  
52  
53  
54  
55  
56  
57  
58  
59  
60

SCHOLARONE™  
Manuscripts

For peer review only

1  
2  
3  
4 **1 Epidemiology and clinical features of human metapneumovirus in children**  
5  
6 **2 hospitalized with acute respiratory illness from 2013 to 2016: a cross-sectional**  
7  
8 **3 study in Guangzhou, southern China**  
9  
10  
11  
12  
13  
14

15 Ling Zhang<sup>1†</sup>, Donglan Liu<sup>1†</sup>, Dehui Chen<sup>2</sup>, Weiping Tan<sup>3</sup>, Shuyan Qiu<sup>1</sup>, Duo Xu<sup>1</sup>, Xiao  
16 Li<sup>1</sup>, Tiantian Liu<sup>1</sup>, Wenkuan Liu<sup>1\*</sup>, Rong Zhou<sup>1\*</sup>  
17  
18  
19  
20  
21

22 <sup>1</sup>State Key Laboratory of Respiratory Diseases, The First Affiliated Hospital of  
23 Guangzhou Medical University, Guangzhou Medical University, Guangzhou,  
24 People's Republic of China.  
25  
26  
27  
28

29 <sup>2</sup>Department of Pediatrics, The First Affiliated Hospital of Guangzhou Medical  
30 University, Guangzhou Medical University, Guangzhou, People's Republic of China.  
31  
32  
33

34 <sup>3</sup>Sun Yat-Sen Memorial Hospital, Sun Yat-Sen University, Guangzhou, People's  
35 Republic of China.  
36  
37  
38  
39  
40

41 \*Correspondence to Wenkuan Liu; [ahlwk2000-2004@163.com](mailto:ahlwk2000-2004@163.com) and Rong Zhou;  
42 [zhourong@gird.cn](mailto:zhourong@gird.cn)  
43  
44  
45

46 <sup>†</sup>Ling Zhang, Donglan Liu contributed equally to this work.  
47  
48  
49  
50  
51  
52  
53  
54  
55  
56  
57  
58  
59  
60

1  
2  
3  
4  
5  
6  
7  
8  
9  
10  
11  
12  
13  
14  
15  
16  
17  
18  
19 **Abstract**

20 **Objectives:** Human metapneumovirus (HMPV) is one of the most important  
21 respiratory viral pathogens among infants and children worldwide. Our study was  
22 designed to analyze epidemiological and clinical characteristics of HMPV present in  
23 patients hospitalized with acute respiratory illness (ARI) in Guangzhou, southern  
24 China.

25 **Study design:** A cross-sectional study.

26 **Setting:** Two tertiary hospitals in Guangzhou.

27 **Participants and methods:** Throat swabs were collected and tested from pediatric  
28 patients ( $\leq 14$  years,  $n=5133$ ) hospitalized with ARI over a three-year period, and 101  
29 of 103 (98.1%) HMPV-positive patients' clinical presentations were recorded for  
30 further analysis.

31 **Results:** Of the 5133 patients, 103 (2.0%) were positive for HMPV. HMPV mostly  
32 distributed in children with the age groups of  $>3-6$  months (2.4%, 10/423),  $>6-12$   
33 months (2.2%, 30/1342),  $>1-2$  years (2.8%, 21/752) and  $>2-5$  years (2.3%, 32/1403)  
34 ( $p=0.865$ ). Two seasonal HMPV frequency peaks were found every year, and mainly  
35 occurred in spring and early summer. Nineteen of 103 (18.4%) HMPV-positive  
36 patients were co-detected with other pathogens, and the most common co-detected  
37 pathogen was respiratory syncytial virus (36.8%, 7/19). HMPV-positive patients  
38 presented a wide spectrum of symptoms, including cough (100.0%, 101/101),  
39 abnormal pulmonary breath sound (91.1%, 92/101), fever (88.1%, 89/101),  
40 expectoration (77.2%, 78/101), coryza (50.5%, 51/101) and wheezing (46.5%,

1  
2  
3  
4 41 47/101). The major diagnosis of HMPV-positive patients was bronchopneumonia  
5  
6 42 (55.4%, 56/101). Fever ( $\geq 38^{\circ}\text{C}$ ) (91.6%, 76/83) was detected more often in single  
7  
8 43 HMPV-positive patients than in co-pathogens-positive patients (72.2%, 13/18)  
9  
10  
11 44 ( $p=0.037$ ), whereas diarrhea was presented more common in co-pathogens-positive  
12  
13 45 patients (22.2%, 4/18) than single HMPV-positive patients (3.6%, 3/83) ( $p=0.018$ ).  
14  
15

16 **Conclusions:** HMPV is a common respiratory pathogen in children with ARI in  
17  
18 47 Guangzhou, particularly in patients from 3 months to 5 years old. HMPV epidemic has  
19  
20  
21 48 a seasonal variation. Bronchopneumonia is the major diagnosis in HMPV-positive  
22  
23 49 patients.  
24  
25

#### 26 27 28 51 **Strengths and limitations of this study**

29  
30 ■ This is the study that lasted three years consecutively and had a large sample  
31  
32 size (more than five thousands). Patients were enrolled from two large  
33  
34 municipal tertiary hospitals (hospital beds > 1000). In addition, patients  
35  
36 54 enrolled in the study had a large age spanning from infancy to juveniles. Thus,  
37  
38 55 our results possess representative characteristics of HMPV presence in children  
39  
40 56 with ARI in this area.  
41  
42  
43  
44

45 58  
46  
47 ■ The study had some limitations: the characteristics of HMPV-negative patients  
48  
49 were not further analyzed, and bacterial pathogens were not detected in  
50  
51 HMPV-positive patients. Lack of these data may affect our comprehensively  
52  
53 61 understanding the clinical characteristics caused by this pathogen.  
54  
55 62  
56  
57

63

64

## 65 Introduction

66 Human metapneumovirus (HMPV) is a nonsegmented, negative-sense  
67 single-stranded RNA virus, which belongs to the *Paramyxoviridae* family,  
68 *Pneumovirinae* subfamily, and *Metapneumovirus* genus.<sup>1</sup> HMPV was first discovered  
69 in 2001 in the Netherlands, and isolated from a pediatric patient with acute respiratory  
70 illness (ARI).<sup>2</sup> Since then, HMPV has been found in associated with acute respiratory  
71 disease in individuals of all ages worldwide. Children, elderly, and  
72 immunocompromised adults are more easily to contract the virus.<sup>3-5</sup> Children younger  
73 than 5 years of age seem to be particularly susceptible to HMPV. Previous studies,<sup>6-12</sup>  
74 which mainly conducting in developed countries, have revealed that approximately  
75 2.5–11.3% of respiratory samples were positive for HMPV in children  $\leq 5$  years, and  
76 90% of individuals have positive serology for HMPV by 5 years of age.<sup>13</sup>

77 HMPV causes a variety of clinical symptoms ranging from a mild upper  
78 respiratory tract infection (URTI) to life-threatening lower respiratory tract infection  
79 (LRTI).<sup>3 14-16</sup> However, there is so far no effective vaccine and medication either for  
80 prevention or treatment available for HMPV infection. Thus, it is imperative to conduct  
81 more studies, especially in developing and undeveloped countries, to understand this  
82 pathogen in different areas and populations.

83 In this study, we consecutively investigated, from July 2013 to June 2016, the  
84 epidemiological and clinical features of HMPV present in pediatric patients ( $\leq 14$  years)

1  
2  
3  
4 85 hospitalized with ARI in Guangzhou, southern China, using real-time PCR. The  
5  
6 86 findings of this study will be helpful in understanding the distribution of HMPV in  
7  
8 87 subtropical region. Our results also provide valuable insight into the clinical features of  
9  
10  
11 88 HMPV, which will be helpful in early clinical diagnosis.  
12  
13  
14  
15  
16  
17  
18  
19  
20  
21  
22  
23  
24  
25  
26  
27  
28  
29  
30  
31  
32  
33  
34  
35  
36  
37  
38  
39  
40  
41  
42  
43  
44  
45  
46  
47  
48  
49  
50  
51  
52  
53  
54  
55  
56  
57  
58  
59  
60

For peer review only

## 89 **Methods**

### 90 **Study design and respiratory sample collection**

91 This was a cross-sectional study at two tertiary hospitals, the First Affiliated  
92 Hospital of Guangzhou Medical University and Sun Yat-Sen Memorial Hospital in  
93 Guangzhou. Samples in this study were taken as part of standard care. Throat swab  
94 samples (n=5133) from pediatric patients ( $\leq 14$  years) hospitalized with ARI were  
95 collected at two hospitals between July 2013 and June 2016. ARI was defined as an  
96 illness that presented with at least two of the following symptoms: cough, pharyngeal  
97 discomfort, nasal obstruction, coryza, sneeze, dyspnoea, or diagnosed with  
98 pneumonia by chest radiography during the previous week. Chest radiography was  
99 performed based on the clinical situation of the patients. The samples were collected  
100 according to established clinical protocols.<sup>17</sup> The samples were refrigerated at 2–8°C  
101 in viral transport medium, transported on ice to the State Key Laboratory of  
102 Respiratory Diseases, and analyzed immediately or stored at -80°C before analysis  
103 as previously described.<sup>18</sup>

104 The patients' clinical presentations or diagnoses were extracted from their  
105 medical records using designed presentation cards and were retrospectively  
106 categorized into the following four groups: URTI, LRTI, systemic influenza-like  
107 symptoms, and gastrointestinal illness. Patients with nasal obstruction, coryza,  
108 sneezing, coughing, expectoration, pharyngeal discomfort, or hoarseness were  
109 categorized as having URTI. Patients with bronchiolitis, pneumonia,  
110 bronchopneumonia, increased lung markings, dyspnea, or an abnormal pulmonary

1  
2  
3  
4 111 breath sound were categorized as having LRTI. Patients with high fever ( $\geq 38^{\circ}\text{C}$ ),  
5  
6 112 chills, dizziness,, headache, myalgia, or debilitation were categorized as having  
7  
8 113 systemic influenza-like symptoms. Patients with vomiting, poor appetite, or diarrhea  
9  
10 114 were categorized as having gastrointestinal illness. Some patients were assigned to  
11  
12 115 several clinical presentation groups. Patients with incomplete clinical data were  
13  
14 116 excluded from this analysis. Increased lung markings, bronchopneumonia,  
15  
16 117 pneumonia, and bronchiolitis were diagnosed by chest radiography. Abnormal  
17  
18 118 pulmonary breath sounds included phlegmatic rales, wheezy rales, bubbling rales,  
19  
20 119 and moist rales. Other clinical symptoms were identified by a general medical  
21  
22 120 examination and clinical descriptions as previously reported.<sup>19</sup>  
23  
24  
25  
26  
27

28 121

#### 30 122 **Real-time RT-PCR for HMPV detection**

31  
32  
33 123 RNA were extracted from the throat swab samples with the QIAamp Viral RNA  
34  
35 124 Mini Kit (Qiagen, Shanghai, China), according to the manufacturer's protocols. HMPV  
36  
37 125 was determined by using TaqMan Real-time PCR assays, as previously reported,<sup>18</sup>  
38  
39 126 using kits from Guangzhou HuYanSuo Medical Technology Co., Ltd according to the  
40  
41 127 manufacturer's protocols. In brief, 50  $\mu\text{l}$  RNA were extracted from 200  $\mu\text{l}$  sample, and  
42  
43 128 real-time PCR was conducted using 25  $\mu\text{l}$  reaction mix containing M-MLV, Taq  
44  
45 129 polymerase and 5  $\mu\text{l}$  extracted RNA. Cycling conditions included an initial reverse  
46  
47 130 transcription at  $55^{\circ}\text{C}$  for 10 min incubation at  $94^{\circ}\text{C}$  for 2 min, followed by 40 cycles of  
48  
49 131  $94^{\circ}\text{C}$  for 10 sec and  $55^{\circ}\text{C}$  for 35 sec (ABI-7500 real-time PCR instrument, Life  
50  
51  
52  
53 132 Technologies, Singapore).  
54  
55  
56  
57  
58  
59  
60



1  
2  
3  
4 1335  
6 134 **Detection of common respiratory pathogens in HMPV-positive patients**

7  
8 135 HMPV-positive samples were simultaneously tested by using TaqMan Real-time  
9  
10 136 PCR assays for the following 17 respiratory pathogens : respiratory syncytial virus  
11  
12 137 (RSV), parainfluenza virus types 1–4 (PIV1–4), influenza A and B viruses (InfA, InfB),  
13  
14 138 adenovirus (ADV), enterovirus (EV), human coronaviruses (HCoV-229E, HCoV-OC43,  
15  
16 139 HCoV-NL63, HCoV-HKU1), human rhinovirus (HRV), human bocavirus (HBoV),  
17  
18 139 *Mycoplasma pneumoniae* (MP), and *Chlamydomphila pneumoniae* (CP). The testing  
19  
20 140 procedure was conducted using kits from Guangzhou HuYanSuo Medical Technology  
21  
22 141 Co., Ltd as previously described.<sup>18</sup>

23  
24  
25  
26  
27  
28 14329  
30 144 **Statistical analysis**

31  
32 145 All statistical analyses were performed with SPSS statistical software (version  
33  
34 146 19.0; SPSS Inc., Chicago, IL, USA). To compare categorical data, the  $\chi^2$  test and  
35  
36 147 Fisher's exact test were used as appropriate. All tests were two-tailed, and  $p < 0.05$   
37  
38 148 was considered statistically significant.

## 149 **Results**

### 150 **Detection of HMPV from patients with ARI**

151 In total, 5133 pediatric patients aging from infants to 14 years old, hospitalized  
152 with ARI between July 2013 and June 2016 were enrolled in this study. The  
153 male-to-female ratio was 1.75 (3269:1864) and the median age in months was 33  
154 months (interquartile range, 9–48 months). Of the 5133 patients, 103 (2.0%) were  
155 positive for HMPV. The male-to-female ratio was 1.86:1 (67:36) in HMPV-positive  
156 patients and 1.75:1 (3202:1828) in HMPV-negative patients ( $p=0.771$ ). The median  
157 age in months of HMPV-positive patients was 23.5 months (interquartile range, 10–36  
158 months).

### 160 **Co-detection with common respiratory pathogens in HMPV-positive patients**

161 In this study, we also tested HMPV-positive samples for other 17 common  
162 respiratory pathogens. Of the 103 HMPV-positive patients, 84 (81.6%) patients had  
163 single HMPV detection and 19 (18.4%) patients had co-detected other respiratory  
164 pathogens. The male-to-female ratio was 2:1 (56:28) in single HMPV-positive patients  
165 and 1.38:1 (11:8) in co-pathogen-positive patients ( $p=0.469$ ). Nine out of 17  
166 respiratory pathogens (52.9%) were detected, and the most common co-detection  
167 pathogens were RSV (36.8%, 7/19), HCoV-OC43 (15.8%, 3/19), MP (15.8%, 3/19),  
168 and HBoV (15.8%, 3/19) (**Table 1**).

### 170 **Age distributions of HMPV-positive patients**

1  
2  
3  
4 171 Overall, a significant difference of HMPV detection rate was found between  
5  
6 172 patients >5–14 years (0.7%, 5/734) and those ≤5 years (2.2%, 98/4399) ( $p=0.004$ ).  
7  
8 173 For detail, the patients were divided into six age groups: 0–3 months, >3–6  
9  
10 174 months, >6–12 months, >1–2 years, >2–5 years, and >5–14 years. The distribution of  
11  
12 175 HMPV-positive rates among these age groups was significantly different ( $p=0.03$ )  
13  
14 176 (**Figure 1**). HMPV was most frequently detected in children >1–2 years (2.8%,  
15  
16 177 21/752). However, there was no significant difference in the frequency of HMPV  
17  
18 178 detection in the following groups: 2.4% in >3–6 months (10/423), 2.2% in >6–12  
19  
20 179 months (30/1342), 2.8% in >1–2 years (21/752), and 2.3% in >2–5 years (32/1403)  
21  
22 180 ( $p=0.865$ ) (**Figure 1**). Thus, as a whole, HMPV prevalence obviously had a differential  
23  
24 181 age distribution in ARI pediatric patients, predominant in patients from 3 months to 5  
25  
26 182 years old (2.4%, 93/3920)..  
27  
28  
29  
30  
31  
32  
33  
34

### 35 184 **Seasonal distribution of HMPV**

36  
37 185 Over the 3-year study period, the prevalence of HMPV peaked twice every  
38  
39 186 year (**Figure 2**). Large peaks occurred in March 2014 (8%, 16/200), May 2015 (7.6%,  
40  
41 187 8/105), and February 2016 (8.7%, 9/103). Small peaks occurred in November 2014  
42  
43 188 (1.7%, 2/121), September 2015 (2.8%, 2/72), and May 2016 (1.5%, 2/135) (**Figure 2**).  
44  
45  
46  
47  
48  
49

### 50 190 **Clinical presentations of HMPV-positive patients**

51  
52 191 We analyzed the clinical presentations of 101 of 103 (98.1%) HMPV-positive  
53  
54 192 patients, the other two patients were excluded from this analysis due to incomplete  
55  
56  
57  
58  
59  
60

1  
2  
3  
4 193 clinical data. The main symptoms of HMPV-positive patients included cough (100.0%,  
5  
6 101/101), abnormal pulmonary breath sound (91.1%, 92/101), fever (88.1%, 89/101),  
7  
8 195 expectoration (77.2%, 78/101), coryza (50.5%, 51/101) and wheezing (46.5%,  
9  
10  
11 196 47/101), the main diagnosis by chest radiography was bronchopneumonia (55.4%,  
12  
13 197 56/101), followed by pneumonia (10.9%, 11/101) and bronchiolitis (7.9%, 8/101).  
14  
15  
16 198 (**Table 2**). We also compared the clinical features of single HMPV-positive patients  
17  
18 199 with those of the co-pathogens-positive patients. Fever and diarrhea were two  
19  
20  
21 200 symptoms that showed statistically different between these two groups; fever ( $\geq 38^{\circ}\text{C}$ )  
22  
23 201 was seen more common in most of the single HMPV-positive cases (91.6%, 76/83) ,  
24  
25  
26 202 whereas only in 72.2% (13/18) of the multi-pathogen-positive patients ( $p=0.037$ ).  
27  
28 203 Conversely, Diarrhea appeared more often in multi-pathogen-positive patients (22.2%,  
29  
30  
31 204 4/18) than in single HMPV-positive patients (3.6%, 3/83) ( $p=0.018$ ) (**Table 2**).

1  
2  
3  
4  
5  
6  
7  
8  
9  
10  
11  
12  
13  
14  
15  
16  
17  
18  
19  
20  
21  
22  
23  
24  
25  
26  
27  
28  
29  
30  
31  
32  
33  
34  
35  
36  
37  
38  
39  
40  
41  
42  
43  
44  
45  
46  
47  
48  
49  
50  
51  
52  
53  
54  
55  
56  
57  
58  
59  
60

205 **Discussion**

206 Viruses are the most frequent cause of respiratory infection.<sup>20</sup> HMPV has been  
207 recognized as an important respiratory pathogen causing ARI since its discovery in  
208 2001. It has been reported that HMPV was responsible for approximately 5–10% of  
209 hospitalizations of children suffering from ARI,<sup>14</sup> creating considerable clinical and  
210 economic burden worldwide. HMPV detection rates vary according to geographic  
211 location, and the incidence of HMPV may show seasonal or annual patterns in the  
212 same area. In the previous studies,<sup>21-30</sup> the HMPV detection rate was approximately  
213 1–17% of ARI cases. In this 3-year study, 103 of 5133 (2.0%) patients were positive  
214 for HMPV, which is similar to previous reports of HMPV in patients with ARI in  
215 southern China<sup>31</sup> and Japan.<sup>32</sup>

216 HMPV is commonly found in the pediatric population; Children younger than 5  
217 years of age are most susceptible to HMPV infection, and those younger than 2 years  
218 of age at the greatest risk of developing serious conditions.<sup>15</sup> In our study, HMPV  
219 positive cases appeared more frequently in patients ≤5 year-old (2.2%, 98/4399) than  
220 in patients >5 year-old (0.7%, 5/734) ( $p=0.004$ ), which is consistent with many  
221 previous studies.<sup>3 30 33 34</sup> In detail, HMPV positive rate was high in children of 3 months  
222 to 5 years (2.4%, 93/3920) (**Figure 1**). This may be explained by that the immunity  
223 against HMPV passed down from mother gradually subsided as time goes on;  
224 moreover, children were more contact with outside world as they grew older.  
225 Therefore, children of this age need more attention to prevent HMPV infection.  
226 Moreover, our findings suggested no gender predominance, there was no significant

1  
2  
3  
4 227 difference in the HMPV positive rate between males and females ( $p=0.771$ ), which is  
5  
6 228 consistent with previous studies.<sup>35 36</sup>  
7

8  
9 229 HMPV has a typical seasonal distribution. The activity of HMPV is largely  
10  
11 230 affected by different climate factors locally. The activity of HMPV in temperate  
12  
13 231 climates peaks at the end of winter or in early spring.<sup>37 38</sup> In this study, seasonal peaks  
14  
15 232 of HMPV were detected in February 2016, March 2014, and May 2015 (**Figure 2**).  
16  
17 233 This finding indicates that HMPV circulates primarily during the spring and early  
18  
19 234 summer in Guangzhou, as the previous reports in other subtropical areas.<sup>22 39</sup>  
20  
21 235 Furthermore, we also found small peaks in November 2014, September 2015, and  
22  
23 236 May 2016 (**Figure 2**), the reason for this is unknown. It should be pointed out that the  
24  
25 237 seasonal distribution pattern of HMPV overlaps with that of RSV in this area.<sup>19</sup>  
26  
27 238 Knowing the epidemical characteristics of HMPV could be helpful for public health  
28  
29 239 authority and medical community to lay down strategies for better controlling HMPV  
30  
31 240 infection.  
32  
33  
34  
35  
36  
37

38 241 HMPV co-infection with other respiratory pathogens has been reported in  
39  
40 242 many studies, including RSV,<sup>40</sup> InfA,<sup>41</sup> InfB,<sup>42</sup> PIV,<sup>43</sup> ADV,<sup>43 44</sup> HBoV,<sup>45</sup> HCoV,<sup>43 46</sup>  
41  
42 243 HRV,<sup>43</sup> EV,<sup>43</sup> MP,<sup>41</sup> and CP.<sup>41</sup> In this study, most HMPV-positive patients had single  
43  
44 244 HMPV-detection (81.6%, 84/103), and there was no significant difference in the  
45  
46 245 HMPV positivity rate according to sex between single HMPV-positive and  
47  
48 246 co-pathogens-positive patients ( $p=0.469$ ). The co-detection rate was 18.4% (19/103),  
49  
50 247 and RSV (36.8%, 7/19) was the most frequently co-detected pathogen (**Table 1**),  
51  
52 248 which might be due to overlapping of seasonal distribution of these two pathogens.<sup>47</sup>  
53  
54  
55  
56  
57  
58  
59  
60

1  
2  
3  
4 249 Co-detection rates of HCoV-OC43, MP, HBoV, ADV, HRV, InfA, PIV2, and PIV3 were  
5  
6 250 over 5%, suggesting a broad range of respiratory pathogens could co-exist with  
7  
8 251 HMPV in ARI pediatric patients (**Table 1**).

9  
10 252 HMPV most commonly causes URTI and LRTI in young children. The clinical  
11  
12  
13 253 manifestations of HMPV-positive patients are similar to those of RSV-positive patients,  
14  
15 254 especially in young children,<sup>48-50</sup> and HMPV has been reported that the most frequent  
16  
17  
18 255 diagnoses of children hospitalized with HMPV infection were pneumonitis and  
19  
20 256 bronchiolitis.<sup>3 51 52</sup> In some studies, bronchiolitis and recurrent wheezing/pneumonia  
21  
22  
23 257 were the main clinical diagnosis,<sup>7 22 53 54</sup> while in other studies, bronchopneumonia,  
24  
25 258 bronchiolitis, and bronchial asthma exacerbation were the main clinical diagnosis.<sup>34</sup>  
26  
27  
28 259 Our study showed that 55.4% (56/101), 7.9% (8/101), and 10.9% (11/101) of  
29  
30 260 HMPV-positive patients were diagnosed with bronchopneumonia, bronchiolitis, and  
31  
32  
33 261 pneumonia by chest radiography, respectively. Of all clinical presentations, cough  
34  
35 262 (100.0%, 101/101), abnormal pulmonary breath sound (91.1%, 92/101), fever (88.1%,  
36  
37  
38 263 89/101), expectoration (77.2%, 78/101), coryza (50.5%, 51/101), and wheezing  
39  
40 264 (46.5%, 47/101) occurred frequently in HMPV-positive patients (**Table 2**), similar to  
41  
42 265 those reported previously.<sup>16 29 52 55</sup>

43  
44  
45 266 Most of the HMPV-positive patients had a fever (88.1%, 89/101); it appeared in  
46  
47 267 the single HMPV-positive patients more frequently than in the co-pathogens-positive  
48  
49 268 patients ( $p=0.037$ ) (**Table 2**). Although diarrhea was not a major symptom in  
50  
51  
52 269 HMPV-positive patients (7.0%, 7/101), but it had a higher incidence rate in  
53  
54  
55 270 co-pathogen-positive patients than in single HMPV-positive patients ( $p=0.018$ ),  
56  
57

1  
2  
3  
4 271 suggesting that diarrhea could be caused by other pathogens. No significant  
5  
6 272 difference was found in the other clinical presentations between single HMPV-positive  
7  
8 273 and co-pathogens-positive patients, similar to the results of a previous study.<sup>51</sup>  
9

10  
11 274 In this study, RSV (36.8%, 7/19) was the most frequently co-detected pathogen  
12  
13 275 in HMPV-positive patients (**Table 1**). Whether HMPV/RSV co-infection is more severe  
14  
15 276 than the respective mono-infections remains unclear. A previous study showed that  
16  
17 277 children with HMPV/RSV co-infection were more likely to develop pneumonia;  
18  
19 278 however, disease severity was not increased.<sup>53</sup> Conversely, Semple et al.<sup>56</sup> reported  
20  
21 279 that HMPV/RSV co-infection can cause more severe bronchiolitis in patients. In our  
22  
23 280 study, no significant difference in the diagnosis of pneumonia was observed between  
24  
25 281 single HMPV-positive and co-pathogens-positive patients. It has been confirmed that  
26  
27 282 a history of prematurity, particular age groups, and the presence of chronic diseases  
28  
29 283 increases the risk of severe LRTI among HMPV- and RSV-infected children.<sup>51</sup> Our  
30  
31 284 study also suggested that the clinical manifestations of HMPV infection are complex  
32  
33 285 and diverse; the data might be helpful in the diagnosis of HMPV.  
34  
35  
36  
37  
38  
39

40 286 The study had some limitations. Firstly, collection of symptoms and physical  
41  
42 287 findings in infants and young children often requires the experience of medical staff,  
43  
44 288 patient's cooperation, and the knowledge of patient's guardian; but it is still possible to  
45  
46 289 have incomplete or even false description of patients' manifestations. Secondly,  
47  
48 290 because our study mainly focused on HMPV, other common respiratory pathogens  
49  
50 291 including bacterial pathogens were not tested in all samples, and accordingly, our  
51  
52 292 study could not give a fully picture of respiratory pathogen infection in hospitalized  
53  
54  
55  
56  
57  
58  
59  
60



1  
2  
3 293 pediatric patients with ARI. Thirdly, the characteristics of HMPV-negative patients  
4  
5  
6 294 were not further analyzed because our study only focused on the epidemical and  
7  
8  
9 295 clinical features of HMPV positive cases. That might affect our understanding of the  
10  
11 296 clinical feature of HMPV-positive patients. Despite these shortcomings, our results  
12  
13 297 provide valuable insight into the epidemiological and clinical characteristics of HMPV  
14  
15  
16 298 present in patients hospitalized with acute respiratory illness (ARI) in a subtropical  
17  
18 299 region, Guangzhou, southern China.  
19  
20  
21  
22  
23  
24  
25  
26  
27  
28  
29  
30  
31  
32  
33  
34  
35  
36  
37  
38  
39  
40  
41  
42  
43  
44  
45  
46  
47  
48  
49  
50  
51  
52  
53  
54  
55  
56  
57  
58  
59  
60

1  
2  
3  
4  
5  
6  
7  
8  
9  
10  
11  
12  
13  
14  
15  
16  
17  
18  
19  
20  
21  
22  
23  
24  
25  
26  
27  
28  
29  
30  
31  
32  
33  
34  
35  
36  
37  
38  
39  
40  
41  
42  
43  
44  
45  
46  
47  
48  
49  
50  
51  
52  
53  
54  
55  
56  
57  
58  
59  
60

300 **Conclusions**

301 HMPV is a common respiratory pathogen in children with ARI in Guangzhou ,  
302 China, particularly in children from 3 month to 5 years old. HMPV epidemic has a  
303 seasonal variation. The clinical characteristics of HMPV infection has its own pattern  
304 in children aged from infants to juveniles. Bronchopneumonia is the major clinical  
305 diagnosis. In the future, our data should be taken into account when local public  
306 health authority and medical community try to manage HMPV infection in children.

For peer review only

1  
2  
3  
4 307 **Acknowledgements**  
5

6 308 We thank the study volunteers for their generous participation. We thank Yinghua  
7  
8 309 Zhou, Haiping Huang, Jing Zhang, and Jing Ma for technical assistance. We thank  
9  
10 310 Professor Xiaofeng Li and Dr. Zhengshi Lin for paper polishing.  
11  
12

13 311

14  
15  
16 312 **Contributors**  
17

18 313 RZ, WKL, LZ and DLL designed the study. LZ, DLL, WKL, SYQ, DX, XL and LTT  
19  
20 314 performed pathogen testing. DHC and WPT collected clinical data. All authors  
21  
22 315 participated in the data analysis. LZ, DLL, RZ and WKL drafted the manuscript. All  
23  
24 316 authors read and approved the final version of this manuscript.  
25  
26

27 317

28  
29  
30 318 **Funding**  
31

32  
33 319 This study was supported by The State Major Infectious Disease Research Program  
34  
35 320 (RZ) (2017ZX10103011-003), National Natural Science Foundation of China (WKL)  
36  
37 321 (31500143), Guangzhou Science and Technology Program key projects (RZ)  
38  
39 322 (201508020252). The funders had no role in study design, data collection and  
40  
41 323 analysis, decision to publish, or preparation of the manuscript.  
42  
43

44 324

45  
46  
47 325 **Competing interests**  
48

49 326 None declared.  
50

51 327

52  
53  
54 328 **Ethics approval**  
55

1  
2  
3  
4 329 The study was approved by The First Affiliated Hospital of Guangzhou Medical  
5  
6 330 University Ethics Committee. Informed written consent was obtained from parents or  
7  
8 331 legal guardians.  
9

10  
11 332

12  
13 333 **Data sharing statement**  
14

15  
16 334 No additional data are available.  
17

18 335  
19

20 336  
21  
22  
23  
24  
25  
26  
27  
28  
29  
30  
31  
32  
33  
34  
35  
36  
37  
38  
39  
40  
41  
42  
43  
44  
45  
46  
47  
48  
49  
50  
51  
52  
53  
54  
55  
56  
57  
58  
59  
60

337 **REFERENCES**

- 338 1. van den Hoogen BG, Herfst S, Sprong L, et al. Antigenic and genetic variability of human  
339 metapneumoviruses. *Emerg Infect Dis* 2004;10(4):658-66. doi: 10.3201/eid1004.030393
- 340 2. van den Hoogen BG, de Jong JC, Groen J, et al. A newly discovered human pneumovirus  
341 isolated from young children with respiratory tract disease. *Nat Med* 2001;7(6):719-24. doi:  
342 10.1038/89098
- 343 3. Boivin G, Abed Y, Pelletier G, et al. Virological features and clinical manifestations associated  
344 with human metapneumovirus: a new paramyxovirus responsible for acute respiratory-tract  
345 infections in all age groups. *J Infect Dis* 2002;186(9):1330-4. doi: 10.1086/344319
- 346 4. Falsey AR, Walsh EE. Viral pneumonia in older adults. *Clin Infect Dis* 2006;42(4):518-24. doi:  
347 10.1086/499955
- 348 5. Kahn JS. Epidemiology of human metapneumovirus. *Clin Microbiol Rev* 2006;19(3):546-57.  
349 doi: 10.1128/CMR.00014-06
- 350 6. Davis CR, Stockmann C, Pavia AT, et al. Incidence, Morbidity, and Costs of Human  
351 Metapneumovirus Infection in Hospitalized Children. *J Pediatric Infect Dis Soc*  
352 2016;5(3):303-11. doi: 10.1093/jpids/piv027
- 353 7. Edwards KM, Zhu Y, Griffin MR, et al. Burden of human metapneumovirus infection in  
354 young children. *N Engl J Med* 2013;368(7):633-43. doi: 10.1056/NEJMoa1204630
- 355 8. Foulongne V, Guyon G, Rodiere M, et al. Human metapneumovirus infection in young  
356 children hospitalized with respiratory tract disease. *Pediatr Infect Dis J* 2006;25(4):354-9. doi:  
357 10.1097/01.inf.0000207480.55201.f6
- 358 9. Heikkinen T, Osterback R, Peltola V, et al. Human metapneumovirus infections in children.  
359 *Emerg Infect Dis* 2008;14(1):101-6. doi: 10.3201/eid1401.070251
- 360 10. Nicholson KG, McNally T, Silverman M, et al. Rates of hospitalisation for influenza,  
361 respiratory syncytial virus and human metapneumovirus among infants and young children.  
362 *Vaccine* 2006;24(1):102-8. doi: 10.1016/j.vaccine.2005.02.004
- 363 11. Sloots TP, Mackay IM, Bialasiewicz S, et al. Human metapneumovirus, Australia, 2001-2004.  
364 *Emerg Infect Dis* 2006;12(8):1263-6. doi: 10.3201/eid1208.051239
- 365 12. Williams JV, Edwards KM, Weinberg GA, et al. Population-based incidence of human  
366 metapneumovirus infection among hospitalized children. *J Infect Dis* 2010;201(12):1890-8.  
367 doi: 10.1086/652782
- 368 13. Ebihara T, Endo R, Kikuta H, et al. Seroprevalence of human metapneumovirus in Japan. *J*  
369 *Med Virol* 2003;70(2):281-3. doi: 10.1002/jmv.10391
- 370 14. Panda S, Mohakud NK, Pena L, et al. Human metapneumovirus: review of an important  
371 respiratory pathogen. *Int J Infect Dis* 2014;25:45-52. doi: 10.1016/j.ijid.2014.03.1394
- 372 15. Broor S, Bharaj P, Chahar HS. Human metapneumovirus: a new respiratory pathogen. *J*  
373 *Biosci* 2008;33(4):483-93.
- 374 16. Jain B, Singh AK, Dangi T, et al. High prevalence of human metapneumovirus subtype B in  
375 cases presenting as severe acute respiratory illness: an experience at tertiary care hospital. *Clin*  
376 *Respir J* 2014;8(2):225-33. doi: 10.1111/crj.12064
- 377 17. Liu WK, Liu Q, Chen DH, et al. Epidemiology and clinical presentation of the four human  
378 parainfluenza virus types. *BMC Infect Dis* 2013;13:28. doi: 10.1186/1471-2334-13-28
- 379 18. Liu WK, Chen DH, Liu Q, et al. Detection of human bocavirus from children and adults with  
380 acute respiratory tract illness in Guangzhou, southern China. *BMC Infect Dis* 2011;11:345. doi:

- 1  
2  
3 381 10.1186/1471-2334-11-345  
4 382 19. Liu W, Chen D, Tan W, et al. Epidemiology and Clinical Presentations of Respiratory  
5 383 Syncytial Virus Subgroups A and B Detected with Multiplex Real-Time PCR. *PLoS One*  
6 384 2016;11(10):e0165108. DOI: 10.1371/journal.pone.08. doi: 10.1371/journal.pone.0165108  
7  
8 385 20. Williams BG, Gouws E, Boschi-Pinto C, et al. Estimates of world-wide distribution of child  
9 386 deaths from acute respiratory infections. *Lancet Infect Dis* 2002;2(1):25-32.  
10 387 21. Escobar C, Luchsinger V, de Oliveira DB, et al. Genetic variability of human  
11 388 metapneumovirus isolated from Chilean children, 2003-2004. *J Med Virol* 2009;81(2):340-4.  
12 389 doi: 10.1002/jmv.21399  
13  
14 390 22. Garcia-Garcia ML, Calvo C, Rey C, et al. Human metapneumovirus infections in hospitalized  
15 391 children and comparison with other respiratory viruses. 2005-2014 prospective study. *PLoS*  
16 392 *One* 2017;12(3):e0173504. DOI: 10.1371/journal.pone.04. doi: 10.1371/journal.pone.0173504  
17 393 23. Ljubin-Sternak S, Santak M, Cepin-Bogovic J, et al. Detection of genetic lineages of human  
18 394 metapneumovirus in Croatia during the winter season 2005/2006. *J Med Virol*  
19 395 2008;80(7):1282-7. doi: 10.1002/jmv.21196  
20 396 24. McCracken JP, Arvelo W, Ortiz J, et al. Comparative epidemiology of human  
21 397 metapneumovirus- and respiratory syncytial virus-associated hospitalizations in Guatemala.  
22 398 *Influenza Other Respir Viruses* 2014;8(4):414-21. doi: 10.1111/irv.12251  
23 399 25. Nor'e SS, Sam IC, Mohamad Fakri EF, et al. Phylogenetic analysis of human  
24 400 metapneumovirus among children with acute respiratory infections in Kuala Lumpur,  
25 401 Malaysia. *Trop Biomed* 2014;31(3):562-6.  
26 402 26. Ordas J, Boga JA, Alvarez-Arguelles M, et al. Role of metapneumovirus in viral respiratory  
27 403 infections in young children. *J Clin Microbiol* 2006;44(8):2739-42. doi:  
28 404 10.1128/JCM.00164-06  
29 405 27. Rafiefard F, Yun Z, Orvell C. Epidemiologic characteristics and seasonal distribution of  
30 406 human metapneumovirus infections in five epidemic seasons in Stockholm, Sweden,  
31 407 2002-2006. *J Med Virol* 2008;80(9):1631-8. doi: 10.1002/jmv.21242  
32 408 28. Rodriguez PE, Adamo MP, Paglini MG, et al. [Mono-infection of human Metapneumovirus in  
33 409 Cordoba: first clinical and epidemiological research in children with respiratory infection in  
34 410 2011]. *Rev Fac Cien Med Univ Nac Cordoba* 2016;73(3):170-75.  
35 411 29. Zeng SZ, Xiao NG, Zhong LL, et al. Clinical features of human metapneumovirus genotypes  
36 412 in children with acute lower respiratory tract infection in Changsha, China. *J Med Virol*  
37 413 2015;87(11):1839-45. doi: 10.1002/jmv.24249  
38 414 30. Zhu RN, Qian Y, Zhao LQ, et al. Characterization of human metapneumovirus from pediatric  
39 415 patients with acute respiratory infections in a 4-year period in Beijing, China. *Chin Med J*  
40 416 *(Engl)* 2011;124(11):1623-8.  
41 417 31. Cai XY, Wang Q, Lin GY, et al. Respiratory virus infections among children in South China. *J*  
42 418 *Med Virol* 2014;86(7):1249-55. doi: 10.1002/jmv.23931  
43 419 32. Matsuzaki Y, Itagaki T, Abiko C, et al. Clinical impact of human metapneumovirus genotypes  
44 420 and genotype-specific seroprevalence in Yamagata, Japan. *J Med Virol* 2008;80(6):1084-9. doi:  
45 421 10.1002/jmv.21194  
46 422 33. Barbosa Ramirez J, Pulido Dominguez P, Rey Benito G, et al. Human respiratory syncytial  
47 423 virus and metapneumovirus in patients with acute respiratory infection in Colombia, 2000 -  
48 424 2011. *Rev Panam Salud Publica* 2014;36(2):101-9.

- 1  
2  
3 425 34. Zhang C, Du LN, Zhang ZY, et al. Detection and genetic diversity of human  
4 426 metapneumovirus in hospitalized children with acute respiratory infections in Southwest  
5 427 China. *J Clin Microbiol* 2012;50(8):2714-9. doi: 10.1128/JCM.00809-12  
6  
7 428 35. McAdam AJ, Hasenbein ME, Feldman HA, et al. Human metapneumovirus in children tested  
8 429 at a tertiary-care hospital. *J Infect Dis* 2004;190(1):20-6. doi: 10.1086/421120  
9 430 36. Boivin G, De Serres G, Cote S, et al. Human metapneumovirus infections in hospitalized  
10 431 children. *Emerg Infect Dis* 2003;9(6):634-40. doi: 10.3201/eid0906.030017  
11 432 37. Maggi F, Pifferi M, Vatteroni M, et al. Human metapneumovirus associated with respiratory  
12 433 tract infections in a 3-year study of nasal swabs from infants in Italy. *J Clin Microbiol*  
13 434 2003;41(7):2987-91.  
14  
15 435 38. van den Hoogen BG, van Doornum GJ, Fockens JC, et al. Prevalence and clinical symptoms  
16 436 of human metapneumovirus infection in hospitalized patients. *J Infect Dis*  
17 437 2003;188(10):1571-7. doi: 10.1086/379200  
18  
19 438 39. Peiris JS, Tang WH, Chan KH, et al. Children with respiratory disease associated with  
20 439 metapneumovirus in Hong Kong. *Emerg Infect Dis* 2003;9(6):628-33. doi:  
21 440 10.3201/eid0906.030009  
22 441 40. Greensill J, McNamara PS, Dove W, et al. Human metapneumovirus in severe respiratory  
23 442 syncytial virus bronchiolitis. *Emerg Infect Dis* 2003;9(3):372-5. doi: 10.3201/eid0903.020289  
24 443 41. Lin PY, Lin TY, Huang YC, et al. Human metapneumovirus and community-acquired  
25 444 pneumonia in children. *Chang Gung Med J* 2005;28(10):683-8.  
26  
27 445 42. Ghattas C, Mossad SB. Fatal human metapneumovirus and influenza B virus coinfection in an  
28 446 allogeneic hematopoietic stem cell transplant recipient. *Transpl Infect Dis*  
29 447 2012;14(5):E41-3. DOI: 10.1111/j.1399-3062.2012.00766.x. doi:  
30 448 10.1111/j.1399-3062.2012.00766.x  
31  
32 449 43. Fathima S, Lee BE, May-Hadford J, et al. Use of an innovative web-based laboratory  
33 450 surveillance platform to analyze mixed infections between human metapneumovirus (hMPV)  
34 451 and other respiratory viruses circulating in Alberta (AB), Canada (2009-2012). *Viruses*  
35 452 2012;4(11):2754-65. doi: 10.3390/v4112754  
36  
37 453 44. Kaida A, Kubo H, Goto K, et al. Co-infection of human metapneumovirus with adenovirus or  
38 454 respiratory syncytial virus among children in Japan. *Microbiol Immunol* 2007;51(7):679-83.  
39  
40 455 45. Pilger DA, Cantarelli VV, Amantea SL, et al. Detection of human bocavirus and human  
41 456 metapneumovirus by real-time PCR from patients with respiratory symptoms in Southern  
42 457 Brazil. *Mem Inst Oswaldo Cruz* 2011;106(1):56-60.  
43  
44 458 46. Esposito S, Daleno C, Prunotto G, et al. Impact of viral infections in children with  
45 459 community-acquired pneumonia: results of a study of 17 respiratory viruses. *Influenza Other*  
46 460 *Respir Viruses* 2013;7(1):18-26. doi: 10.1111/j.1750-2659.2012.00340.x  
47  
48 461 47. Kahn JS. Newly discovered respiratory viruses: significance and implications. *Curr Opin*  
49 462 *Pharmacol* 2007;7(5):478-83. doi: 10.1016/j.coph.2007.07.004  
50  
51 463 48. Wolf DG, Greenberg D, Kalkstein D, et al. Comparison of human metapneumovirus,  
52 464 respiratory syncytial virus and influenza A virus lower respiratory tract infections in  
53 465 hospitalized young children. *Pediatr Infect Dis J* 2006;25(4):320-4. doi:  
54 466 10.1097/01.inf.0000207395.80657.cf  
55  
56 467 49. Wilkesmann A, Schildgen O, Eis-Hubinger AM, et al. Human metapneumovirus infections  
57 468 cause similar symptoms and clinical severity as respiratory syncytial virus infections. *Eur J*

- 1  
2  
3 469 *Pediatr* 2006;165(7):467-75. doi: 10.1007/s00431-006-0105-4
- 4 470 50. Adams O, Weis J, Jasinska K, et al. Comparison of human metapneumovirus, respiratory  
5 471 syncytial virus and Rhinovirus respiratory tract infections in young children admitted to  
6 472 hospital. *J Med Virol* 2015;87(2):275-80. doi: 10.1002/jmv.24025
- 7  
8 473 51. Moe N, Krokstad S, Stenseng IH, et al. Comparing Human Metapneumovirus and Respiratory  
9 474 Syncytial Virus: Viral Co-Detections, Genotypes and Risk Factors for Severe Disease. *PLoS*  
10 475 *One* 2017;12(1):e0170200.DOI: 10.1371/journal.pone.00. doi: 10.1371/journal.pone.0170200
- 11 476 52. Yan XL, Li YN, Tang YJ, et al. Clinical characteristics and viral load of respiratory syncytial  
12 477 virus and human metapneumovirus in children hospitalized for acute lower respiratory tract  
13 478 infection. *J Med Virol* 2017;89(4):589-97. doi: 10.1002/jmv.24687
- 14  
15 479 53. Caracciolo S, Minini C, Colombrita D, et al. Human metapneumovirus infection in young  
16 480 children hospitalized with acute respiratory tract disease: virologic and clinical features.  
17 481 *Pediatr Infect Dis J* 2008;27(5):406-12. doi: 10.1097/INF.0b013e318162a164
- 18 482 54. Williams JV, Harris PA, Tollefson SJ, et al. Human metapneumovirus and lower respiratory  
19 483 tract disease in otherwise healthy infants and children. *N Engl J Med* 2004;350(5):443-50. doi:  
20 484 10.1056/NEJMoa025472
- 21  
22 485 55. Schuster JE, Khuri-Bulos N, Faouri S, et al. Human Metapneumovirus Infection in Jordanian  
23 486 Children: Epidemiology and Risk Factors for Severe Disease. *Pediatr Infect Dis J*  
24 487 2015;34(12):1335-41. doi: 10.1097/INF.0000000000000892
- 25  
26 488 56. Semple MG, Cowell A, Dove W, et al. Dual infection of infants by human metapneumovirus  
27 489 and human respiratory syncytial virus is strongly associated with severe bronchiolitis. *J Infect*  
28 490 *Dis* 2005;191(3):382-6. doi: 10.1086/426457
- 29  
30 491



1  
2  
3  
4 492 **Figure legends**

5  
6 493

7  
8 494 **Figure 1** Age distributions of patients with HMPV.

9  
10 495 <sup>a</sup>Date were presented as HMPV positive rate (number of HMPV-positive  
11 patients/number of patients in each age group); m: month(s); y: year(s).  
12  
13 496

14  
15 497

16  
17  
18 498 **Figure 2** Seasonal distribution of HMPV infection in pediatric patients hospitalized  
19 with acute respiratory infection from July 2013 to June 2016 in Guangzhou.  
20 499  
21  
22  
23  
24  
25  
26  
27  
28  
29  
30  
31  
32  
33  
34  
35  
36  
37  
38  
39  
40  
41  
42  
43  
44  
45  
46  
47  
48  
49  
50  
51  
52  
53  
54  
55  
56  
57  
58  
59  
60

500

**Table 1. Distribution of co-pathogens in 19 HMPV-positive patients**

| Co-pathogens <sup>a</sup> | Patient No. |
|---------------------------|-------------|
| RSV/HMPV                  | 4           |
| HCoV-OC43/HMPV            | 3           |
| ADV/HMPV                  | 2           |
| HRV/HMPV                  | 2           |
| MP/HMPV                   | 1           |
| PIV2/HMPV                 | 1           |
| PIV3/HMPV                 | 1           |
| RSV/MP/HMPV               | 1           |
| RSV/InfA/HMPV             | 1           |
| RSV/HBoV/HMPV             | 1           |
| MP/HBoV/HMPV              | 1           |
| InfA/HBoV/HMPV            | 1           |

501 <sup>a</sup>HMPV-positive patients were tested for 17 common respiratory pathogens.

502 InfB, PIV1, PIV4, EV, HCoV-HKU1, HCoV-229E, HCoV-NL63, CP were not detected.

503

504

505

**Table 2. Clinical presentations in HMPV-positive patients**

| Diagnosis/Symptom                               | Total HMPV<br>(n=101) | Patients with single HMPV and<br>co-pathogens |                         |                         |
|-------------------------------------------------|-----------------------|-----------------------------------------------|-------------------------|-------------------------|
|                                                 |                       | Single HMPV<br>(n = 83)                       | Co-pathogens<br>(n= 18) | p<br>value <sup>b</sup> |
| <b>URTI</b>                                     |                       |                                               |                         |                         |
| Nasal obstruction                               | 40(39.6)              | 34(41.0)                                      | 6(33.3)                 | 0.605                   |
| Coryza                                          | 51(50.5)              | 44(53.0)                                      | 7(38.9)                 | 0.309                   |
| Sneeze                                          | 1(1.0)                | 1(1.2)                                        | 0(0)                    | — <sup>c</sup>          |
| Cough                                           | 101(100)              | 83(100)                                       | 18(100)                 | — <sup>d</sup>          |
| Expectoration                                   | 78(77.2)              | 66(79.5)                                      | 12(66.7)                | 0.351                   |
| Pharyngeal discomfort                           | 2(2.0)                | 2(2.4)                                        | 0(0)                    | — <sup>c</sup>          |
| Hoarseness                                      | 1(1.0)                | 1(1.2)                                        | 0(0)                    | — <sup>c</sup>          |
| <b>LRTI</b>                                     |                       |                                               |                         |                         |
| Abnormal pulmonary<br>breath sound <sup>a</sup> | 92(91.1)              | 75(90.4)                                      | 17(94.4)                | 0.582                   |
| Increasing lung markings                        | 6(6.0)                | 4(4.8)                                        | 2(11.1)                 | 0.29                    |
| wheezing                                        | 47(46.5)              | 40(48.2)                                      | 7(38.9)                 | 0.473                   |
| anhelation                                      | 24(23.8)              | 21(25.3)                                      | 3(16.7)                 | 0.551                   |
| Bronchiolitis                                   | 8(7.9)                | 7(8.4)                                        | 1(5.6)                  | 0.682                   |
| Pneumonia                                       | 11(10.9)              | 10(12.1)                                      | 1(5.6)                  | 0.684                   |
| bronchopneumonia                                | 56(55.4)              | 46(55.4)                                      | 10(55.6)                | 0.992                   |
| <b>Systemic influenza-like symptoms</b>         |                       |                                               |                         |                         |
| Fever (≥38°C)                                   | 89(88.1)              | 76(91.6)                                      | 13(72.2)                | <b>0.037</b>            |
| Chill                                           | 7(6.9)                | 6(7.2)                                        | 1(5.6)                  | 0.8                     |
| Debilitation                                    | 11(10.9)              | 11(13.3)                                      | 0(0)                    | — <sup>c</sup>          |
| <b>Gastrointestinal illness</b>                 |                       |                                               |                         |                         |
| Vomiting                                        | 21(20.8)              | 16(19.3)                                      | 5(27.8)                 | 0.522                   |
| Poor appetite                                   | 19(18.8)              | 17(20.5)                                      | 2(11.1)                 | 0.513                   |
| Diarrhea                                        | 7(7.0)                | 3(3.6)                                        | 4(22.2)                 | <b>0.018</b>            |

506 Data are presented as No. (%) of each group.

507 Percentages sum to >100% because some patients had >1 clinical presentations.

508 <sup>a</sup>Including phlegmatic rales, wheezing rales, bubbling rales, and moist rales.

509 <sup>b</sup>Two-tailed  $\chi^2$  test comparing the distribution of each illness or diagnosis between  
510 HMPV mono- and co-infected patients.

511 <sup>c</sup>Not tested because the number of positive samples obtained was small.

512 <sup>d</sup>Not tested because the rate of positive samples obtained was 100%.

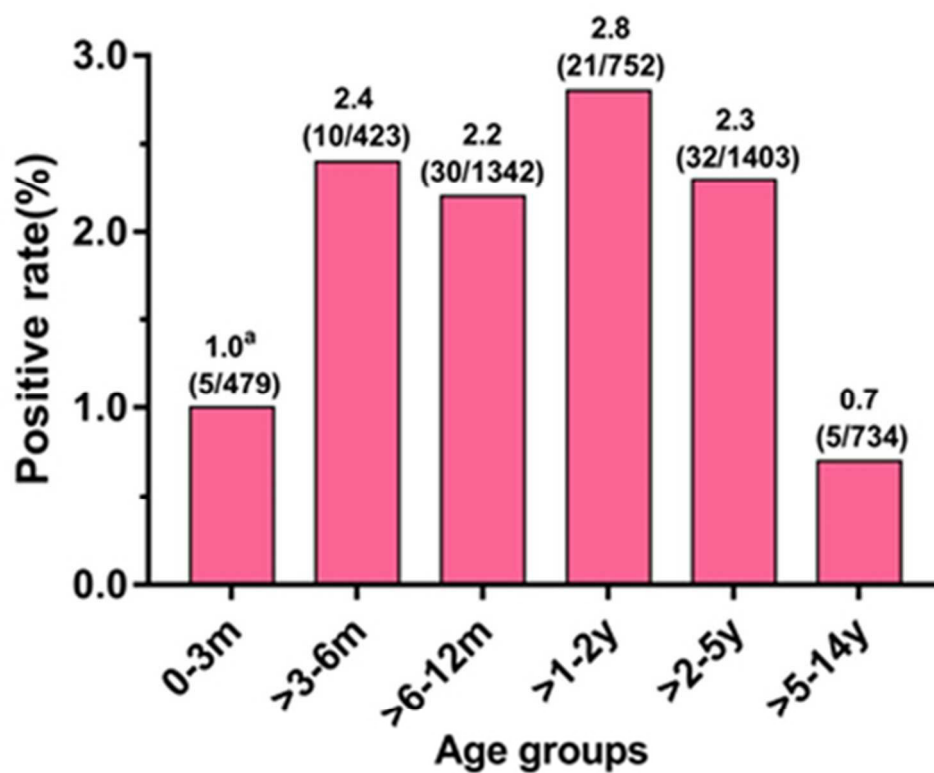

Figure 1 Age distributions of patients with HMPV.

<sup>a</sup>Data were presented as HMPV positive rate (number of HMPV-positive patients/number of patients in each age group); m: month(s); y: year(s).

42x35mm (300 x 300 DPI)

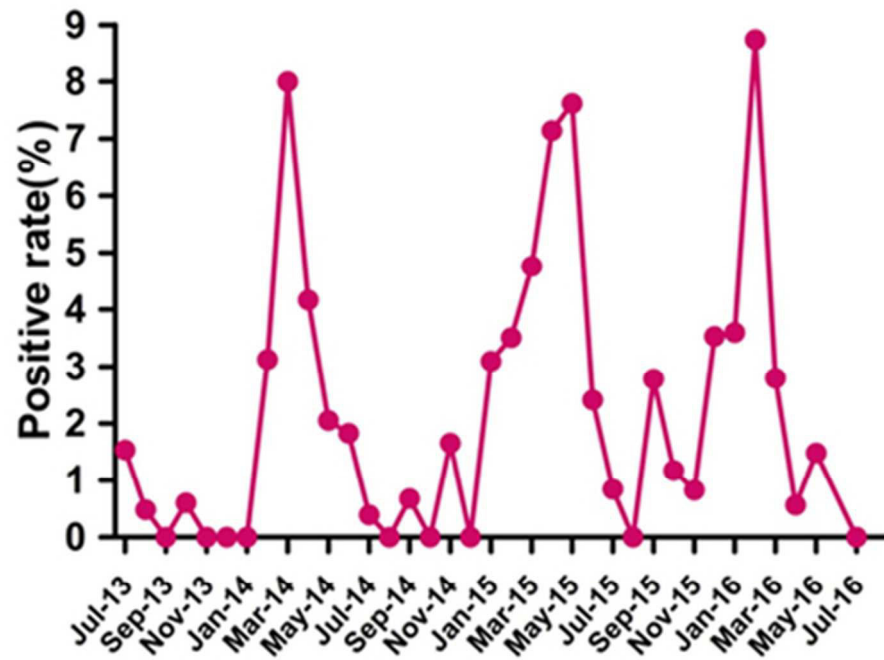

Figure 2 Seasonal distribution of HMPV infection in pediatric patients hospitalized with acute respiratory infection from July 2013 to June 2016 in Guangzhou.

39x31mm (300 x 300 DPI)

**STROBE 2007 (v4) Statement—Checklist of items that should be included in reports of *cross-sectional studies***

| Section/Topic                | Item # | Recommendation                                                                                                                                                                       | Reported on page # |
|------------------------------|--------|--------------------------------------------------------------------------------------------------------------------------------------------------------------------------------------|--------------------|
| <b>Title and abstract</b>    | 1      | (a) Indicate the study's design with a commonly used term in the title or the abstract                                                                                               | 1                  |
|                              |        | (b) Provide in the abstract an informative and balanced summary of what was done and what was found                                                                                  | 2-3                |
| <b>Introduction</b>          |        |                                                                                                                                                                                      |                    |
| Background/rationale         | 2      | Explain the scientific background and rationale for the investigation being reported                                                                                                 | 4                  |
| Objectives                   | 3      | State specific objectives, including any prespecified hypotheses                                                                                                                     | 4-5                |
| <b>Methods</b>               |        |                                                                                                                                                                                      |                    |
| Study design                 | 4      | Present key elements of study design early in the paper                                                                                                                              | 6                  |
| Setting                      | 5      | Describe the setting, locations, and relevant dates, including periods of recruitment, exposure, follow-up, and data collection                                                      | 6                  |
| Participants                 | 6      | (a) Give the eligibility criteria, and the sources and methods of selection of participants                                                                                          | 6                  |
| Variables                    | 7      | Clearly define all outcomes, exposures, predictors, potential confounders, and effect modifiers. Give diagnostic criteria, if applicable                                             | 6-7                |
| Data sources/<br>measurement | 8*     | For each variable of interest, give sources of data and details of methods of assessment (measurement). Describe comparability of assessment methods if there is more than one group | 7                  |
| Bias                         | 9      | Describe any efforts to address potential sources of bias                                                                                                                            | 6                  |
| Study size                   | 10     | Explain how the study size was arrived at                                                                                                                                            | 6                  |
| Quantitative variables       | 11     | Explain how quantitative variables were handled in the analyses. If applicable, describe which groupings were chosen and why                                                         | 7-8                |
| Statistical methods          | 12     | (a) Describe all statistical methods, including those used to control for confounding                                                                                                | 8                  |
|                              |        | (b) Describe any methods used to examine subgroups and interactions                                                                                                                  | 8                  |
|                              |        | (c) Explain how missing data were addressed                                                                                                                                          | 7                  |
|                              |        | (d) If applicable, describe analytical methods taking account of sampling strategy                                                                                                   | 8                  |
|                              |        | (e) Describe any sensitivity analyses                                                                                                                                                |                    |
| <b>Results</b>               |        |                                                                                                                                                                                      |                    |

|                          |     |                                                                                                                                                                                                              |       |
|--------------------------|-----|--------------------------------------------------------------------------------------------------------------------------------------------------------------------------------------------------------------|-------|
| Participants             | 13* | (a) Report numbers of individuals at each stage of study—eg numbers potentially eligible, examined for eligibility, confirmed eligible, included in the study, completing follow-up, and analysed            | 9     |
|                          |     | (b) Give reasons for non-participation at each stage                                                                                                                                                         | 10    |
|                          |     | (c) Consider use of a flow diagram                                                                                                                                                                           |       |
| Descriptive data         | 14* | (a) Give characteristics of study participants (eg demographic, clinical, social) and information on exposures and potential confounders                                                                     | 9-11  |
|                          |     | (b) Indicate number of participants with missing data for each variable of interest                                                                                                                          | 9     |
| Outcome data             | 15* | Report numbers of outcome events or summary measures                                                                                                                                                         | 9-11  |
| Main results             | 16  | (a) Give unadjusted estimates and, if applicable, confounder-adjusted estimates and their precision (eg, 95% confidence interval). Make clear which confounders were adjusted for and why they were included | 9-11  |
|                          |     | (b) Report category boundaries when continuous variables were categorized                                                                                                                                    | 9-10  |
|                          |     | (c) If relevant, consider translating estimates of relative risk into absolute risk for a meaningful time period                                                                                             |       |
| Other analyses           | 17  | Report other analyses done—eg analyses of subgroups and interactions, and sensitivity analyses                                                                                                               |       |
| <b>Discussion</b>        |     |                                                                                                                                                                                                              |       |
| Key results              | 18  | Summarise key results with reference to study objectives                                                                                                                                                     | 12-15 |
| Limitations              | 19  | Discuss limitations of the study, taking into account sources of potential bias or imprecision. Discuss both direction and magnitude of any potential bias                                                   | 15-16 |
| Interpretation           | 20  | Give a cautious overall interpretation of results considering objectives, limitations, multiplicity of analyses, results from similar studies, and other relevant evidence                                   | 12-16 |
| Generalisability         | 21  | Discuss the generalisability (external validity) of the study results                                                                                                                                        | 12-16 |
| <b>Other information</b> |     |                                                                                                                                                                                                              |       |
| Funding                  | 22  | Give the source of funding and the role of the funders for the present study and, if applicable, for the original study on which the present article is based                                                | 18    |

\*Give information separately for cases and controls in case-control studies and, if applicable, for exposed and unexposed groups in cohort and cross-sectional studies.

**Note:** An Explanation and Elaboration article discusses each checklist item and gives methodological background and published examples of transparent reporting. The STROBE checklist is best used in conjunction with this article (freely available on the Web sites of PLoS Medicine at <http://www.plosmedicine.org/>, Annals of Internal Medicine at <http://www.annals.org/>, and Epidemiology at <http://www.epidem.com/>). Information on the STROBE Initiative is available at [www.strobe-statement.org](http://www.strobe-statement.org).

# BMJ Open

## Epidemiology and clinical features of human metapneumovirus in hospitalized pediatric patients with acute respiratory illness: a cross-sectional study in southern China, from 2013 to 2016

|                                 |                                                                                                                                                                                                                                                                                                                                                                                                                                                                                                                                                                                                                                                                                                                                                                                                                                                                                                                                                                                                                                                                                                                                                                                                                                                                                                                                                                                                                                                                                        |
|---------------------------------|----------------------------------------------------------------------------------------------------------------------------------------------------------------------------------------------------------------------------------------------------------------------------------------------------------------------------------------------------------------------------------------------------------------------------------------------------------------------------------------------------------------------------------------------------------------------------------------------------------------------------------------------------------------------------------------------------------------------------------------------------------------------------------------------------------------------------------------------------------------------------------------------------------------------------------------------------------------------------------------------------------------------------------------------------------------------------------------------------------------------------------------------------------------------------------------------------------------------------------------------------------------------------------------------------------------------------------------------------------------------------------------------------------------------------------------------------------------------------------------|
| Journal:                        | <i>BMJ Open</i>                                                                                                                                                                                                                                                                                                                                                                                                                                                                                                                                                                                                                                                                                                                                                                                                                                                                                                                                                                                                                                                                                                                                                                                                                                                                                                                                                                                                                                                                        |
| Manuscript ID                   | bmjopen-2017-019308.R2                                                                                                                                                                                                                                                                                                                                                                                                                                                                                                                                                                                                                                                                                                                                                                                                                                                                                                                                                                                                                                                                                                                                                                                                                                                                                                                                                                                                                                                                 |
| Article Type:                   | Research                                                                                                                                                                                                                                                                                                                                                                                                                                                                                                                                                                                                                                                                                                                                                                                                                                                                                                                                                                                                                                                                                                                                                                                                                                                                                                                                                                                                                                                                               |
| Date Submitted by the Author:   | 22-Nov-2017                                                                                                                                                                                                                                                                                                                                                                                                                                                                                                                                                                                                                                                                                                                                                                                                                                                                                                                                                                                                                                                                                                                                                                                                                                                                                                                                                                                                                                                                            |
| Complete List of Authors:       | Zhang, Ling; State Key Laboratory of Respiratory Diseases, The First Affiliated Hospital of Guangzhou Medical University, Guangzhou Medical University<br>Liu, Donglan; State Key Laboratory of Respiratory Diseases, The First Affiliated Hospital of Guangzhou Medical University, Guangzhou Medical University<br>Chen, Dehui; Department of Pediatrics, The First Affiliated Hospital of Guangzhou Medical University, Guangzhou Medical University<br>Tan, Weiping ; Sun Yat-Sen Memorial Hospital, Sun Yat-Sen University<br>Qiu, Shuyan; State Key Laboratory of Respiratory Diseases, The First Affiliated Hospital of Guangzhou Medical University, Guangzhou Medical University<br>Xu, Duo; State Key Laboratory of Respiratory Diseases, The First Affiliated Hospital of Guangzhou Medical University, Guangzhou Medical University<br>Li, Xiao; State Key Laboratory of Respiratory Diseases, The First Affiliated Hospital of Guangzhou Medical University, Guangzhou Medical University<br>Liu, Tiantian; State Key Laboratory of Respiratory Diseases, The First Affiliated Hospital of Guangzhou Medical University, Guangzhou Medical University<br>Liu, Wenkuan; State Key Laboratory of Respiratory Diseases, The First Affiliated Hospital of Guangzhou Medical University, Guangzhou Medical University<br>Zhou, Rong; State Key Laboratory of Respiratory Diseases, The First Affiliated Hospital of Guangzhou Medical University, Guangzhou Medical University |
| <b>Primary Subject Heading</b>: | Infectious diseases                                                                                                                                                                                                                                                                                                                                                                                                                                                                                                                                                                                                                                                                                                                                                                                                                                                                                                                                                                                                                                                                                                                                                                                                                                                                                                                                                                                                                                                                    |
| Secondary Subject Heading:      | Epidemiology, Paediatrics, Infectious diseases                                                                                                                                                                                                                                                                                                                                                                                                                                                                                                                                                                                                                                                                                                                                                                                                                                                                                                                                                                                                                                                                                                                                                                                                                                                                                                                                                                                                                                         |
| Keywords:                       | Human metapneumovirus, Epidemiology < TROPICAL MEDICINE, Clinical feature, Acute respiratory illness                                                                                                                                                                                                                                                                                                                                                                                                                                                                                                                                                                                                                                                                                                                                                                                                                                                                                                                                                                                                                                                                                                                                                                                                                                                                                                                                                                                   |
|                                 |                                                                                                                                                                                                                                                                                                                                                                                                                                                                                                                                                                                                                                                                                                                                                                                                                                                                                                                                                                                                                                                                                                                                                                                                                                                                                                                                                                                                                                                                                        |



1  
2  
3  
4  
5  
6  
7  
8  
9  
10  
11  
12  
13  
14  
15  
16  
17  
18  
19  
20  
21  
22  
23  
24  
25  
26  
27  
28  
29  
30  
31  
32  
33  
34  
35  
36  
37  
38  
39  
40  
41  
42  
43  
44  
45  
46  
47  
48  
49  
50  
51  
52  
53  
54  
55  
56  
57  
58  
59  
60

SCHOLARONE™  
Manuscripts

For peer review only

1  
2  
3  
4 1 **Epidemiology and clinical features of human metapneumovirus in hospitalized**  
5  
6 2 **pediatric patients with acute respiratory illness: a cross-sectional study in**  
7  
8 3 **southern China, from 2013 to 2016**  
9  
10  
11  
12 4

13  
14 5 Ling Zhang<sup>1†</sup>, Donglan Liu<sup>1†</sup>, Dehui Chen<sup>2</sup>, Weiping Tan<sup>3</sup>, Shuyan Qiu<sup>1</sup>, Duo Xu<sup>1</sup>, Xiao  
15  
16 6 Li<sup>1</sup>, Tiantian Liu<sup>1</sup>, Wenkuan Liu<sup>1\*</sup>, Rong Zhou<sup>1\*</sup>  
17  
18  
19 7

20  
21 8 <sup>1</sup>State Key Laboratory of Respiratory Diseases, The First Affiliated Hospital of  
22  
23 9 Guangzhou Medical University, Guangzhou Medical University, Guangzhou,  
24  
25 10 People's Republic of China.  
26  
27

28  
29 11 <sup>2</sup>Department of Pediatrics, The First Affiliated Hospital of Guangzhou Medical  
30  
31 12 University, Guangzhou Medical University, Guangzhou, People's Republic of China.  
32  
33

34 13 <sup>3</sup>Sun Yat-Sen Memorial Hospital, Sun Yat-Sen University, Guangzhou, People's  
35  
36 14 Republic of China.  
37  
38

39 15  
40  
41 16 \*Correspondence to: Wenkuan Liu; [ahlwk2000-2004@163.com](mailto:ahlwk2000-2004@163.com) and Rong Zhou;  
42  
43 17 [zhourong@gird.cn](mailto:zhourong@gird.cn)  
44  
45

46 18 <sup>†</sup>Ling Zhang and Donglan Liu contributed equally to this work.  
47  
48  
49  
50  
51  
52  
53  
54  
55  
56  
57  
58  
59  
60

1  
2  
3  
4  
5  
6  
7  
8  
9  
10  
11  
12  
13  
14  
15  
16  
17  
18  
19  
20  
21  
22  
23  
24  
25  
26  
27  
28  
29  
30  
31  
32  
33  
34  
35  
36  
37  
38  
39  
40  
41  
42  
43  
44  
45  
46  
47  
48  
49  
50  
51  
52  
53  
54  
55  
56  
57  
58  
59  
60

19 **Abstract**

20 **Objectives:** Human metapneumovirus (HMPV) is one of the most important  
21 respiratory viral pathogens affecting infants and children worldwide. Our study was  
22 describes the epidemiological and clinical characteristics of HMPV present in patients  
23 hospitalized with acute respiratory illness (ARI) in Guangzhou, southern China.

24 **Study design:** A cross-sectional study.

25 **Setting:** Two tertiary hospitals in Guangzhou.

26 **Participants and methods:** Throat swabs were collected over a 3-year period from  
27 5133 pediatric patients ( $\leq 14$  years) hospitalized with ARI. HMPV-positive patients'  
28 clinical presentations (101/103) were recorded for further analysis.

29 **Results:** Of the 5133 patients included in the study, 103 (2.0%) were positive for  
30 HMPV. HMPV was more prevalent in children  $\leq 5$  years (2.2%, 98/4399) compared  
31 with older children ( $>5$ –14 years) (0.7%, 5/734) ( $p=0.004$ ). Two seasonal HMPV  
32 peaks were observed each year and mainly occurred in spring and early summer.  
33 Overall, 18.4% (19/103) of HMPV-positive patients were co-detected with other  
34 pathogens, most frequently respiratory syncytial virus (36.8%, 7/19). HMPV-positive  
35 patients presented with a wide spectrum of clinical features, including cough (100.0%,  
36 101/101), abnormal pulmonary breath sound (91.1%, 92/101), fever (88.1%, 89/101),  
37 expectoration (77.2%, 78/101), coryza (50.5%, 51/101) and wheezing (46.5%,  
38 47/101). The main diagnosis of HMPV-positive patients was bronchopneumonia  
39 (55.4%, 56/101). Fever ( $\geq 38^{\circ}\text{C}$ ) (91.6%, 76/83) was detected more often in patients  
40 with only HMPV detected than in patients with HMPV plus other pathogen(s) detected

1  
2  
3  
4 41 (72.2%, 13/18) ( $p=0.037$ ), whereas diarrhea was more common in patients with  
5  
6 42 HMPV plus other pathogen(s) detected (22.2%, 4/18), compared with patients with  
7  
8 43 HMPV only (3.6%, 3/83) ( $p=0.018$ ).

9  
10  
11 44 **Conclusions:** HMPV is an important respiratory pathogen in children with ARI in  
12  
13 45 Guangzhou, particularly in children  $\leq 5$  years old. HMPV has a seasonal variation.  
14  
15  
16 46 Bronchopneumonia is a major diagnosis in HMPV-positive patients.  
17

#### 18 19 20 21 48 **Strengths and limitations of this study**

- 22  
23 49 ● 5133 patients hospitalized with acute respiratory illness at two large municipal  
24  
25 50 tertiary hospitals (hospital beds > 1000) were enrolled on the study over 3 years.
- 26  
27  
28 51 ● Patients aged from 1 day to 14 years old were tested for HMPV using Taqman  
29  
30 52 real-time PCR.
- 31  
32  
33 53 ● Clinical characteristics of patients with HMPV-positive were recorded.
- 34  
35 54 ● There was incomplete HMPV co-pathogen detection, because bacterial  
36  
37 55 pathogens were not detected for HMPV-positive patients.
- 38  
39  
40 56 ● The clinical characteristics of HMPV-negative patients and outcome data  
41  
42 57 (discharge/death) for the HMPV-positive patients were not collected for further  
43  
44 58 analysis, limiting our understanding of this pathogen.

#### 45 46 47 48 49 50 60 **Introduction**

51  
52 61 Human metapneumovirus (HMPV) is a nonsegmented, negative-sense  
53  
54 62 single-stranded RNA virus, which belongs to the *Paramyxoviridae* family.<sup>1</sup> HMPV was

1  
2  
3  
4 63 first discovered in 2001 in the Netherlands, after being isolated from a pediatric patient  
5  
6 64 with acute respiratory illness (ARI).<sup>2</sup> Since then, HMPV has been associated with  
7  
8 65 acute respiratory disease in individuals of all ages worldwide. Children, elderly and  
9  
10 66 immunocompromised adults are most at risk of contracting the virus.<sup>3-5</sup> Children  
11  
12 67 younger than 5 years of age seem to be particularly susceptible to HMPV. Previous  
13  
14 68 studies,<sup>6-12</sup> which were mainly conducted in developed countries, have revealed that  
15  
16 69 approximately 2.5%–11.3% of respiratory samples were positive for HMPV in children  
17  
18 70 ≤5 years, and 90% of individuals were seropositive for HMPV by 5 years of age.<sup>13</sup>  
19  
20  
21  
22

23 HMPV causes a variety of clinical symptoms ranging from a mild upper  
24  
25 72 respiratory tract infection (URTI) to life-threatening lower respiratory tract infection  
26  
27  
28 73 (LRTI).<sup>3 14-16</sup> However, to date, there is no effective vaccine or specific medication  
29  
30 74 either for prevention or treatment of HMPV infection. Consequently, it is imperative to  
31  
32  
33 75 conduct more studies, especially in low and middle-income countries, to understand  
34  
35 76 this pathogen in different areas and populations.  
36  
37

38 In this study, we investigated the epidemiological and clinical features of HMPV  
39  
40 78 in pediatric patients, from July 2013 to June 2016. The findings of this study will help  
41  
42  
43 79 understand the distribution of HMPV in a subtropical region. Our results also provide a  
44  
45 80 valuable insight into the clinical features of HMPV, which will improve early clinical  
46  
47  
48 81 diagnosis.  
49  
50  
51  
52  
53  
54  
55  
56  
57  
58  
59  
60

## 82 **Methods**

### 83 **Study design and respiratory sample collection**

84 We conducted a cross-sectional study at two tertiary hospitals in Guangzhou,  
85 southern China. Throat swab samples (n=5133) from pediatric patients ( $\leq 14$  years)  
86 hospitalized with ARI, were collected at two hospitals between July 2013 and June  
87 2016. ARI was defined as an illness that presented with at least two of the following  
88 clinical presentations: cough, nasal obstruction, coryza, sneeze, dyspnoea during the  
89 previous week. Patients, who were diagnosed with pneumonia by chest radiography  
90 during the previous week, were also included in the study, even if they did not show  
91 the clinical features described above. Some patients, who had been cured and  
92 discharged some time ago and readmitted because of new episodes of ARI, if met the  
93 recruitment criteria, were included in the study as new cases, otherwise excluded.  
94 Chest radiography was performed based on the clinical situation of the patients. The  
95 samples were collected according to established clinical protocols.<sup>17</sup> The samples  
96 were refrigerated at 2–8°C in viral transport medium, transported on ice to the State  
97 Key Laboratory of Respiratory Diseases, and analyzed immediately or stored at -80°C  
98 before analysis as previously described.<sup>18</sup>

99 The patients' clinical presentations or diagnoses were recorded from patients'  
100 medical records by attending physicians, using designed presentation cards and were  
101 categorized retrospectively into the following four groups: URTI, LRTI, systemic  
102 influenza-like symptoms, and gastrointestinal illness. Patients with nasal obstruction,  
103 coryza, sneezing, coughing, expectoration, or hoarseness were categorized as

1  
2  
3 104 having URTI. Patients with bronchiolitis, pneumonia, bronchopneumonia, increased  
4  
5  
6 105 lung markings, dyspnea, or an abnormal pulmonary breath sound were categorized  
7  
8  
9 106 as having LRTI. Patients with a high fever ( $\geq 38^{\circ}\text{C}$ ), chills, or debilitation were  
10  
11 107 categorized as having systemic influenza-like symptoms. Patients with vomiting, poor  
12  
13 108 appetite, or diarrhea were categorized as having gastrointestinal illness. Some  
14  
15  
16 109 patients were assigned to several clinical presentation groups. Patients with  
17  
18 110 incomplete clinical data were excluded from this analysis. Increased lung markings,  
19  
20  
21 111 bronchopneumonia, pneumonia, and bronchiolitis were diagnosed by chest  
22  
23 112 radiography. Abnormal pulmonary breath sounds included phlegmatic, wheezy,  
24  
25  
26 113 bubbling, and moist rales. Other clinical symptoms were identified by a general  
27  
28 114 medical examination and clinical descriptions, as previously reported.<sup>19</sup>

29  
30  
31 115

### 32 33 116 **Real-time PCR for HMPV detection**

34  
35 117 RNA was extracted from the throat swab samples with the QIAamp Viral RNA  
36  
37  
38 118 Mini Kit (Qiagen, Shanghai, China), according to the manufacturer's protocols. HMPV  
39  
40 119 was identified by using TaqMan Real-time PCR assays, as previously reported,<sup>18</sup>  
41  
42  
43 120 using kits from Guangzhou HuYanSuo Medical Technology Co., Ltd according to the  
44  
45  
46 121 manufacturer's protocols. In brief, 50  $\mu\text{l}$  RNA were extracted from a 200  $\mu\text{l}$  sample,  
47  
48 122 and real-time PCR was conducted using 25  $\mu\text{l}$  reaction mix, containing M-MLV, Taq  
49  
50  
51 123 polymerase and 5  $\mu\text{l}$  extracted RNA. Cycling conditions included an initial reverse  
52  
53 124 transcription at  $55^{\circ}\text{C}$  for 10 min, incubation at  $94^{\circ}\text{C}$  for 2 min, followed by 40 cycles of  
54  
55 125  $94^{\circ}\text{C}$  for 10 sec and  $55^{\circ}\text{C}$  for 35 sec (ABI-7500 real-time PCR instrument, Life

1  
2  
3  
4 126 Technologies, Singapore).  
5  
6

7  
8  
9 127  
10

### 11 128 **Detection of common respiratory pathogens in HMPV-positive patients**

12  
13 129 HMPV-positive samples were tested simultaneously using TaqMan Real-time  
14  
15 130 PCR assays for the following 17 respiratory pathogens: respiratory syncytial virus  
16  
17 131 (RSV); parainfluenza virus types 1–4 (PIV1–4); influenza A and B viruses (InfA, InfB);  
18  
19 132 adenovirus (ADV); enterovirus (EV); human coronaviruses (HCoV-229E, HCoV-OC43,  
20  
21 133 HCoV-NL63, HCoV-HKU1); human rhinovirus (HRV); human bocavirus (HBoV);  
22  
23 134 *Mycoplasma pneumoniae* (MP); and *Chlamydomphila pneumoniae* (CP); The testing  
24  
25 135 procedure was conducted using kits from Guangzhou HuYanSuo Medical Technology  
26  
27  
28 136 Co., Ltd as previously described.<sup>18</sup>  
29

30  
31 137  
32

### 33 138 **Statistical analysis**

34  
35 139 All statistical analyses were performed with SPSS statistical software (version  
36  
37 140 19.0; SPSS Inc., Chicago, IL, USA). To compare categorical data,  $\chi^2$  and Fisher's  
38  
39 141 exact tests were used, as appropriate. All tests were two-tailed, and  $p < 0.05$  was  
40  
41  
42 142 considered statistically significant.  
43  
44  
45  
46  
47  
48  
49  
50  
51  
52  
53  
54  
55  
56  
57  
58  
59  
60



## 143 **Results**

### 144 **Detection of HMPV from patients with ARI**

145 In total, 5133 pediatric patients, ranging from 1 day to 14 years old were  
146 enrolled in this study. The male-to-female ratio was 1.75 (3269:1864) and the median  
147 age was 33 months (interquartile range, 9–48 months). Of the 5133 patients, 103  
148 (2.0%) were positive for HMPV. The male-to-female ratio was 1.86:1 (67:36) in  
149 HMPV-positive patients and 1.75:1 (3202:1828) in HMPV-negative patients ( $p=0.771$ ).  
150 The median age in months of HMPV-positive patients was 23.5 months (interquartile  
151 range, 10–36 months).

### 153 **Co-detection with common respiratory pathogens in HMPV-positive patients**

154 We also tested HMPV-positive samples for 17 common respiratory pathogens.  
155 Of the 103 HMPV-positive patients, 84 (81.6%) patients had only HMPV detection,  
156 and 19 (18.4%) patients had HMPV plus other pathogen(s) detected. Nine out of 17  
157 respiratory pathogens (52.9%) were detected and the most common co-detection  
158 pathogens were RSV (36.8%, 7/19), HCoV-OC43 (15.8%, 3/19), MP (15.8%, 3/19),  
159 and HBoV (15.8%, 3/19) (**Table 1**). The male-to-female ratio was 2:1 (56:28) in  
160 patients with only HMPV detected and 1.38:1 (11:8) in patients with HMPV plus other  
161 pathogen(s) detected ( $p=0.469$ ).

### 163 **Age distribution of HMPV-positive patients**

164 Overall, there was a significant difference in HMPV prevalence between

165 patients >5–14 years (0.7%, 5/734) and those ≤5 years (2.2%, 98/4399) ( $p=0.004$ ).

166 The patients were divided into six age groups: 0–3 months, >3–6 months, >6–12  
167 months, >1–2 years, >2–5 years, and >5–14 years. The distribution of HMPV  
168 prevalence between these age groups was significantly different ( $p=0.03$ ), and  
169 children >1–2 years had the highest prevalence (2.8%, 21/752) (**Figure 1**).

### 171 **Seasonal distribution of HMPV**

172 Over the 3-year study period, the prevalence of HMPV peaked twice every  
173 year (**Figure 2**). Large peaks occurred in March 2014 (8%, 16/200), May 2015 (7.6%,  
174 8/105) and February 2016 (8.7%, 9/103). Small peaks occurred in November 2014  
175 (1.7%, 2/121), September 2015 (2.8%, 2/72) and May 2016 (1.5%, 2/135) (**Figure 2**).

### 177 **Clinical presentation of HMPV-positive patients**

178 We analyzed the clinical presentation of 101 of the 103 (98.1%) HMPV-positive  
179 patients, the other two patients were excluded from this analysis because of  
180 incomplete clinical data. The main clinical features of HMPV-positive patients included  
181 cough (100.0%, 101/101), abnormal pulmonary breath sound (91.1%, 92/101), fever  
182 (88.1%, 89/101), expectoration (77.2%, 78/101), coryza (50.5%, 51/101) and  
183 wheezing (46.5%, 47/101). The main diagnosis by chest radiography was  
184 bronchopneumonia (55.4%, 56/101), followed by pneumonia (10.9%, 11/101) and  
185 bronchiolitis (7.9%, 8/101) (**Table 2**). We also compared the clinical features of  
186 patients with only HMPV detected and those of the patients with HMPV plus other

1  
2  
3  
4 187 pathogen(s) detected. Fever and diarrhea were the two symptoms that were identified  
5  
6 188 as statistically different between these two groups; A fever ( $\geq 38^{\circ}\text{C}$ ) was seen more  
7  
8 189 common in patients with only HMPV detected (91.6%, 76/83) , compared with 72.2%  
9  
10 190 (13/18) in patients with HMPV plus other pathogen(s) detected ( $p=0.037$ ). Conversely,  
11  
12  
13 191 diarrhea appeared more often in patients with HMPV plus other pathogen(s) detected  
14  
15 192 (22.2%, 4/18) than in the patients with only HMPV detected (3.6%, 3/83) ( $p=0.018$ )  
16  
17  
18 193 (**Table 2**).

1  
2  
3  
4 194 **Discussion**

5  
6 195 Viruses are the most frequent cause of respiratory infections.<sup>20</sup> HMPV has  
7  
8 196 been recognized as an important cause of ARI since its discovery in 2001. A previous  
9  
10 197 study reported HMPV was responsible for approximately 5–10% of hospitalizations in  
11  
12 198 children suffering from ARI,<sup>14</sup> creating a considerable clinical and economic burden  
13  
14 199 worldwide. HMPV detection rates vary according to geographic location, and the  
15  
16 200 incidence of HMPV may show seasonal or annual patterns in the same area. In  
17  
18 201 previous studies,<sup>21-30</sup> HMPV was detected in approximately 1%–17% of ARI cases. In  
19  
20 202 this 3 year study, 103 of 5133 (2.0%) patients were positive for HMPV, which is similar  
21  
22 203 to previous reports of HMPV in patients with ARI in southern China<sup>31</sup> and Japan.<sup>32</sup>

23  
24  
25 204 Children under 5 years of age are most susceptible to HMPV infection, and  
26  
27 205 those younger than 2 years of age are at the greatest risk of developing serious  
28  
29 206 conditions.<sup>15</sup> In our study, HMPV-positive cases appeared more frequently in patients  
30  
31 207 ≤5 year-old (2.2%, 98/4399) than in patients >5 year-old (0.7%, 5/734) ( $p=0.004$ ),  
32  
33 208 which is consistent with many previous studies.<sup>3 30 33 34</sup> Specifically, HMPV prevalence  
34  
35 209 was highest in children >1–2 years (2.8%, 21/752). This may be explained by the  
36  
37 210 immunity against HMPV, which is passed down from mother-to-child, gradually  
38  
39 211 subsiding over time. Moreover, children were more contact with outside world as they  
40  
41 212 grew older. Therefore, children of this age need more attention to prevent HMPV  
42  
43 213 infection. Moreover, our findings suggested no difference in risk between sex, there  
44  
45 214 was no significant difference in the HMPV prevalence between male and female  
46  
47 215 patients ( $p=0.771$ ), which is consistent with previous studies.<sup>35 36</sup>

1  
2  
3  
4 216 HMPV has a typical seasonal distribution. HMPV activity is largely affected by  
5  
6 217 different local climate factors. The prevalence of HMPV in temperate climates peaks  
7  
8 218 at the end of winter or in early spring.<sup>37 38</sup> In our study, seasonal peaks of HMPV were  
9  
10 219 detected in February 2016, March 2014 and May 2015. This finding indicates that  
11  
12 220 HMPV circulates primarily during the spring and early summer in Guangzhou, this  
13  
14 221 pattern is similar to previous reports from other subtropical areas.<sup>22 39</sup> Furthermore, we  
15  
16 222 also found small peaks in November 2014, September 2015, and May 2016, the  
17  
18 223 reason for this is unknown. It should be noted that the seasonal distribution of HMPV  
19  
20 224 overlaps with RSV in this geographical area.<sup>19</sup> Knowing the epidemiological  
21  
22 225 characteristics of HMPV will help public health authorities and clinicians to improve  
23  
24 226 strategies for controlling HMPV infection.

25  
26  
27  
28  
29  
30 227 HMPV co-infection with other respiratory pathogens has been reported in  
31  
32 228 many studies, including RSV,<sup>40</sup> InfA,<sup>41</sup> InfB,<sup>42</sup> PIV,<sup>43</sup> ADV,<sup>43 44</sup> HBoV,<sup>45</sup> HCoV,<sup>43 46</sup>  
33  
34 229 HRV,<sup>43</sup> EV,<sup>43</sup> MP,<sup>41</sup> and CP.<sup>41</sup> In our study, most HMPV-positive patients only had  
35  
36 230 HMPV (81.6%, 84/103), and there was no significant difference in the HMPV  
37  
38 231 prevalence according to sex between the patients with only HMPV detected and the  
39  
40 232 patients with HMPV plus other pathogen(s) detected ( $p=0.469$ ). The co-detection rate  
41  
42 233 was 18.4% (19/103), and RSV (36.8%, 7/19) was the most frequently co-detected  
43  
44 234 pathogen, which might be because of the overlapping seasonal distribution of these  
45  
46 235 two pathogens.<sup>47</sup> Co-detection rates of HCoV-OC43, MP, HBoV, ADV, HRV, InfA, PIV2,  
47  
48 236 and PIV3 were over 5%, suggesting a broad range of respiratory pathogens could  
49  
50 237 co-exist with HMPV in ARI pediatric patients.

1  
2  
3  
4 238 HMPV most commonly causes URTI and LRTI in young children. The clinical  
5  
6 239 manifestations of HMPV-positive patients are similar to those of RSV-positive patients,  
7  
8 240 especially in young children.<sup>48-50</sup> In previous studies, the most frequent diagnoses of  
9  
10 241 children hospitalized with HMPV infection were pneumonitis and bronchiolitis.<sup>3 51 52</sup> In  
11  
12 242 some studies, bronchiolitis and recurrent wheezing/pneumonia were the main clinical  
13  
14 243 diagnoses,<sup>7 22 53 54</sup> while in other studies, bronchopneumonia, bronchiolitis, and  
15  
16 244 bronchial asthma exacerbation were the main clinical diagnoses.<sup>34</sup> Our study showed  
17  
18 245 that 55.4% (56/101), 7.9% (8/101) and 10.9% (11/101) of HMPV-positive patients  
19  
20 246 were diagnosed with bronchopneumonia, bronchiolitis, and pneumonia by chest  
21  
22 247 radiography, respectively. Of all the clinical features recorded, cough (100.0%,  
23  
24 248 101/101), abnormal pulmonary breath sound (91.1%, 92/101), fever (88.1%, 89/101),  
25  
26 249 expectoration (77.2%, 78/101), coryza (50.5%, 51/101), and wheezing (46.5%,  
27  
28 250 47/101) occurred frequently in HMPV-positive patients, similar to those reported  
29  
30 251 previously.<sup>16 29 52 55</sup>

31  
32  
33  
34  
35  
36  
37 252 Most of the HMPV-positive patients had a fever (88.1%, 89/101); it appeared  
38  
39 253 more frequently in patients with only HMPV detected than in the patients with HMPV  
40  
41 254 plus other pathogen(s) detected ( $p=0.037$ ). Diarrhea was not a major symptom in  
42  
43 255 HMPV-positive patients (7.0%, 7/101), but it had a higher prevalence in patients with  
44  
45 256 HMPV plus other pathogen(s) detected than in the patients with only HMPV detected  
46  
47 257 ( $p=0.018$ ), suggesting that diarrhea is probably caused by other pathogens. No  
48  
49 258 significant difference was found in the other clinical features between the patients with  
50  
51 259 only HMPV detected and the patients with HMPV plus other pathogen(s) detected,  
52  
53  
54  
55  
56  
57  
58  
59  
60

1  
2  
3 260 similar to the results of a previous study.<sup>51</sup>  
4  
5

6 261 In our study, RSV (36.8%, 7/19) was the most frequently co-detected pathogen  
7  
8 262 in HMPV-positive patients. Whether HMPV/RSV co-infection is more severe than the  
9  
10 263 respective mono-infections remains unclear. A previous study showed that children  
11  
12 264 with HMPV/RSV co-infection were more likely to develop pneumonia; however,  
13  
14 265 disease severity was not increased.<sup>53</sup> Conversely, Semple et al.<sup>56</sup> reported that  
15  
16 266 HMPV/RSV co-infection can cause more severe bronchiolitis in patients. In our study,  
17  
18 267 no significant difference in the diagnosis of pneumonia was observed between the  
19  
20 268 patients with only HMPV detected and the patients with HMPV plus other pathogen(s)  
21  
22 269 detected. It has been confirmed that a history of prematurity, particular age groups,  
23  
24 270 and the presence of chronic diseases increases the risk of severe LRTI among  
25  
26 271 HMPV- and RSV-infected children.<sup>51</sup> Our study suggests that the clinical  
27  
28 272 manifestations of HMPV infection are complex and diverse; our data will be helpful in  
29  
30 273 the diagnosis of HMPV.  
31  
32  
33  
34  
35  
36  
37

38 274 The study had some limitations. First, collection of data on symptoms and  
39  
40 275 physical findings in infants and young children requires experienced medical staff,  
41  
42 276 patient's cooperation, and consent from the patient's guardian. Consequently, it is  
43  
44 277 possible we will have incomplete or even an inaccurate description of patients'  
45  
46 278 manifestations. Second, because our study mainly focused on HMPV, other common  
47  
48 279 respiratory pathogens, including bacterial pathogens, were not tested and  
49  
50 280 subsequently our study does not give a fully account of respiratory pathogen infection  
51  
52 281 in hospitalized pediatric patients with ARI. Third, the characteristics of HMPV-negative  
53  
54  
55  
56  
57  
58  
59  
60

1  
2  
3 282 patients and outcome data (discharge/death) were not analyzed further, because our  
4  
5  
6 283 study only focused on the epidemiological and clinical features of HMPV positive  
7  
8 284 cases. This might affect our understanding of the clinical features of HMPV-positive  
9  
10  
11 285 patients. Despite these shortcomings, our results provide a valuable insight into the  
12  
13 286 epidemiological and clinical characteristics of HMPV present in patients hospitalized  
14  
15  
16 287 with ARI in Guangzhou, southern China.  
17  
18  
19  
20  
21  
22  
23  
24  
25  
26  
27  
28  
29  
30  
31  
32  
33  
34  
35  
36  
37  
38  
39  
40  
41  
42  
43  
44  
45  
46  
47  
48  
49  
50  
51  
52  
53  
54  
55  
56  
57  
58  
59  
60



1  
2  
3  
4 288 **Conclusions**

5  
6 289 HMPV is an important respiratory pathogen in children with ARI in Guangzhou ,  
7  
8 290 China, particularly in children under 5 years old. In future, our data can be used by  
9  
10 291 public health authorities and clinicians to improve the management of HMPV infection  
11  
12  
13 292 in children.  
14  
15  
16  
17  
18  
19  
20  
21  
22  
23  
24  
25  
26  
27  
28  
29  
30  
31  
32  
33  
34  
35  
36  
37  
38  
39  
40  
41  
42  
43  
44  
45  
46  
47  
48  
49  
50  
51  
52  
53  
54  
55  
56  
57  
58  
59  
60

For peer review only

1  
2  
3  
4  
5  
6  
7  
8  
9  
10  
11  
12  
13  
14  
15  
16  
17  
18  
19  
20  
21  
22  
23  
24  
25  
26  
27  
28  
29  
30  
31  
32  
33  
34  
35  
36  
37  
38  
39  
40  
41  
42  
43  
44  
45  
46  
47  
48  
49  
50  
51  
52  
53  
54  
55  
56  
57  
58  
59  
60

293 **Acknowledgements**

294 We thank the study volunteers for their generous participation. We thank Yinghua  
295 Zhou, Haiping Huang, Jing Zhang, and Jing Ma for technical assistance. We thank  
296 Professor Xiaofeng Li and Dr. Zhengshi Lin for paper polishing.

297

298 **Contributors**

299 RZ, WKL, LZ and DLL designed the study. LZ, DLL, WKL, SYQ, DX, XL and LTT  
300 performed pathogen testing. DHC and WPT collected the clinical data. All authors  
301 participated in the data analysis. LZ, DLL, RZ and WKL drafted the manuscript. All  
302 authors read and approved the final version of this manuscript.

303

304 **Funding**

305 This study was supported by The State Major Infectious Disease Research Program  
306 (RZ) (2017ZX10103011-003), National Natural Science Foundation of China (WKL)  
307 (31500143), Guangzhou Science and Technology Program key projects (RZ)  
308 (201508020252). The funders had no role in study design, data collection and  
309 analysis, decision to publish, or preparation of the manuscript.

310

311 **Competing interests**

312 None declared.

313

314 **Ethics approval**

1  
2  
3 315 The study was approved by The First Affiliated Hospital of Guangzhou Medical  
4  
5  
6 316 University Ethics Committee. Informed written consent was obtained from parents or  
7  
8 317 legal guardians.  
9

10  
11 318

12  
13 319 **Data sharing statement**  
14

15  
16 320 No additional data are available.  
17

18 321  
19

20  
21 322  
22  
23  
24  
25  
26  
27  
28  
29  
30  
31  
32  
33  
34  
35  
36  
37  
38  
39  
40  
41  
42  
43  
44  
45  
46  
47  
48  
49  
50  
51  
52  
53  
54  
55  
56  
57  
58  
59  
60

323 **References**

- 324 1. van den Hoogen BG, Herfst S, Sprong L, et al. Antigenic and genetic  
325 variability of human metapneumoviruses. *Emerg Infect Dis* 2004;10(4):658-66.  
326 doi: 10.3201/eid1004.030393
- 327 2. van den Hoogen BG, de Jong JC, Groen J, et al. A newly discovered human  
328 pneumovirus isolated from young children with respiratory tract disease. *Nat*  
329 *Med* 2001;7(6):719-24. doi: 10.1038/89098
- 330 3. Boivin G, Abed Y, Pelletier G, et al. Virological features and clinical  
331 manifestations associated with human metapneumovirus: a new  
332 paramyxovirus responsible for acute respiratory-tract infections in all age  
333 groups. *J Infect Dis* 2002;186(9):1330-4. doi: 10.1086/344319
- 334 4. Falsey AR, Walsh EE. Viral pneumonia in older adults. *Clin Infect Dis*  
335 2006;42(4):518-24. doi: 10.1086/499955
- 336 5. Kahn JS. Epidemiology of human metapneumovirus. *Clin Microbiol Rev*  
337 2006;19(3):546-57. doi: 10.1128/CMR.00014-06
- 338 6. Davis CR, Stockmann C, Pavia AT, et al. Incidence, Morbidity, and Costs of  
339 Human Metapneumovirus Infection in Hospitalized Children. *J Pediatric Infect*  
340 *Dis Soc* 2016;5(3):303-11. doi: 10.1093/jpids/piv027
- 341 7. Edwards KM, Zhu Y, Griffin MR, et al. Burden of human metapneumovirus  
342 infection in young children. *N Engl J Med* 2013;368(7):633-43. doi:  
343 10.1056/NEJMoa1204630
- 344 8. Foulongne V, Guyon G, Rodiere M, et al. Human metapneumovirus infection

- 1  
2  
3  
4 345 in young children hospitalized with respiratory tract disease. *Pediatr Infect Dis*  
5  
6 346 *J* 2006;25(4):354-9. doi: 10.1097/01.inf.0000207480.55201.f6  
7  
8 347 9. Heikkinen T, Osterback R, Peltola V, et al. Human metapneumovirus  
9  
10 348 infections in children. *Emerg Infect Dis* 2008;14(1):101-6. doi:  
11  
12 349 10.3201/eid1401.070251  
13  
14  
15 350 10. Nicholson KG, McNally T, Silverman M, et al. Rates of hospitalisation for  
16  
17 351 influenza, respiratory syncytial virus and human metapneumovirus among  
18  
19 352 infants and young children. *Vaccine* 2006;24(1):102-8. doi:  
20  
21 353 10.1016/j.vaccine.2005.02.004  
22  
23  
24 354 11. Sloots TP, Mackay IM, Bialasiewicz S, et al. Human metapneumovirus,  
25  
26 355 Australia, 2001-2004. *Emerg Infect Dis* 2006;12(8):1263-6. doi:  
27  
28 356 10.3201/eid1208.051239  
29  
30  
31 357 12. Williams JV, Edwards KM, Weinberg GA, et al. Population-based incidence  
32  
33 358 of human metapneumovirus infection among hospitalized children. *J Infect Dis*  
34  
35 359 2010;201(12):1890-8. doi: 10.1086/652782  
36  
37  
38 360 13. Ebihara T, Endo R, Kikuta H, et al. Seroprevalence of human  
39  
40 361 metapneumovirus in Japan. *J Med Virol* 2003;70(2):281-3. doi:  
41  
42 362 10.1002/jmv.10391  
43  
44  
45 363 14. Panda S, Mohakud NK, Pena L, et al. Human metapneumovirus: review of  
46  
47 364 an important respiratory pathogen. *Int J Infect Dis* 2014;25:45-52. doi:  
48  
49 365 10.1016/j.ijid.2014.03.1394  
50  
51  
52 366 15. Broor S, Bharaj P, Chahar HS. Human metapneumovirus: a new respiratory  
53  
54  
55  
56  
57  
58  
59  
60

- 1  
2  
3  
4 367 pathogen. *J Biosci* 2008;33(4):483-93.  
5  
6 368 16. Jain B, Singh AK, Dangi T, et al. High prevalence of human  
7  
8 369 metapneumovirus subtype B in cases presenting as severe acute respiratory  
9  
10 370 illness: an experience at tertiary care hospital. *Clin Respir J* 2014;8(2):225-33.  
11  
12  
13 371 doi: 10.1111/crj.12064  
14  
15 372 17. Liu WK, Liu Q, Chen DH, et al. Epidemiology and clinical presentation of the  
16  
17 373 four human parainfluenza virus types. *BMC Infect Dis* 2013;13:28. doi:  
18  
19 374 10.1186/1471-2334-13-28  
20  
21  
22 375 18. Liu WK, Chen DH, Liu Q, et al. Detection of human bocavirus from children  
23  
24 376 and adults with acute respiratory tract illness in Guangzhou, southern China.  
25  
26 377 *BMC Infect Dis* 2011;11:345. doi: 10.1186/1471-2334-11-345  
27  
28  
29 378 19. Liu W, Chen D, Tan W, et al. Epidemiology and Clinical Presentations of  
30  
31 379 Respiratory Syncytial Virus Subgroups A and B Detected with Multiplex  
32  
33 380 Real-Time PCR. *PLoS One* 2016;11(10):e0165108. DOI:  
34  
35 381 10.1371/journal.pone.0165108. doi: 10.1371/journal.pone.0165108  
36  
37  
38 382 20. Williams BG, Gouws E, Boschi-Pinto C, et al. Estimates of world-wide  
39  
40 383 distribution of child deaths from acute respiratory infections. *Lancet Infect Dis*  
41  
42 384 2002;2(1):25-32.  
43  
44  
45 385 21. Escobar C, Luchsinger V, de Oliveira DB, et al. Genetic variability of human  
46  
47 386 metapneumovirus isolated from Chilean children, 2003-2004. *J Med Virol*  
48  
49 387 2009;81(2):340-4. doi: 10.1002/jmv.21399  
50  
51  
52 388 22. Garcia-Garcia ML, Calvo C, Rey C, et al. Human metapneumovirus  
53  
54  
55  
56  
57  
58  
59  
60

- 1  
2  
3  
4 389 infections in hospitalized children and comparison with other respiratory  
5  
6 390 viruses. 2005-2014 prospective study. *PLoS One* 2017;12(3):e0173504. DOI:  
7  
8 391 10.1371/journal.pone.04. doi: 10.1371/journal.pone.0173504  
9  
10  
11 392 23. Ljubin-Sternak S, Santak M, Cepin-Bogovic J, et al. Detection of genetic  
12  
13 393 lineages of human metapneumovirus in Croatia during the winter season  
14  
15 394 2005/2006. *J Med Virol* 2008;80(7):1282-7. doi: 10.1002/jmv.21196  
16  
17  
18 395 24. McCracken JP, Arvelo W, Ortiz J, et al. Comparative epidemiology of human  
19  
20 396 metapneumovirus- and respiratory syncytial virus-associated hospitalizations  
21  
22 397 in Guatemala. *Influenza Other Respir Viruses* 2014;8(4):414-21. doi:  
23  
24 398 10.1111/irv.12251  
25  
26  
27  
28 399 25. Nor'e SS, Sam IC, Mohamad Fakri EF, et al. Phylogenetic analysis of human  
29  
30 400 metapneumovirus among children with acute respiratory infections in Kuala  
31  
32 401 Lumpur, Malaysia. *Trop Biomed* 2014;31(3):562-6.  
33  
34  
35 402 26. Ordas J, Boga JA, Alvarez-Arguelles M, et al. Role of metapneumovirus in  
36  
37 403 viral respiratory infections in young children. *J Clin Microbiol*  
38  
39 404 2006;44(8):2739-42. doi: 10.1128/JCM.00164-06  
40  
41  
42 405 27. Rafiefard F, Yun Z, Orvell C. Epidemiologic characteristics and seasonal  
43  
44 406 distribution of human metapneumovirus infections in five epidemic seasons in  
45  
46 407 Stockholm, Sweden, 2002-2006. *J Med Virol* 2008;80(9):1631-8. doi:  
47  
48 408 10.1002/jmv.21242  
49  
50  
51  
52 409 28. Rodriguez PE, Adamo MP, Paglini MG, et al. [Mono-infection of human  
53  
54 410 Metapneumovirus in Cordoba: first clinical and epidemiological research in  
55  
56  
57  
58  
59  
60

- 1  
2  
3  
4 411 children with respiratory infection in 2011]. *Rev Fac Cien Med Univ Nac*  
5  
6 412 *Cordoba* 2016;73(3):170-75.  
7  
8 413 29. Zeng SZ, Xiao NG, Zhong LL, et al. Clinical features of human  
9  
10 414 metapneumovirus genotypes in children with acute lower respiratory tract  
11  
12 415 infection in Changsha, China. *J Med Virol* 2015;87(11):1839-45. doi:  
13  
14 416 10.1002/jmv.24249  
15  
16 417 30. Zhu RN, Qian Y, Zhao LQ, et al. Characterization of human  
17  
18 418 metapneumovirus from pediatric patients with acute respiratory infections in a  
19  
20 419 4-year period in Beijing, China. *Chin Med J (Engl)* 2011;124(11):1623-8.  
21  
22 420 31. Cai XY, Wang Q, Lin GY, et al. Respiratory virus infections among children in  
23  
24 421 South China. *J Med Virol* 2014;86(7):1249-55. doi: 10.1002/jmv.23931  
25  
26 422 32. Matsuzaki Y, Itagaki T, Abiko C, et al. Clinical impact of human  
27  
28 423 metapneumovirus genotypes and genotype-specific seroprevalence in  
29  
30 424 Yamagata, Japan. *J Med Virol* 2008;80(6):1084-9. doi: 10.1002/jmv.21194  
31  
32 425 33. Barbosa Ramirez J, Pulido Dominguez P, Rey Benito G, et al. Human  
33  
34 426 respiratory syncytial virus and metapneumovirus in patients with acute  
35  
36 427 respiratory infection in Colombia, 2000 - 2011. *Rev Panam Salud Publica*  
37  
38 428 2014;36(2):101-9.  
39  
40 429 34. Zhang C, Du LN, Zhang ZY, et al. Detection and genetic diversity of human  
41  
42 430 metapneumovirus in hospitalized children with acute respiratory infections in  
43  
44 431 Southwest China. *J Clin Microbiol* 2012;50(8):2714-9. doi:  
45  
46 432 10.1128/JCM.00809-12  
47  
48  
49  
50  
51  
52  
53  
54  
55  
56  
57  
58  
59  
60



- 1  
2  
3  
4 433 35. McAdam AJ, Hasenbein ME, Feldman HA, et al. Human metapneumovirus in  
5  
6 434 children tested at a tertiary-care hospital. *J Infect Dis* 2004;190(1):20-6. doi:  
7  
8 435 10.1086/421120  
9  
10  
11 436 36. Boivin G, De Serres G, Cote S, et al. Human metapneumovirus infections in  
12  
13 437 hospitalized children. *Emerg Infect Dis* 2003;9(6):634-40. doi:  
14  
15 438 10.3201/eid0906.030017  
16  
17  
18 439 37. Maggi F, Pifferi M, Vatteroni M, et al. Human metapneumovirus associated  
19  
20 440 with respiratory tract infections in a 3-year study of nasal swabs from infants in  
21  
22 441 Italy. *J Clin Microbiol* 2003;41(7):2987-91.  
23  
24  
25 442 38. van den Hoogen BG, van Doornum GJ, Fockens JC, et al. Prevalence and  
26  
27 443 clinical symptoms of human metapneumovirus infection in hospitalized  
28  
29 444 patients. *J Infect Dis* 2003;188(10):1571-7. doi: 10.1086/379200  
30  
31  
32  
33 445 39. Peiris JS, Tang WH, Chan KH, et al. Children with respiratory disease  
34  
35 446 associated with metapneumovirus in Hong Kong. *Emerg Infect Dis*  
36  
37 447 2003;9(6):628-33. doi: 10.3201/eid0906.030009  
38  
39  
40 448 40. Greensill J, McNamara PS, Dove W, et al. Human metapneumovirus in  
41  
42 449 severe respiratory syncytial virus bronchiolitis. *Emerg Infect Dis*  
43  
44 450 2003;9(3):372-5. doi: 10.3201/eid0903.020289  
45  
46  
47 451 41. Lin PY, Lin TY, Huang YC, et al. Human metapneumovirus and  
48  
49 452 community-acquired pneumonia in children. *Chang Gung Med J*  
50  
51 453 2005;28(10):683-8.  
52  
53  
54  
55 454 42. Ghattas C, Mossad SB. Fatal human metapneumovirus and influenza B virus  
56  
57  
58  
59  
60

- 1  
2  
3  
4 455 coinfection in an allogeneic hematopoietic stem cell transplant recipient.  
5  
6 456 *Transpl Infect Dis* 2012;14(5):E41-3.DOI: 10.1111/j.1399-3062.2012.00766.x.  
7  
8 457 doi: 10.1111/j.1399-3062.2012.00766.x  
9  
10  
11 458 43. Fathima S, Lee BE, May-Hadford J, et al. Use of an innovative web-based  
12  
13 459 laboratory surveillance platform to analyze mixed infections between human  
14  
15 460 metapneumovirus (hMPV) and other respiratory viruses circulating in Alberta  
16  
17 461 (AB), Canada (2009-2012). *Viruses* 2012;4(11):2754-65. doi:  
18  
19 462 10.3390/v4112754  
20  
21  
22  
23 463 44. Kaida A, Kubo H, Goto K, et al. Co-infection of human metapneumovirus with  
24  
25 464 adenovirus or respiratory syncytial virus among children in Japan. *Microbiol*  
26  
27 465 *Immunol* 2007;51(7):679-83.  
28  
29  
30 466 45. Pilger DA, Cantarelli VV, Amantea SL, et al. Detection of human bocavirus  
31  
32 467 and human metapneumovirus by real-time PCR from patients with respiratory  
33  
34 468 symptoms in Southern Brazil. *Mem Inst Oswaldo Cruz* 2011;106(1):56-60.  
35  
36  
37  
38 469 46. Esposito S, Daleno C, Prunotto G, et al. Impact of viral infections in children  
39  
40 470 with community-acquired pneumonia: results of a study of 17 respiratory  
41  
42 471 viruses. *Influenza Other Respir Viruses* 2013;7(1):18-26. doi:  
43  
44 472 10.1111/j.1750-2659.2012.00340.x  
45  
46  
47 473 47. Kahn JS. Newly discovered respiratory viruses: significance and implications.  
48  
49 474 *Curr Opin Pharmacol* 2007;7(5):478-83. doi: 10.1016/j.coph.2007.07.004  
50  
51  
52 475 48. Wolf DG, Greenberg D, Kalkstein D, et al. Comparison of human  
53  
54 476 metapneumovirus, respiratory syncytial virus and influenza A virus lower  
55  
56  
57  
58  
59  
60

- 1  
2  
3  
4 477 respiratory tract infections in hospitalized young children. *Pediatr Infect Dis J*  
5  
6 478 2006;25(4):320-4. doi: 10.1097/01.inf.0000207395.80657.cf  
7  
8 479 49. Wilkesmann A, Schildgen O, Eis-Hubinger AM, et al. Human  
9  
10 480 metapneumovirus infections cause similar symptoms and clinical severity as  
11  
12 481 respiratory syncytial virus infections. *Eur J Pediatr* 2006;165(7):467-75. doi:  
13  
14 482 10.1007/s00431-006-0105-4  
15  
16 483 50. Adams O, Weis J, Jasinska K, et al. Comparison of human  
17  
18 484 metapneumovirus, respiratory syncytial virus and Rhinovirus respiratory tract  
19  
20 485 infections in young children admitted to hospital. *J Med Virol*  
21  
22 486 2015;87(2):275-80. doi: 10.1002/jmv.24025  
23  
24 487 51. Moe N, Krokstad S, Stenseng IH, et al. Comparing Human Metapneumovirus  
25  
26 488 and Respiratory Syncytial Virus: Viral Co-Detections, Genotypes and Risk  
27  
28 489 Factors for Severe Disease. *PLoS One* 2017;12(1):e0170200.DOI:  
29  
30 490 10.1371/journal.pone.00. doi: 10.1371/journal.pone.0170200  
31  
32 491 52. Yan XL, Li YN, Tang YJ, et al. Clinical characteristics and viral load of  
33  
34 492 respiratory syncytial virus and human metapneumovirus in children hospitalized  
35  
36 493 for acute lower respiratory tract infection. *J Med Virol* 2017;89(4):589-97. doi:  
37  
38 494 10.1002/jmv.24687  
39  
40 495 53. Caracciolo S, Minini C, Colombrita D, et al. Human metapneumovirus  
41  
42 496 infection in young children hospitalized with acute respiratory tract disease:  
43  
44 497 virologic and clinical features. *Pediatr Infect Dis J* 2008;27(5):406-12. doi:  
45  
46 498 10.1097/INF.0b013e318162a164  
47  
48  
49  
50  
51  
52  
53  
54  
55  
56  
57  
58  
59  
60

- 1  
2  
3  
4 499 54. Williams JV, Harris PA, Tollefson SJ, et al. Human metapneumovirus and  
5  
6 500 lower respiratory tract disease in otherwise healthy infants and children. *N*  
7  
8 501 *Engl J Med* 2004;350(5):443-50. doi: 10.1056/NEJMoa025472  
9  
10  
11 502 55. Schuster JE, Khuri-Bulos N, Faouri S, et al. Human Metapneumovirus  
12  
13 503 Infection in Jordanian Children: Epidemiology and Risk Factors for Severe  
14  
15 504 Disease. *Pediatr Infect Dis J* 2015;34(12):1335-41. doi:  
16  
17 505 10.1097/INF.0000000000000892  
18  
19  
20 506 56. Semple MG, Cowell A, Dove W, et al. Dual infection of infants by human  
21  
22 507 metapneumovirus and human respiratory syncytial virus is strongly associated  
23  
24 508 with severe bronchiolitis. *J Infect Dis* 2005;191(3):382-6. doi: 10.1086/426457  
25  
26  
27  
28 509

1  
2  
3  
4 510 **Figure legends**

5  
6 511

7  
8 512 **Figure 1** Age distributions of patients with HMPV.

9  
10  
11 513 <sup>a</sup>Date were presented as HMPV positive rate (number of HMPV-positive  
12  
13 514 patients/number of patients in each age group); m: month(s); y: year(s).

14  
15  
16 515

17  
18 516 **Figure 2** Seasonal distribution of HMPV infection in pediatric patients hospitalized with  
19  
20 517 acute respiratory infection from July 2013 to June 2016 in Guangzhou.

518 **Table 1. Distribution of co-pathogens in 19 HMPV-positive patients**

| Co-pathogens <sup>a</sup> | Patient No. |
|---------------------------|-------------|
| RSV/HMPV                  | 4           |
| HCoV-OC43/HMPV            | 3           |
| ADV/HMPV                  | 2           |
| HRV/HMPV                  | 2           |
| MP/HMPV                   | 1           |
| PIV2/HMPV                 | 1           |
| PIV3/HMPV                 | 1           |
| RSV/MP/HMPV               | 1           |
| RSV/InfA/HMPV             | 1           |
| RSV/HBoV/HMPV             | 1           |
| MP/HBoV/HMPV              | 1           |
| InfA/HBoV/HMPV            | 1           |

519 <sup>a</sup>HMPV-positive patients were tested for 17 common respiratory pathogens.

520 RSV: respiratory syncytial virus; PIV: parainfluenza virus; InfA: influenza A virus; ADV:

521 adenovirus; HCoV: human coronaviruses; HRV: human rhinovirus; HBoV: human

522 bocavirus; MP: *Mycoplasma pneumoniae*.

523 Influenza B viruses, parainfluenza virus types 1 and 4, enterovirus, human

524 coronaviruses-HKU1, human coronaviruses-229E, human coronaviruses-NL63, and

525 *Chlamydomphila pneumoniae* were not detected.

526

527

**Table 2. Clinical presentations of HMPV-positive patients**

| Diagnosis/Symptom                               | Total HMPV<br>(n=101) | Patients with only HMPV and HMPV<br>plus other pathogen(s) detected. |                         |                         |
|-------------------------------------------------|-----------------------|----------------------------------------------------------------------|-------------------------|-------------------------|
|                                                 |                       | Single HMPV<br>(n = 83)                                              | Co-pathogens<br>(n= 18) | p<br>value <sup>b</sup> |
| <b>Upper respiratory tract infection</b>        |                       |                                                                      |                         |                         |
| Nasal obstruction                               | 40(39.6)              | 34(41.0)                                                             | 6(33.3)                 | 0.605                   |
| Coryza                                          | 51(50.5)              | 44(53.0)                                                             | 7(38.9)                 | 0.309                   |
| Sneeze                                          | 1(1.0)                | 1(1.2)                                                               | 0(0)                    | — <sup>c</sup>          |
| Cough                                           | 101(100)              | 83(100)                                                              | 18(100)                 | — <sup>d</sup>          |
| Expectoration                                   | 78(77.2)              | 66(79.5)                                                             | 12(66.7)                | 0.351                   |
| Hoarseness                                      | 1(1.0)                | 1(1.2)                                                               | 0(0)                    | — <sup>c</sup>          |
| <b>Lower respiratory tract infection</b>        |                       |                                                                      |                         |                         |
| Abnormal pulmonary<br>breath sound <sup>a</sup> | 92(91.1)              | 75(90.4)                                                             | 17(94.4)                | 0.582                   |
| Increasing lung markings                        | 6(6.0)                | 4(4.8)                                                               | 2(11.1)                 | 0.29                    |
| wheezing                                        | 47(46.5)              | 40(48.2)                                                             | 7(38.9)                 | 0.473                   |
| anhelation                                      | 24(23.8)              | 21(25.3)                                                             | 3(16.7)                 | 0.551                   |
| Bronchiolitis                                   | 8(7.9)                | 7(8.4)                                                               | 1(5.6)                  | 0.682                   |
| Pneumonia                                       | 11(10.9)              | 10(12.1)                                                             | 1(5.6)                  | 0.684                   |
| bronchopneumonia                                | 56(55.4)              | 46(55.4)                                                             | 10(55.6)                | 0.992                   |
| <b>Systemic influenza-like symptoms</b>         |                       |                                                                      |                         |                         |
| Fever (≥38°C)                                   | 89(88.1)              | 76(91.6)                                                             | 13(72.2)                | <b>0.037</b>            |
| Chill                                           | 7(6.9)                | 6(7.2)                                                               | 1(5.6)                  | 0.8                     |
| Debilitation                                    | 11(10.9)              | 11(13.3)                                                             | 0(0)                    | — <sup>c</sup>          |
| <b>Gastrointestinal illness</b>                 |                       |                                                                      |                         |                         |
| Vomiting                                        | 21(20.8)              | 16(19.3)                                                             | 5(27.8)                 | 0.522                   |
| Poor appetite                                   | 19(18.8)              | 17(20.5)                                                             | 2(11.1)                 | 0.513                   |
| Diarrhea                                        | 7(7.0)                | 3(3.6)                                                               | 4(22.2)                 | <b>0.018</b>            |

528 Data are presented as No. (%) of each group.

529 Percentages sum to >100% because some patients had >1 clinical presentations.

530 <sup>a</sup>Including phlegmatic, wheezing, bubbling, and moist rales.

531 <sup>b</sup>Two-tailed  $\chi^2$  test comparing the distribution of each illness or diagnosis between  
532 patients with only HMPV and HMPV plus other pathogen(s) detected.

533 <sup>c</sup>Not tested because the number of positive samples obtained was too small.

534 <sup>d</sup>Not tested because the prevalence was 100%.



Figure 1 Age distributions of patients with HMPV.

<sup>a</sup>Data were presented as HMPV positive rate (number of HMPV-positive patients/number of patients in each age group); m: month(s); y: year(s).

42x35mm (300 x 300 DPI)



1  
2  
3  
4  
5  
6  
7  
8  
9  
10  
11  
12  
13  
14  
15  
16  
17  
18  
19  
20  
21  
22  
23  
24  
25  
26  
27  
28  
29  
30  
31  
32  
33  
34  
35  
36  
37  
38  
39  
40  
41  
42  
43  
44  
45  
46  
47  
48  
49  
50  
51  
52  
53  
54  
55  
56  
57  
58  
59  
60

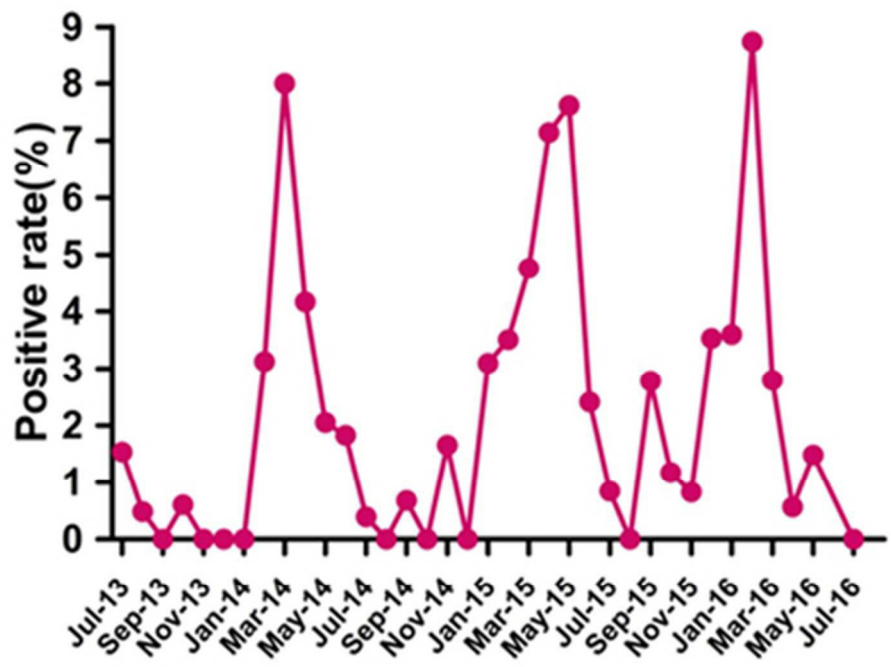

Figure 2 Seasonal distribution of HMPV infection in pediatric patients hospitalized with acute respiratory infection from July 2013 to June 2016 in Guangzhou.

39x31mm (300 x 300 DPI)

**STROBE 2007 (v4) Statement—Checklist of items that should be included in reports of *cross-sectional studies***

| Section/Topic                | Item # | Recommendation                                                                                                                                                                       | Reported on page # |
|------------------------------|--------|--------------------------------------------------------------------------------------------------------------------------------------------------------------------------------------|--------------------|
| <b>Title and abstract</b>    | 1      | (a) Indicate the study's design with a commonly used term in the title or the abstract                                                                                               | 1                  |
|                              |        | (b) Provide in the abstract an informative and balanced summary of what was done and what was found                                                                                  | 2-3                |
| <b>Introduction</b>          |        |                                                                                                                                                                                      |                    |
| Background/rationale         | 2      | Explain the scientific background and rationale for the investigation being reported                                                                                                 | 4                  |
| Objectives                   | 3      | State specific objectives, including any prespecified hypotheses                                                                                                                     | 4-5                |
| <b>Methods</b>               |        |                                                                                                                                                                                      |                    |
| Study design                 | 4      | Present key elements of study design early in the paper                                                                                                                              | 6                  |
| Setting                      | 5      | Describe the setting, locations, and relevant dates, including periods of recruitment, exposure, follow-up, and data collection                                                      | 6                  |
| Participants                 | 6      | (a) Give the eligibility criteria, and the sources and methods of selection of participants                                                                                          | 6                  |
| Variables                    | 7      | Clearly define all outcomes, exposures, predictors, potential confounders, and effect modifiers. Give diagnostic criteria, if applicable                                             | 6-7                |
| Data sources/<br>measurement | 8*     | For each variable of interest, give sources of data and details of methods of assessment (measurement). Describe comparability of assessment methods if there is more than one group | 7                  |
| Bias                         | 9      | Describe any efforts to address potential sources of bias                                                                                                                            | 6                  |
| Study size                   | 10     | Explain how the study size was arrived at                                                                                                                                            | 6                  |
| Quantitative variables       | 11     | Explain how quantitative variables were handled in the analyses. If applicable, describe which groupings were chosen and why                                                         | 7-8                |
| Statistical methods          | 12     | (a) Describe all statistical methods, including those used to control for confounding                                                                                                | 8                  |
|                              |        | (b) Describe any methods used to examine subgroups and interactions                                                                                                                  | 8                  |
|                              |        | (c) Explain how missing data were addressed                                                                                                                                          | 7                  |
|                              |        | (d) If applicable, describe analytical methods taking account of sampling strategy                                                                                                   | 8                  |
|                              |        | (e) Describe any sensitivity analyses                                                                                                                                                |                    |
| <b>Results</b>               |        |                                                                                                                                                                                      |                    |

|                          |     |                                                                                                                                                                                                              |       |
|--------------------------|-----|--------------------------------------------------------------------------------------------------------------------------------------------------------------------------------------------------------------|-------|
| Participants             | 13* | (a) Report numbers of individuals at each stage of study—eg numbers potentially eligible, examined for eligibility, confirmed eligible, included in the study, completing follow-up, and analysed            | 9     |
|                          |     | (b) Give reasons for non-participation at each stage                                                                                                                                                         | 10    |
|                          |     | (c) Consider use of a flow diagram                                                                                                                                                                           |       |
| Descriptive data         | 14* | (a) Give characteristics of study participants (eg demographic, clinical, social) and information on exposures and potential confounders                                                                     | 9-11  |
|                          |     | (b) Indicate number of participants with missing data for each variable of interest                                                                                                                          | 9     |
| Outcome data             | 15* | Report numbers of outcome events or summary measures                                                                                                                                                         | 9-11  |
| Main results             | 16  | (a) Give unadjusted estimates and, if applicable, confounder-adjusted estimates and their precision (eg, 95% confidence interval). Make clear which confounders were adjusted for and why they were included | 9-11  |
|                          |     | (b) Report category boundaries when continuous variables were categorized                                                                                                                                    | 9-10  |
|                          |     | (c) If relevant, consider translating estimates of relative risk into absolute risk for a meaningful time period                                                                                             |       |
| Other analyses           | 17  | Report other analyses done—eg analyses of subgroups and interactions, and sensitivity analyses                                                                                                               |       |
| <b>Discussion</b>        |     |                                                                                                                                                                                                              |       |
| Key results              | 18  | Summarise key results with reference to study objectives                                                                                                                                                     | 12-15 |
| Limitations              | 19  | Discuss limitations of the study, taking into account sources of potential bias or imprecision. Discuss both direction and magnitude of any potential bias                                                   | 15-16 |
| Interpretation           | 20  | Give a cautious overall interpretation of results considering objectives, limitations, multiplicity of analyses, results from similar studies, and other relevant evidence                                   | 12-16 |
| Generalisability         | 21  | Discuss the generalisability (external validity) of the study results                                                                                                                                        | 12-16 |
| <b>Other information</b> |     |                                                                                                                                                                                                              |       |
| Funding                  | 22  | Give the source of funding and the role of the funders for the present study and, if applicable, for the original study on which the present article is based                                                | 18    |

\*Give information separately for cases and controls in case-control studies and, if applicable, for exposed and unexposed groups in cohort and cross-sectional studies.

**Note:** An Explanation and Elaboration article discusses each checklist item and gives methodological background and published examples of transparent reporting. The STROBE checklist is best used in conjunction with this article (freely available on the Web sites of PLoS Medicine at <http://www.plosmedicine.org/>, Annals of Internal Medicine at <http://www.annals.org/>, and Epidemiology at <http://www.epidem.com/>). Information on the STROBE Initiative is available at [www.strobe-statement.org](http://www.strobe-statement.org).

# BMJ Open

## Epidemiology and clinical features of human metapneumovirus in hospitalized pediatric patients with acute respiratory illness: a cross-sectional study in southern China, from 2013 to 2016

|                                 |                                                                                                                                                                                                                                                                                                                                                                                                                                                                                                                                                                                                                                                                                                                                                                                                                                                                                                                                                                                                                                                                                                                                                                                                                                                                                                                                                                                                                                                                                        |
|---------------------------------|----------------------------------------------------------------------------------------------------------------------------------------------------------------------------------------------------------------------------------------------------------------------------------------------------------------------------------------------------------------------------------------------------------------------------------------------------------------------------------------------------------------------------------------------------------------------------------------------------------------------------------------------------------------------------------------------------------------------------------------------------------------------------------------------------------------------------------------------------------------------------------------------------------------------------------------------------------------------------------------------------------------------------------------------------------------------------------------------------------------------------------------------------------------------------------------------------------------------------------------------------------------------------------------------------------------------------------------------------------------------------------------------------------------------------------------------------------------------------------------|
| Journal:                        | <i>BMJ Open</i>                                                                                                                                                                                                                                                                                                                                                                                                                                                                                                                                                                                                                                                                                                                                                                                                                                                                                                                                                                                                                                                                                                                                                                                                                                                                                                                                                                                                                                                                        |
| Manuscript ID                   | bmjopen-2017-019308.R3                                                                                                                                                                                                                                                                                                                                                                                                                                                                                                                                                                                                                                                                                                                                                                                                                                                                                                                                                                                                                                                                                                                                                                                                                                                                                                                                                                                                                                                                 |
| Article Type:                   | Research                                                                                                                                                                                                                                                                                                                                                                                                                                                                                                                                                                                                                                                                                                                                                                                                                                                                                                                                                                                                                                                                                                                                                                                                                                                                                                                                                                                                                                                                               |
| Date Submitted by the Author:   | 27-Dec-2017                                                                                                                                                                                                                                                                                                                                                                                                                                                                                                                                                                                                                                                                                                                                                                                                                                                                                                                                                                                                                                                                                                                                                                                                                                                                                                                                                                                                                                                                            |
| Complete List of Authors:       | Zhang, Ling; State Key Laboratory of Respiratory Diseases, The First Affiliated Hospital of Guangzhou Medical University, Guangzhou Medical University<br>Liu, Wenkuan; State Key Laboratory of Respiratory Diseases, The First Affiliated Hospital of Guangzhou Medical University, Guangzhou Medical University<br>Liu, Donglan; State Key Laboratory of Respiratory Diseases, The First Affiliated Hospital of Guangzhou Medical University, Guangzhou Medical University<br>Chen, Dehui; Department of Pediatrics, The First Affiliated Hospital of Guangzhou Medical University, Guangzhou Medical University<br>Tan, Weiping ; Sun Yat-Sen Memorial Hospital, Sun Yat-Sen University<br>Qiu, Shuyan; State Key Laboratory of Respiratory Diseases, The First Affiliated Hospital of Guangzhou Medical University, Guangzhou Medical University<br>Xu, Duo; State Key Laboratory of Respiratory Diseases, The First Affiliated Hospital of Guangzhou Medical University, Guangzhou Medical University<br>Li, Xiao; State Key Laboratory of Respiratory Diseases, The First Affiliated Hospital of Guangzhou Medical University, Guangzhou Medical University<br>Liu, Tiantian; State Key Laboratory of Respiratory Diseases, The First Affiliated Hospital of Guangzhou Medical University, Guangzhou Medical University<br>Zhou, Rong; State Key Laboratory of Respiratory Diseases, The First Affiliated Hospital of Guangzhou Medical University, Guangzhou Medical University |
| <b>Primary Subject Heading</b>: | Infectious diseases                                                                                                                                                                                                                                                                                                                                                                                                                                                                                                                                                                                                                                                                                                                                                                                                                                                                                                                                                                                                                                                                                                                                                                                                                                                                                                                                                                                                                                                                    |
| Secondary Subject Heading:      | Epidemiology, Paediatrics, Infectious diseases                                                                                                                                                                                                                                                                                                                                                                                                                                                                                                                                                                                                                                                                                                                                                                                                                                                                                                                                                                                                                                                                                                                                                                                                                                                                                                                                                                                                                                         |
| Keywords:                       | Respiratory infections < THORACIC MEDICINE, Epidemiology < INFECTIOUS DISEASES, VIROLOGY, Diagnostic microbiology < INFECTIOUS DISEASES                                                                                                                                                                                                                                                                                                                                                                                                                                                                                                                                                                                                                                                                                                                                                                                                                                                                                                                                                                                                                                                                                                                                                                                                                                                                                                                                                |
|                                 |                                                                                                                                                                                                                                                                                                                                                                                                                                                                                                                                                                                                                                                                                                                                                                                                                                                                                                                                                                                                                                                                                                                                                                                                                                                                                                                                                                                                                                                                                        |

1  
2  
3  
4  
5  
6  
7  
8  
9  
10  
11  
12  
13  
14  
15  
16  
17  
18  
19  
20  
21  
22  
23  
24  
25  
26  
27  
28  
29  
30  
31  
32  
33  
34  
35  
36  
37  
38  
39  
40  
41  
42  
43  
44  
45  
46  
47  
48  
49  
50  
51  
52  
53  
54  
55  
56  
57  
58  
59  
60

SCHOLARONE™  
Manuscripts

For peer review only

1  
2  
3  
4 1 **Epidemiology and clinical features of human metapneumovirus in hospitalized**  
5  
6 2 **pediatric patients with acute respiratory illness: a cross-sectional study in**  
7  
8 3 **southern China, from 2013 to 2016**  
9  
10  
11  
12 4

13  
14 5 Ling Zhang<sup>1†</sup>, Wenkuan Liu<sup>1†</sup>, Donglan Liu<sup>1†</sup>, Dehui Chen<sup>2</sup>, Weiping Tan<sup>3</sup>, Shuyan  
15  
16 6 Qiu<sup>1</sup>, Duo Xu<sup>1</sup>, Xiao Li<sup>1</sup>, Tiantian Liu<sup>1</sup>, Rong Zhou<sup>1\*</sup>  
17  
18  
19 7

20  
21 8 <sup>1</sup>State Key Laboratory of Respiratory Diseases, The First Affiliated Hospital of  
22  
23 9 Guangzhou Medical University, Guangzhou Medical University, Guangzhou,  
24  
25 10 People's Republic of China.  
26  
27

28  
29 11 <sup>2</sup>Department of Pediatrics, The First Affiliated Hospital of Guangzhou Medical  
30  
31 12 University, Guangzhou Medical University, Guangzhou, People's Republic of China.  
32  
33

34 13 <sup>3</sup>Sun Yat-Sen Memorial Hospital, Sun Yat-Sen University, Guangzhou, People's  
35  
36 14 Republic of China.  
37  
38

39 15  
40  
41 16 <sup>†</sup>Ling Zhang, Wenkuan Liu and Donglan Liu contributed equally to this work.  
42  
43  
44 17

45  
46 18 \*Correspondence to Rong Zhou, e-mail: [zhourong@gird.cn](mailto:zhourong@gird.cn)  
47  
48  
49  
50  
51  
52  
53  
54  
55  
56  
57  
58  
59  
60

1  
2  
3  
4 19 **Abstract**

5  
6 20 **Objectives:** Human metapneumovirus (HMPV) is one of the most important  
7  
8 21 respiratory viral pathogens affecting infants and children worldwide. Our study  
9  
10 22 describes the epidemiological and clinical characteristics of HMPV present in patients  
11  
12 23 hospitalized with acute respiratory illness (ARI) in Guangzhou, southern China.

13  
14  
15  
16 24 **Study design:** A cross-sectional study.

17  
18 25 **Setting:** Two tertiary hospitals in Guangzhou.

19  
20 26 **Participants and methods:** Throat swabs were collected over a 3-year period from  
21  
22 27 5133 pediatric patients ( $\leq 14$  years) hospitalized with ARI. HMPV-positive patients'  
23  
24 28 clinical presentations (101/103) were recorded for further analysis.

25  
26  
27  
28 29 **Results:** Of the 5133 patients included in the study, 103 (2.0%) were positive for  
29  
30 30 HMPV. HMPV was more prevalent in children  $\leq 5$  years (2.2%, 98/4399) compared  
31  
32 31 with older children ( $>5$ –14 years) (0.7%, 5/734) ( $p=0.004$ ). Two seasonal HMPV  
33  
34 32 peaks were observed each year and mainly occurred in spring and early summer.  
35  
36 33 Overall, 18.4% (19/103) of HMPV-positive patients were co-detected with other  
37  
38 34 pathogens, most frequently respiratory syncytial virus (36.8%, 7/19). HMPV-positive  
39  
40 35 patients presented with a wide spectrum of clinical features, including cough (100.0%,  
41  
42 36 101/101), abnormal pulmonary breath sound (91.1%, 92/101), fever (88.1%, 89/101),  
43  
44 37 expectoration (77.2%, 78/101), coryza (50.5%, 51/101) and wheezing (46.5%,  
45  
46 38 47/101). The main diagnosis of HMPV-positive patients was bronchopneumonia  
47  
48 39 (66.7%, 56/84). Fever ( $\geq 38^{\circ}\text{C}$ ) (91.6%, 76/83) was detected more often in patients  
49  
50 40 with only HMPV detected than in patients with HMPV plus other pathogen(s) detected  
51  
52  
53  
54  
55  
56  
57  
58  
59  
60

1  
2  
3  
4 41 (72.2%, 13/18) ( $p=0.037$ ), whereas diarrhea was more common in patients with  
5  
6 42 HMPV plus other pathogen(s) detected (22.2%, 4/18), compared with patients with  
7  
8 43 HMPV only (3.6%, 3/83) ( $p=0.018$ ).

9  
10  
11 44 **Conclusions:** HMPV is an important respiratory pathogen in children with ARI in  
12  
13 45 Guangzhou, particularly in children  $\leq 5$  years old. HMPV has a seasonal variation.  
14  
15  
16 46 Bronchopneumonia is a major diagnosis in HMPV-positive patients.

17  
18  
19  
20  
21 48 **Strengths and limitations of this study**

- 22  
23 49 ● 5133 patients hospitalized with acute respiratory illness at two large municipal  
24  
25 50 tertiary hospitals (hospital beds  $> 1000$ ) were enrolled on the study over 3 years.  
26  
27  
28 51 ● Patients aged from 1 day to 14 years old were tested for HMPV using Taqman  
29  
30 52 real-time PCR.  
31  
32  
33 53 ● Clinical characteristics of patients with HMPV-positive were recorded.  
34  
35 54 ● There was incomplete HMPV co-pathogen detection, because bacterial  
36  
37 55 pathogens were not detected for HMPV-positive patients.  
38  
39  
40 56 ● The clinical characteristics of HMPV-negative patients and outcome data  
41  
42 57 (discharge/death) for the HMPV-positive patients were not collected for further  
43  
44 58 analysis, limiting our understanding of this pathogen.

45  
46  
47  
48  
49  
50 60 **Introduction**

51  
52 61 Human metapneumovirus (HMPV) is a nonsegmented, negative-sense  
53  
54 62 single-stranded RNA virus, which belongs to the *Paramyxoviridae* family.<sup>1</sup> HMPV was



1  
2  
3  
4 63 first discovered in 2001 in the Netherlands, after being isolated from a pediatric patient  
5  
6 64 with acute respiratory illness (ARI).<sup>2</sup> Since then, HMPV has been associated with  
7  
8 65 acute respiratory disease in individuals of all ages worldwide. Children, elderly and  
9  
10 66 immunocompromised adults are most at risk of contracting the virus.<sup>3-5</sup> Children  
11  
12 67 younger than 5 years of age seem to be particularly susceptible to HMPV. Previous  
13  
14 68 studies,<sup>6-12</sup> which were mainly conducted in developed countries, have revealed that  
15  
16 69 approximately 2.5%–11.3% of respiratory samples were positive for HMPV in children  
17  
18 70 ≤5 years, and 90% of individuals were seropositive for HMPV by 5 years of age.<sup>13</sup>  
19  
20  
21  
22

23 71 HMPV causes a variety of clinical symptoms ranging from a mild upper  
24  
25 72 respiratory tract infection (URTI) to life-threatening lower respiratory tract infection  
26  
27 73 (LRTI).<sup>3 14-16</sup> However, to date, there is no effective vaccine or specific medication  
28  
29 74 either for prevention or treatment of HMPV infection. Consequently, it is imperative to  
30  
31 75 conduct more studies, especially in low and middle-income countries, to understand  
32  
33 76 this pathogen in different areas and populations.  
34  
35  
36  
37

38 77 In this study, we investigated the epidemiological and clinical features of HMPV  
39  
40 78 in pediatric patients, from July 2013 to June 2016. The findings of this study will help  
41  
42 79 understand the distribution of HMPV in a subtropical region. Our results also provide a  
43  
44 80 valuable insight into the clinical features of HMPV, which will improve early clinical  
45  
46 81 diagnosis.  
47  
48  
49  
50  
51  
52  
53  
54  
55  
56  
57  
58  
59  
60

## 82 **Methods**

### 83 **Study design and respiratory sample collection**

84 We conducted a cross-sectional study at two tertiary hospitals in Guangzhou,  
85 southern China. Throat swab samples (n=5133) from pediatric patients ( $\leq 14$  years)  
86 hospitalized with ARI, were collected at two hospitals between July 2013 and June  
87 2016. ARI was defined as an illness that presented with at least two of the following  
88 clinical presentations: cough, nasal obstruction, coryza, sneeze, dyspnoea during the  
89 previous week. Patients, who were diagnosed with pneumonia by chest radiography  
90 during the previous week, were also included in the study, even if they did not show  
91 the clinical features described above. Some patients, who had been cured and  
92 discharged some time ago and readmitted because of new episodes of ARI, if met the  
93 recruitment criteria, were included in the study as new cases, otherwise excluded.  
94 Chest radiography was performed based on the clinical situation of the patients. The  
95 samples were collected according to established clinical protocols.<sup>17</sup> The samples  
96 were refrigerated at 2–8°C in viral transport medium, transported on ice to the State  
97 Key Laboratory of Respiratory Diseases, and analyzed immediately or stored at -80°C  
98 before analysis as previously described.<sup>18</sup>

99 The patients' clinical presentations or diagnoses were recorded from patients'  
100 medical records by attending physicians, using designed presentation cards and were  
101 categorized retrospectively into the following four groups: URTI, LRTI, systemic  
102 influenza-like symptoms, and gastrointestinal illness. Patients with nasal obstruction,  
103 coryza, sneezing, coughing, expectoration, or hoarseness were categorized as

1  
2  
3 104 having URTI. Patients with bronchiolitis, pneumonia, bronchopneumonia, increased  
4  
5  
6 105 lung markings, dyspnea, or an abnormal pulmonary breath sound were categorized  
7  
8  
9 106 as having LRTI. Patients with a high fever ( $\geq 38^{\circ}\text{C}$ ), chills, or debilitation were  
10  
11 107 categorized as having systemic influenza-like symptoms. Patients with vomiting, poor  
12  
13 108 appetite, or diarrhea were categorized as having gastrointestinal illness. Some  
14  
15  
16 109 patients were assigned to several clinical presentation groups. Patients with  
17  
18 110 incomplete clinical data were excluded from this analysis. Increased lung markings,  
19  
20  
21 111 bronchopneumonia, pneumonia, and bronchiolitis were diagnosed by chest  
22  
23 112 radiography. Abnormal pulmonary breath sounds included phlegmatic, wheezy,  
24  
25  
26 113 bubbling, and moist rales. Other clinical symptoms were identified by a general  
27  
28 114 medical examination and clinical descriptions, as previously reported.<sup>19</sup>

29  
30  
31 115

### 32 116 **Real-time PCR for HMPV detection**

33  
34  
35 117 RNA was extracted from the throat swab samples with the QIAamp Viral RNA  
36  
37  
38 118 Mini Kit (Qiagen, Shanghai, China), according to the manufacturer's protocols. HMPV  
39  
40 119 was identified by using TaqMan Real-time PCR assays, as previously reported,<sup>18</sup>  
41  
42  
43 120 using kits from Guangzhou HuYanSuo Medical Technology Co., Ltd according to the  
44  
45  
46 121 manufacturer's protocols. In brief, 50  $\mu\text{l}$  RNA were extracted from a 200  $\mu\text{l}$  sample,  
47  
48 122 and real-time PCR was conducted using 25  $\mu\text{l}$  reaction mix, containing M-MLV, Taq  
49  
50  
51 123 polymerase and 5  $\mu\text{l}$  extracted RNA. Cycling conditions included an initial reverse  
52  
53 124 transcription at  $55^{\circ}\text{C}$  for 10 min, incubation at  $94^{\circ}\text{C}$  for 2 min, followed by 40 cycles of  
54  
55 125  $94^{\circ}\text{C}$  for 10 sec and  $55^{\circ}\text{C}$  for 35 sec (ABI-7500 real-time PCR instrument, Life

1  
2  
3  
4 126 Technologies, Singapore).  
5

6 127  
7

8 128 **Detection of common respiratory pathogens in HMPV-positive patients**  
9

10 129 HMPV-positive samples were tested simultaneously using TaqMan Real-time  
11  
12 130 PCR assays for the following 17 respiratory pathogens: respiratory syncytial virus  
13  
14 131 (RSV); parainfluenza virus types 1–4 (PIV1–4); influenza A and B viruses (InfA, InfB);  
15  
16 132 adenovirus (ADV); enterovirus (EV); human coronaviruses (HCoV-229E, HCoV-OC43,  
17  
18 133 HCoV-NL63, HCoV-HKU1); human rhinovirus (HRV); human bocavirus (HBoV);  
19  
20 134 *Mycoplasma pneumoniae* (MP); and *Chlamydomphila pneumoniae* (CP); The testing  
21  
22 135 procedure was conducted using kits from Guangzhou HuYanSuo Medical Technology  
23  
24 136 Co., Ltd as previously described.<sup>18</sup>  
25  
26  
27  
28  
29

30 137  
31

32 138 **Statistical analysis**  
33

34  
35 139 All statistical analyses were performed with SPSS statistical software (version  
36  
37 140 19.0; SPSS Inc., Chicago, IL, USA). To compare categorical data,  $\chi^2$  and Fisher's  
38  
39 141 exact tests were used, as appropriate. All tests were two-tailed, and  $p < 0.05$  was  
40  
41 142 considered statistically significant.  
42  
43  
44  
45  
46  
47  
48  
49  
50  
51  
52  
53  
54  
55  
56  
57  
58  
59  
60

## 143 **Results**

### 144 **Detection of HMPV from patients with ARI**

145 In total, 5133 pediatric patients, ranging from 1 day to 14 years old were  
146 enrolled in this study. The male-to-female ratio was 1.75 (3269:1864) and the median  
147 age was 33 months (interquartile range, 9–48 months). Of the 5133 patients, 103  
148 (2.0%) were positive for HMPV. The male-to-female ratio was 1.86:1 (67:36) in  
149 HMPV-positive patients and 1.75:1 (3202:1828) in HMPV-negative patients ( $p=0.771$ ).  
150 The median age in months of HMPV-positive patients was 23.5 months (interquartile  
151 range, 10–36 months).

### 153 **Co-detection with common respiratory pathogens in HMPV-positive patients**

154 We also tested HMPV-positive samples for 17 common respiratory pathogens.  
155 Of the 103 HMPV-positive patients, 84 (81.6%) patients had only HMPV detection,  
156 and 19 (18.4%) patients had HMPV plus other pathogen(s) detected. Nine out of 17  
157 respiratory pathogens (52.9%) were detected and the most common co-detection  
158 pathogens were RSV (36.8%, 7/19), HCoV-OC43 (15.8%, 3/19), MP (15.8%, 3/19),  
159 and HBoV (15.8%, 3/19) (**Table 1**). The male-to-female ratio was 2:1 (56:28) in  
160 patients with only HMPV detected and 1.38:1 (11:8) in patients with HMPV plus other  
161 pathogen(s) detected ( $p=0.469$ ).

### 163 **Age distribution of HMPV-positive patients**

164 Overall, there was a significant difference in HMPV prevalence between

165 patients >5–14 years (0.7%, 5/734) and those ≤5 years (2.2%, 98/4399) ( $p=0.004$ ).

166 The patients were divided into six age groups: 0–3 months, >3–6 months, >6–12

167 months, >1–2 years, >2–5 years, and >5–14 years. The distribution of HMPV

168 prevalence between these age groups was significantly different ( $p=0.03$ ), and

169 children >1–2 years had the highest prevalence (2.8%, 21/752) (**Figure 1**).

170

### 171 **Seasonal distribution of HMPV**

172 Over the 3-year study period, the prevalence of HMPV peaked twice every

173 year (**Figure 2**). Large peaks occurred in March 2014 (8%, 16/200), May 2015 (7.6%,

174 8/105) and February 2016 (8.7%, 9/103). Small peaks occurred in November 2014

175 (1.7%, 2/121), September 2015 (2.8%, 2/72) and May 2016 (1.5%, 2/135) (**Figure 2**).

176

### 177 **Clinical presentation of HMPV-positive patients**

178 We analyzed the clinical presentation of 101 of the 103 (98.1%) HMPV-positive

179 patients, the other two patients were excluded from this analysis because of

180 incomplete clinical data. The main clinical features of HMPV-positive patients included

181 cough (100.0%, 101/101), abnormal pulmonary breath sound (91.1%, 92/101), fever

182 (88.1%, 89/101), expectoration (77.2%, 78/101), coryza (50.5%, 51/101) and

183 wheezing (46.5%, 47/101). Of 84 with a chest radiography, 56 (66.7%) were

184 diagnosed with bronchopneumonia, 11 (13.1%) were pneumonia and 8 (9.5%) were

185 bronchiolitis (**Table 2**). We also compared the clinical features of patients with only

186 HMPV detected and those of the patients with HMPV plus other pathogen(s) detected.

1  
2  
3  
4 187 Fever and diarrhea were the two symptoms that were identified as statistically  
5  
6 188 different between these two groups; A fever ( $\geq 38^{\circ}\text{C}$ ) was seen more common in  
7  
8 189 patients with only HMPV detected (91.6%, 76/83) , compared with 72.2% (13/18) in  
9  
10 190 patients with HMPV plus other pathogen(s) detected ( $p=0.037$ ). Conversely, diarrhea  
11  
12 191 appeared more often in patients with HMPV plus other pathogen(s) detected (22.2%,  
13  
14 192 4/18) than in the patients with only HMPV detected (3.6%, 3/83) (**Table 2**).

1  
2  
3  
4  
5  
6  
7  
8  
9  
10  
11  
12  
13  
14  
15  
16  
17  
18  
19  
20  
21  
22  
23  
24  
25  
26  
27  
28  
29  
30  
31  
32  
33  
34  
35  
36  
37  
38  
39  
40  
41  
42  
43  
44  
45  
46  
47  
48  
49  
50  
51  
52  
53  
54  
55  
56  
57  
58  
59  
60

193 **Discussion**

194 Viruses are the most frequent cause of respiratory infections.<sup>20</sup> HMPV has  
195 been recognized as an important cause of ARI since its discovery in 2001. A previous  
196 study reported HMPV was responsible for approximately 5–10% of hospitalizations in  
197 children suffering from ARI,<sup>14</sup> creating a considerable clinical and economic burden  
198 worldwide. HMPV detection rates vary according to geographic location, and the  
199 incidence of HMPV may show seasonal or annual patterns in the same area. In  
200 previous studies,<sup>21–30</sup> HMPV was detected in approximately 1%–17% of ARI cases. In  
201 this 3 year study, 103 of 5133 (2.0%) patients were positive for HMPV, which is similar  
202 to previous reports of HMPV in patients with ARI in southern China<sup>31</sup> and Japan.<sup>32</sup>

203 Children under 5 years of age are most susceptible to HMPV infection, and  
204 those younger than 2 years of age are at the greatest risk of developing serious  
205 conditions.<sup>15</sup> In our study, HMPV-positive cases appeared more frequently in patients  
206 ≤5 year-old (2.2%, 98/4399) than in patients >5 year-old (0.7%, 5/734) ( $p=0.004$ ),  
207 which is consistent with many previous studies.<sup>3 30 33 34</sup> Specifically, HMPV prevalence  
208 was highest in children >1–2 years (2.8%, 21/752). This may be explained by the  
209 immunity against HMPV, which is passed down from mother-to-child, gradually  
210 subsiding over time. Moreover, children were more contact with outside world as they  
211 grew older. Therefore, children of this age need more attention to prevent HMPV  
212 infection. Moreover, our findings suggested no difference in risk between sex, there  
213 was no significant difference in the HMPV prevalence between male and female  
214 patients ( $p=0.771$ ), which is consistent with previous studies.<sup>35 36</sup>



1  
2  
3  
4 215 HMPV has a typical seasonal distribution. HMPV activity is largely affected by  
5  
6 216 different local climate factors. The prevalence of HMPV in temperate climates peaks  
7  
8 217 at the end of winter or in early spring.<sup>37 38</sup> In our study, seasonal peaks of HMPV were  
9  
10 218 detected in February 2016, March 2014 and May 2015. This finding indicates that  
11  
12 219 HMPV circulates primarily during the spring and early summer in Guangzhou, this  
13  
14 220 pattern is similar to previous reports from other subtropical areas.<sup>22 39</sup> Furthermore, we  
15  
16 221 also found small peaks in November 2014, September 2015, and May 2016, the  
17  
18 222 reason for this is unknown. It should be noted that the seasonal distribution of HMPV  
19  
20 223 overlaps with RSV in this geographical area.<sup>19</sup> Knowing the epidemiological  
21  
22 224 characteristics of HMPV will help public health authorities and clinicians to improve  
23  
24 225 strategies for controlling HMPV infection.

25  
26  
27  
28  
29  
30 226 HMPV co-infection with other respiratory pathogens has been reported in  
31  
32 227 many studies, including RSV,<sup>40</sup> InfA,<sup>41</sup> InfB,<sup>42</sup> PIV,<sup>43</sup> ADV,<sup>43 44</sup> HBoV,<sup>45</sup> HCoV,<sup>43 46</sup>  
33  
34 228 HRV,<sup>43</sup> EV,<sup>43</sup> MP,<sup>41</sup> and CP.<sup>41</sup> In our study, most HMPV-positive patients only had  
35  
36 229 HMPV (81.6%, 84/103), and there was no significant difference in the HMPV  
37  
38 230 prevalence according to sex between the patients with only HMPV detected and the  
39  
40 231 patients with HMPV plus other pathogen(s) detected ( $p=0.469$ ). The co-detection rate  
41  
42 232 was 18.4% (19/103), and RSV (36.8%, 7/19) was the most frequently co-detected  
43  
44 233 pathogen, which might be because of the overlapping seasonal distribution of these  
45  
46 234 two pathogens.<sup>47</sup> Co-detection rates of HCoV-OC43, MP, HBoV, ADV, HRV, InfA, PIV2,  
47  
48 235 and PIV3 were over 5%, suggesting a broad range of respiratory pathogens could  
49  
50 236 co-exist with HMPV in ARI pediatric patients.

1  
2  
3  
4 237 HMPV most commonly causes URTI and LRTI in young children. The clinical  
5  
6 238 manifestations of HMPV-positive patients are similar to those of RSV-positive patients,  
7  
8 239 especially in young children.<sup>48-50</sup> In previous studies, the most frequent diagnoses of  
9  
10 240 children hospitalized with HMPV infection were pneumonitis and bronchiolitis.<sup>3 51 52</sup> In  
11  
12 241 some studies, bronchiolitis and recurrent wheezing/pneumonia were the main clinical  
13  
14 242 diagnoses,<sup>7 22 53 54</sup> while in other studies, bronchopneumonia, bronchiolitis, and  
15  
16 243 bronchial asthma exacerbation were the main clinical diagnoses.<sup>34</sup> Our study showed  
17  
18 244 that 66.7% (56/84), 9.5% (8/84) and 13.1% (11/84) of HMPV-positive patients were  
19  
20 245 diagnosed with bronchopneumonia, bronchiolitis, and pneumonia by chest  
21  
22 246 radiography, respectively. Of all the clinical features recorded, cough (100.0%,  
23  
24 247 101/101), abnormal pulmonary breath sound (91.1%, 92/101), fever (88.1%, 89/101),  
25  
26 248 expectoration (77.2%, 78/101), coryza (50.5%, 51/101), and wheezing (46.5%,  
27  
28 249 47/101) occurred frequently in HMPV-positive patients, similar to those reported  
29  
30 250 previously.<sup>16 29 52 55</sup>

31  
32  
33  
34  
35  
36  
37 251 Most of the HMPV-positive patients had a fever (88.1%, 89/101); it appeared  
38  
39 252 more frequently in patients with only HMPV detected than in the patients with HMPV  
40  
41 253 plus other pathogen(s) detected ( $p=0.037$ ). Diarrhea was not a major symptom in  
42  
43 254 HMPV-positive patients (7.0%, 7/101), but it had a higher prevalence in patients with  
44  
45 255 HMPV plus other pathogen(s) detected than in the patients with only HMPV detected  
46  
47 256 ( $p=0.018$ ), suggesting that diarrhea is probably caused by other pathogens. No  
48  
49 257 significant difference was found in the other clinical features between the patients with  
50  
51 258 only HMPV detected and the patients with HMPV plus other pathogen(s) detected,  
52  
53  
54  
55  
56  
57  
58  
59  
60

1  
2  
3 259 similar to the results of a previous study.<sup>51</sup>  
4  
5

6 260 In our study, RSV (36.8%, 7/19) was the most frequently co-detected pathogen  
7  
8 261 in HMPV-positive patients. Whether HMPV/RSV co-infection is more severe than the  
9  
10 262 respective mono-infections remains unclear. A previous study showed that children  
11  
12 263 with HMPV/RSV co-infection were more likely to develop pneumonia; however,  
13  
14 264 disease severity was not increased.<sup>53</sup> Conversely, Semple et al.<sup>56</sup> reported that  
15  
16 265 HMPV/RSV co-infection can cause more severe bronchiolitis in patients. In our study,  
17  
18 266 no significant difference in the diagnosis of pneumonia was observed between the  
19  
20 267 patients with only HMPV detected and the patients with HMPV plus other pathogen(s)  
21  
22 268 detected. It has been confirmed that a history of prematurity, particular age groups,  
23  
24 269 and the presence of chronic diseases increases the risk of severe LRTI among  
25  
26 270 HMPV- and RSV-infected children.<sup>51</sup> Our study suggests that the clinical  
27  
28 271 manifestations of HMPV infection are complex and diverse; our data will be helpful in  
29  
30 272 the diagnosis of HMPV.  
31  
32  
33  
34  
35  
36  
37

38 273 In this study, we analyzed the epidemiological characteristics and clinical  
39  
40 274 characteristics of HMPV in more than 5000 children with ARI in two tertiary hospitals  
41  
42 275 in Guangzhou, which is an international metropolis and the most important political,  
43  
44 276 economic and cultural center in southern China. Therefore, the results are not limited  
45  
46 277 to the two hospital cases, but also represent and reflect HMPV infection in children  
47  
48 278 with ARI in south China and play a positive role in the prevention and diagnosis of  
49  
50 279 HMPV infection in the area.  
51  
52  
53

54 280 The study had some limitations. First, collection of data on symptoms and  
55  
56  
57

1  
2  
3  
4 281 physical findings in infants and young children requires experienced medical staff,  
5  
6 282 patient's cooperation, and consent from the patient's guardian. Consequently, it is  
7  
8 283 possible we will have incomplete or even an inaccurate description of patients'  
9  
10 284 manifestations. Second, because our study mainly focused on HMPV, other common  
11  
12 285 respiratory pathogens, including bacterial pathogens, were not tested and  
13  
14 286 subsequently our study does not give a fully account of respiratory pathogen infection  
15  
16 287 in hospitalized pediatric patients with ARI. Third, the characteristics of HMPV-negative  
17  
18 288 patients and outcome data (discharge/death) were not analyzed further, because our  
19  
20 289 study only focused on the epidemiological and clinical features of HMPV positive  
21  
22 290 cases. This might affect our understanding of the clinical features of HMPV-positive  
23  
24 291 patients. Despite these shortcomings, our results provide a valuable insight into the  
25  
26 292 epidemiological and clinical characteristics of HMPV present in patients hospitalized  
27  
28 293 with ARI in Guangzhou, southern China.  
29  
30  
31  
32  
33  
34  
35  
36  
37  
38  
39  
40  
41  
42  
43  
44  
45  
46  
47  
48  
49  
50  
51  
52  
53  
54  
55  
56  
57  
58  
59  
60

1  
2  
3  
4 294 **Conclusions**

5  
6 295 HMPV is an important respiratory pathogen in children with ARI in Guangzhou ,  
7  
8 296 China, particularly in children under 5 years old. In future, our data can be used by  
9  
10 297 public health authorities and clinicians to improve the management of HMPV infection  
11  
12  
13 298 in children.  
14  
15  
16  
17  
18  
19  
20  
21  
22  
23  
24  
25  
26  
27  
28  
29  
30  
31  
32  
33  
34  
35  
36  
37  
38  
39  
40  
41  
42  
43  
44  
45  
46  
47  
48  
49  
50  
51  
52  
53  
54  
55  
56  
57  
58  
59  
60

For peer review only

1  
2  
3  
4 299 **Acknowledgements**  
5

6 300 We thank the study volunteers for their generous participation. We thank Yinghua  
7  
8 301 Zhou, Haiping Huang, Jing Zhang, and Jing Ma for technical assistance. We thank  
9  
10 302 Professor Xiaofeng Li and Dr. Zhengshi Lin for paper polishing.  
11  
12  
13 303

14  
15  
16 304 **Contributors**  
17

18 305 RZ, WKL, LZ and DLL designed the study. LZ, DLL, WKL, SYQ, DX, XL and LTT  
19  
20 306 performed pathogen testing. DHC and WPT collected the clinical data. All authors  
21  
22 307 participated in the data analysis. LZ, DLL, RZ and WKL drafted the manuscript. All  
23  
24 308 authors read and approved the final version of this manuscript.  
25  
26  
27

28 309  
29  
30 310 **Funding**  
31

32  
33 311 This study was supported by The State Major Infectious Disease Research Program  
34  
35 312 (RZ) (2017ZX10103011-003), National Natural Science Foundation of China (WKL)  
36  
37 313 (31500143), Guangzhou Science and Technology Program key projects (RZ)  
38  
39 314 (201508020252). The funders had no role in study design, data collection and  
40  
41 315 analysis, decision to publish, or preparation of the manuscript.  
42  
43  
44

45 316

46  
47 317 **Competing interests**  
48

49 318 None declared.  
50

51  
52 319

53  
54  
55 320 **Ethics approval**  
56

1  
2  
3 321 The study was approved by The First Affiliated Hospital of Guangzhou Medical  
4  
5  
6 322 University Ethics Committee. Informed written consent was obtained from parents or  
7  
8 323 legal guardians.  
9

10  
11 324

12  
13 325 **Data sharing statement**  
14

15  
16 326 No additional data are available.  
17

18 327  
19

20  
21 328  
22  
23  
24  
25  
26  
27  
28  
29  
30  
31  
32  
33  
34  
35  
36  
37  
38  
39  
40  
41  
42  
43  
44  
45  
46  
47  
48  
49  
50  
51  
52  
53  
54  
55  
56  
57  
58  
59  
60

329 **References**

- 330 1. van den Hoogen BG, Herfst S, Sprong L, et al. Antigenic and genetic  
331 variability of human metapneumoviruses. *Emerg Infect Dis* 2004;10(4):658-66.  
332 doi: 10.3201/eid1004.030393
- 333 2. van den Hoogen BG, de Jong JC, Groen J, et al. A newly discovered human  
334 pneumovirus isolated from young children with respiratory tract disease. *Nat*  
335 *Med* 2001;7(6):719-24. doi: 10.1038/89098
- 336 3. Boivin G, Abed Y, Pelletier G, et al. Virological features and clinical  
337 manifestations associated with human metapneumovirus: a new  
338 paramyxovirus responsible for acute respiratory-tract infections in all age  
339 groups. *J Infect Dis* 2002;186(9):1330-4. doi: 10.1086/344319
- 340 4. Falsey AR, Walsh EE. Viral pneumonia in older adults. *Clin Infect Dis*  
341 2006;42(4):518-24. doi: 10.1086/499955
- 342 5. Kahn JS. Epidemiology of human metapneumovirus. *Clin Microbiol Rev*  
343 2006;19(3):546-57. doi: 10.1128/CMR.00014-06
- 344 6. Davis CR, Stockmann C, Pavia AT, et al. Incidence, Morbidity, and Costs of  
345 Human Metapneumovirus Infection in Hospitalized Children. *J Pediatric Infect*  
346 *Dis Soc* 2016;5(3):303-11. doi: 10.1093/jpids/piv027
- 347 7. Edwards KM, Zhu Y, Griffin MR, et al. Burden of human metapneumovirus  
348 infection in young children. *N Engl J Med* 2013;368(7):633-43. doi:  
349 10.1056/NEJMoa1204630
- 350 8. Foulongne V, Guyon G, Rodiere M, et al. Human metapneumovirus infection



- 1  
2  
3  
4 351 in young children hospitalized with respiratory tract disease. *Pediatr Infect Dis*  
5  
6 352 *J* 2006;25(4):354-9. doi: 10.1097/01.inf.0000207480.55201.f6  
7  
8  
9 353 9. Heikkinen T, Osterback R, Peltola V, et al. Human metapneumovirus  
10  
11 354 infections in children. *Emerg Infect Dis* 2008;14(1):101-6. doi:  
12  
13 355 10.3201/eid1401.070251  
14  
15  
16 356 10. Nicholson KG, McNally T, Silverman M, et al. Rates of hospitalisation for  
17  
18 357 influenza, respiratory syncytial virus and human metapneumovirus among  
19  
20 358 infants and young children. *Vaccine* 2006;24(1):102-8. doi:  
21  
22 359 10.1016/j.vaccine.2005.02.004  
23  
24  
25 360 11. Sloots TP, Mackay IM, Bialasiewicz S, et al. Human metapneumovirus,  
26  
27 361 Australia, 2001-2004. *Emerg Infect Dis* 2006;12(8):1263-6. doi:  
28  
29 362 10.3201/eid1208.051239  
30  
31  
32  
33 363 12. Williams JV, Edwards KM, Weinberg GA, et al. Population-based incidence  
34  
35 364 of human metapneumovirus infection among hospitalized children. *J Infect Dis*  
36  
37 365 2010;201(12):1890-8. doi: 10.1086/652782  
38  
39  
40 366 13. Ebihara T, Endo R, Kikuta H, et al. Seroprevalence of human  
41  
42 367 metapneumovirus in Japan. *J Med Virol* 2003;70(2):281-3. doi:  
43  
44 368 10.1002/jmv.10391  
45  
46  
47 369 14. Panda S, Mohakud NK, Pena L, et al. Human metapneumovirus: review of  
48  
49 370 an important respiratory pathogen. *Int J Infect Dis* 2014;25:45-52. doi:  
50  
51 371 10.1016/j.ijid.2014.03.1394  
52  
53  
54  
55 372 15. Broor S, Bharaj P, Chahar HS. Human metapneumovirus: a new respiratory  
56  
57  
58  
59  
60

- 1  
2  
3  
4 373 pathogen. *J Biosci* 2008;33(4):483-93.  
5  
6 374 16. Jain B, Singh AK, Dangi T, et al. High prevalence of human  
7  
8 375 metapneumovirus subtype B in cases presenting as severe acute respiratory  
9  
10 376 illness: an experience at tertiary care hospital. *Clin Respir J* 2014;8(2):225-33.  
11  
12  
13 377 doi: 10.1111/crj.12064  
14  
15 378 17. Liu WK, Liu Q, Chen DH, et al. Epidemiology and clinical presentation of the  
16  
17 four human parainfluenza virus types. *BMC Infect Dis* 2013;13:28. doi:  
18 379  
19 10.1186/1471-2334-13-28  
20 380  
21  
22 381 18. Liu WK, Chen DH, Liu Q, et al. Detection of human bocavirus from children  
23  
24 and adults with acute respiratory tract illness in Guangzhou, southern China.  
25 382  
26  
27 *BMC Infect Dis* 2011;11:345. doi: 10.1186/1471-2334-11-345  
28 383  
29  
30 384 19. Liu W, Chen D, Tan W, et al. Epidemiology and Clinical Presentations of  
31  
32 Respiratory Syncytial Virus Subgroups A and B Detected with Multiplex  
33 385  
34 Real-Time PCR. *PLoS One* 2016;11(10):e0165108. DOI:  
35 386  
36 10.1371/journal.pone.0165108. doi: 10.1371/journal.pone.0165108  
37 387  
38  
39 388 20. Williams BG, Gouws E, Boschi-Pinto C, et al. Estimates of world-wide  
40  
41 distribution of child deaths from acute respiratory infections. *Lancet Infect Dis*  
42 389  
43 2002;2(1):25-32.  
44 390  
45  
46 391 21. Escobar C, Luchsinger V, de Oliveira DB, et al. Genetic variability of human  
47  
48 metapneumovirus isolated from Chilean children, 2003-2004. *J Med Virol*  
49 392  
50 2009;81(2):340-4. doi: 10.1002/jmv.21399  
51 393  
52  
53 394 22. Garcia-Garcia ML, Calvo C, Rey C, et al. Human metapneumovirus  
54  
55  
56  
57  
58  
59  
60

- 1  
2  
3  
4 395 infections in hospitalized children and comparison with other respiratory  
5  
6 396 viruses. 2005-2014 prospective study. *PLoS One* 2017;12(3):e0173504. DOI:  
7  
8 397 10.1371/journal.pone.04. doi: 10.1371/journal.pone.0173504  
9  
10  
11 398 23. Ljubin-Sternak S, Santak M, Cepin-Bogovic J, et al. Detection of genetic  
12  
13 399 lineages of human metapneumovirus in Croatia during the winter season  
14  
15 400 2005/2006. *J Med Virol* 2008;80(7):1282-7. doi: 10.1002/jmv.21196  
16  
17  
18 401 24. McCracken JP, Arvelo W, Ortiz J, et al. Comparative epidemiology of human  
19  
20 402 metapneumovirus- and respiratory syncytial virus-associated hospitalizations  
21  
22 403 in Guatemala. *Influenza Other Respir Viruses* 2014;8(4):414-21. doi:  
23  
24 404 10.1111/irv.12251  
25  
26  
27  
28 405 25. Nor'e SS, Sam IC, Mohamad Fakri EF, et al. Phylogenetic analysis of human  
29  
30 406 metapneumovirus among children with acute respiratory infections in Kuala  
31  
32 407 Lumpur, Malaysia. *Trop Biomed* 2014;31(3):562-6.  
33  
34  
35 408 26. Ordas J, Boga JA, Alvarez-Arguelles M, et al. Role of metapneumovirus in  
36  
37 409 viral respiratory infections in young children. *J Clin Microbiol*  
38  
39 410 2006;44(8):2739-42. doi: 10.1128/JCM.00164-06  
40  
41  
42 411 27. Rafiefard F, Yun Z, Orvell C. Epidemiologic characteristics and seasonal  
43  
44 412 distribution of human metapneumovirus infections in five epidemic seasons in  
45  
46 413 Stockholm, Sweden, 2002-2006. *J Med Virol* 2008;80(9):1631-8. doi:  
47  
48 414 10.1002/jmv.21242  
49  
50  
51  
52 415 28. Rodriguez PE, Adamo MP, Paglini MG, et al. [Mono-infection of human  
53  
54 416 Metapneumovirus in Cordoba: first clinical and epidemiological research in  
55  
56  
57  
58  
59  
60

- 1  
2  
3  
4 417 children with respiratory infection in 2011]. *Rev Fac Cien Med Univ Nac*  
5  
6 418 *Cordoba* 2016;73(3):170-75.  
7  
8 419 29. Zeng SZ, Xiao NG, Zhong LL, et al. Clinical features of human  
9  
10 420 metapneumovirus genotypes in children with acute lower respiratory tract  
11  
12 421 infection in Changsha, China. *J Med Virol* 2015;87(11):1839-45. doi:  
13  
14 422 10.1002/jmv.24249  
15  
16 423 30. Zhu RN, Qian Y, Zhao LQ, et al. Characterization of human  
17  
18 424 metapneumovirus from pediatric patients with acute respiratory infections in a  
19  
20 425 4-year period in Beijing, China. *Chin Med J (Engl)* 2011;124(11):1623-8.  
21  
22 426 31. Cai XY, Wang Q, Lin GY, et al. Respiratory virus infections among children in  
23  
24 427 South China. *J Med Virol* 2014;86(7):1249-55. doi: 10.1002/jmv.23931  
25  
26 428 32. Matsuzaki Y, Itagaki T, Abiko C, et al. Clinical impact of human  
27  
28 429 metapneumovirus genotypes and genotype-specific seroprevalence in  
29  
30 430 Yamagata, Japan. *J Med Virol* 2008;80(6):1084-9. doi: 10.1002/jmv.21194  
31  
32 431 33. Barbosa Ramirez J, Pulido Dominguez P, Rey Benito G, et al. Human  
33  
34 432 respiratory syncytial virus and metapneumovirus in patients with acute  
35  
36 433 respiratory infection in Colombia, 2000 - 2011. *Rev Panam Salud Publica*  
37  
38 434 2014;36(2):101-9.  
39  
40 435 34. Zhang C, Du LN, Zhang ZY, et al. Detection and genetic diversity of human  
41  
42 436 metapneumovirus in hospitalized children with acute respiratory infections in  
43  
44 437 Southwest China. *J Clin Microbiol* 2012;50(8):2714-9. doi:  
45  
46 438 10.1128/JCM.00809-12  
47  
48  
49  
50  
51  
52  
53  
54  
55  
56  
57  
58  
59  
60

- 1  
2  
3  
4 439 35. McAdam AJ, Hasenbein ME, Feldman HA, et al. Human metapneumovirus in  
5  
6 440 children tested at a tertiary-care hospital. *J Infect Dis* 2004;190(1):20-6. doi:  
7  
8 441 10.1086/421120  
9  
10  
11 442 36. Boivin G, De Serres G, Cote S, et al. Human metapneumovirus infections in  
12  
13 443 hospitalized children. *Emerg Infect Dis* 2003;9(6):634-40. doi:  
14  
15 444 10.3201/eid0906.030017  
16  
17  
18 445 37. Maggi F, Pifferi M, Vatteroni M, et al. Human metapneumovirus associated  
19  
20 446 with respiratory tract infections in a 3-year study of nasal swabs from infants in  
21  
22 447 Italy. *J Clin Microbiol* 2003;41(7):2987-91.  
23  
24  
25 448 38. van den Hoogen BG, van Doornum GJ, Fockens JC, et al. Prevalence and  
26  
27 449 clinical symptoms of human metapneumovirus infection in hospitalized  
28  
29 450 patients. *J Infect Dis* 2003;188(10):1571-7. doi: 10.1086/379200  
30  
31  
32 451 39. Peiris JS, Tang WH, Chan KH, et al. Children with respiratory disease  
33  
34 452 associated with metapneumovirus in Hong Kong. *Emerg Infect Dis*  
35  
36 453 2003;9(6):628-33. doi: 10.3201/eid0906.030009  
37  
38  
39 454 40. Greensill J, McNamara PS, Dove W, et al. Human metapneumovirus in  
40  
41 455 severe respiratory syncytial virus bronchiolitis. *Emerg Infect Dis*  
42  
43 456 2003;9(3):372-5. doi: 10.3201/eid0903.020289  
44  
45  
46 457 41. Lin PY, Lin TY, Huang YC, et al. Human metapneumovirus and  
47  
48 458 community-acquired pneumonia in children. *Chang Gung Med J*  
49  
50 459 2005;28(10):683-8.  
51  
52  
53 460 42. Ghattas C, Mossad SB. Fatal human metapneumovirus and influenza B virus  
54  
55  
56  
57  
58  
59  
60

- 1  
2  
3  
4 461 coinfection in an allogeneic hematopoietic stem cell transplant recipient.  
5  
6 462 *Transpl Infect Dis* 2012;14(5):E41-3.DOI: 10.1111/j.1399-3062.2012.00766.x.  
7  
8 463 doi: 10.1111/j.1399-3062.2012.00766.x  
9  
10  
11 464 43. Fathima S, Lee BE, May-Hadford J, et al. Use of an innovative web-based  
12  
13 465 laboratory surveillance platform to analyze mixed infections between human  
14  
15 466 metapneumovirus (hMPV) and other respiratory viruses circulating in Alberta  
16  
17 467 (AB), Canada (2009-2012). *Viruses* 2012;4(11):2754-65. doi:  
18  
19 468 10.3390/v4112754  
20  
21  
22  
23 469 44. Kaida A, Kubo H, Goto K, et al. Co-infection of human metapneumovirus with  
24  
25 470 adenovirus or respiratory syncytial virus among children in Japan. *Microbiol*  
26  
27 471 *Immunol* 2007;51(7):679-83.  
28  
29  
30 472 45. Pilger DA, Cantarelli VV, Amantea SL, et al. Detection of human bocavirus  
31  
32 473 and human metapneumovirus by real-time PCR from patients with respiratory  
33  
34 474 symptoms in Southern Brazil. *Mem Inst Oswaldo Cruz* 2011;106(1):56-60.  
35  
36  
37  
38 475 46. Esposito S, Daleno C, Prunotto G, et al. Impact of viral infections in children  
39  
40 476 with community-acquired pneumonia: results of a study of 17 respiratory  
41  
42 477 viruses. *Influenza Other Respir Viruses* 2013;7(1):18-26. doi:  
43  
44 478 10.1111/j.1750-2659.2012.00340.x  
45  
46  
47  
48 479 47. Kahn JS. Newly discovered respiratory viruses: significance and implications.  
49  
50 480 *Curr Opin Pharmacol* 2007;7(5):478-83. doi: 10.1016/j.coph.2007.07.004  
51  
52  
53 481 48. Wolf DG, Greenberg D, Kalkstein D, et al. Comparison of human  
54  
55 482 metapneumovirus, respiratory syncytial virus and influenza A virus lower  
56  
57  
58  
59  
60

- 1  
2  
3  
4 483 respiratory tract infections in hospitalized young children. *Pediatr Infect Dis J*  
5  
6 484 2006;25(4):320-4. doi: 10.1097/01.inf.0000207395.80657.cf  
7  
8 485 49. Wilkesmann A, Schildgen O, Eis-Hubinger AM, et al. Human  
9  
10 486 metapneumovirus infections cause similar symptoms and clinical severity as  
11  
12 487 respiratory syncytial virus infections. *Eur J Pediatr* 2006;165(7):467-75. doi:  
13  
14 488 10.1007/s00431-006-0105-4  
15  
16 489 50. Adams O, Weis J, Jasinska K, et al. Comparison of human  
17  
18 490 metapneumovirus, respiratory syncytial virus and Rhinovirus respiratory tract  
19  
20 491 infections in young children admitted to hospital. *J Med Virol*  
21  
22 492 2015;87(2):275-80. doi: 10.1002/jmv.24025  
23  
24 493 51. Moe N, Krokstad S, Stenseng IH, et al. Comparing Human Metapneumovirus  
25  
26 494 and Respiratory Syncytial Virus: Viral Co-Detections, Genotypes and Risk  
27  
28 495 Factors for Severe Disease. *PLoS One* 2017;12(1):e0170200.DOI:  
29  
30 496 10.1371/journal.pone.00. doi: 10.1371/journal.pone.0170200  
31  
32 497 52. Yan XL, Li YN, Tang YJ, et al. Clinical characteristics and viral load of  
33  
34 498 respiratory syncytial virus and human metapneumovirus in children hospitalized  
35  
36 499 for acute lower respiratory tract infection. *J Med Virol* 2017;89(4):589-97. doi:  
37  
38 500 10.1002/jmv.24687  
39  
40 501 53. Caracciolo S, Minini C, Colombrita D, et al. Human metapneumovirus  
41  
42 502 infection in young children hospitalized with acute respiratory tract disease:  
43  
44 503 virologic and clinical features. *Pediatr Infect Dis J* 2008;27(5):406-12. doi:  
45  
46 504 10.1097/INF.0b013e318162a164  
47  
48  
49  
50  
51  
52  
53  
54  
55  
56  
57  
58  
59  
60

- 1  
2  
3  
4 505 54. Williams JV, Harris PA, Tollefson SJ, et al. Human metapneumovirus and  
5  
6 506 lower respiratory tract disease in otherwise healthy infants and children. *N*  
7  
8 507 *Engl J Med* 2004;350(5):443-50. doi: 10.1056/NEJMoa025472  
9  
10  
11 508 55. Schuster JE, Khuri-Bulos N, Faouri S, et al. Human Metapneumovirus  
12  
13 509 Infection in Jordanian Children: Epidemiology and Risk Factors for Severe  
14  
15 510 Disease. *Pediatr Infect Dis J* 2015;34(12):1335-41. doi:  
16  
17 511 10.1097/INF.0000000000000892  
18  
19  
20 512 56. Semple MG, Cowell A, Dove W, et al. Dual infection of infants by human  
21  
22 513 metapneumovirus and human respiratory syncytial virus is strongly associated  
23  
24 514 with severe bronchiolitis. *J Infect Dis* 2005;191(3):382-6. doi: 10.1086/426457  
25  
26  
27  
28 515



1  
2  
3  
4 516 **Figure legends**

5  
6 517

7  
8 518 **Figure 1** Age distributions of patients with HMPV.

9  
10  
11 519 <sup>a</sup>Date were presented as HMPV positive rate (number of HMPV-positive  
12 patients/number of patients in each age group); m: month(s); y: year(s).

13  
14  
15  
16 521

17  
18 522 **Figure 2** Seasonal distribution of HMPV infection in pediatric patients hospitalized with  
19 acute respiratory infection from July 2013 to June 2016 in Guangzhou.  
20  
21 523

524

**Table 1. Distribution of co-pathogens in 19 HMPV-positive patients**

| Co-pathogens <sup>a</sup> | Patient No. |
|---------------------------|-------------|
| RSV/HMPV                  | 4           |
| HCoV-OC43/HMPV            | 3           |
| ADV/HMPV                  | 2           |
| HRV/HMPV                  | 2           |
| MP/HMPV                   | 1           |
| PIV2/HMPV                 | 1           |
| PIV3/HMPV                 | 1           |
| RSV/MP/HMPV               | 1           |
| RSV/InfA/HMPV             | 1           |
| RSV/HBoV/HMPV             | 1           |
| MP/HBoV/HMPV              | 1           |
| InfA/HBoV/HMPV            | 1           |

525 <sup>a</sup>HMPV-positive patients were tested for 17 common respiratory pathogens.

526 RSV: respiratory syncytial virus; PIV: parainfluenza virus; InfA: influenza A virus; ADV:

527 adenovirus; HCoV: human coronaviruses; HRV: human rhinovirus; HBoV: human

528 bocavirus; MP: *Mycoplasma pneumoniae*.

529 Influenza B viruses, parainfluenza virus types 1 and 4, enterovirus, human

530 coronaviruses-HKU1, human coronaviruses-229E, human coronaviruses-NL63, and

531 *Chlamydomphila pneumoniae* were not detected.

532

533

**Table 2. Clinical presentations of HMPV-positive patients**

| Diagnosis/Symptom                               | Total HMPV<br>(n=101) | Patients with only HMPV and HMPV<br>plus other pathogen(s) detected. |                         |                         |
|-------------------------------------------------|-----------------------|----------------------------------------------------------------------|-------------------------|-------------------------|
|                                                 |                       | Single HMPV<br>(n = 83)                                              | Co-pathogens<br>(n= 18) | p<br>value <sup>b</sup> |
| <b>Upper respiratory tract infection</b>        |                       |                                                                      |                         |                         |
| Nasal obstruction                               | 40(39.6)              | 34(41.0)                                                             | 6(33.3)                 | 0.605                   |
| Coryza                                          | 51(50.5)              | 44(53.0)                                                             | 7(38.9)                 | 0.309                   |
| Sneeze                                          | 1(1.0)                | 1(1.2)                                                               | 0(0)                    | — <sup>c</sup>          |
| Cough                                           | 101(100)              | 83(100)                                                              | 18(100)                 | — <sup>d</sup>          |
| Expectoration                                   | 78(77.2)              | 66(79.5)                                                             | 12(66.7)                | 0.351                   |
| Hoarseness                                      | 1(1.0)                | 1(1.2)                                                               | 0(0)                    | — <sup>c</sup>          |
| <b>Lower respiratory tract infection</b>        |                       |                                                                      |                         |                         |
| Abnormal pulmonary<br>breath sound <sup>a</sup> | 92(91.1)              | 75(90.4)                                                             | 17(94.4)                | 0.582                   |
| Wheezing                                        | 47(46.5)              | 40(48.2)                                                             | 7(38.9)                 | 0.473                   |
| Anhelation                                      | 24(23.8)              | 21(25.3)                                                             | 3(16.7)                 | 0.551                   |
| Increasing lung markings <sup>e</sup>           | 6(7.1)                | 4(5.8)                                                               | 2(13.3)                 | 0.304                   |
| Bronchiolitis <sup>e</sup>                      | 8(9.5)                | 7(10.1)                                                              | 1(6.7)                  | 0.677                   |
| Pneumonia <sup>e</sup>                          | 11(13.1)              | 10(14.5)                                                             | 1(6.7)                  | 0.415                   |
| Bronchopneumonia <sup>e</sup>                   | 56(66.7)              | 46(66.7)                                                             | 10(66.7)                | 0.626                   |
| <b>Systemic influenza-like symptoms</b>         |                       |                                                                      |                         |                         |
| Fever (≥38°C)                                   | 89(88.1)              | 76(91.6)                                                             | 13(72.2)                | <b>0.037</b>            |
| Chill                                           | 7(6.9)                | 6(7.2)                                                               | 1(5.6)                  | 0.8                     |
| Debilitation                                    | 11(10.9)              | 11(13.3)                                                             | 0(0)                    | — <sup>c</sup>          |
| <b>Gastrointestinal illness</b>                 |                       |                                                                      |                         |                         |
| Vomiting                                        | 21(20.8)              | 16(19.3)                                                             | 5(27.8)                 | 0.522                   |
| Poor appetite                                   | 19(18.8)              | 17(20.5)                                                             | 2(11.1)                 | 0.513                   |
| Diarrhea                                        | 7(7.0)                | 3(3.6)                                                               | 4(22.2)                 | <b>0.018</b>            |

534 Data are presented as No. (%) of each group.

535 Percentages sum to >100% because some patients had >1 clinical presentations.

536 <sup>a</sup>Including phlegmatic, wheezing, bubbling, and moist rales.

537 <sup>b</sup>Two-tailed  $\chi^2$  test comparing the distribution of each illness or diagnosis between  
538 patients with only HMPV and HMPV plus other pathogen(s) detected.

539 <sup>c</sup>Not tested because the number of positive samples obtained was too small.

540 <sup>d</sup>Not tested because the prevalence was 100%.

541 <sup>e</sup>Diagnosed by chest radiography, and a total of 84 HMPV-positive patients (69

1  
2  
3 542 patients with only HMPV detected and 15 patients with HMPV plus other pathogen(s)  
4  
5 543 detected) were examined.  
6  
7  
8  
9  
10  
11  
12  
13  
14  
15  
16  
17  
18  
19  
20  
21  
22  
23  
24  
25  
26  
27  
28  
29  
30  
31  
32  
33  
34  
35  
36  
37  
38  
39  
40  
41  
42  
43  
44  
45  
46  
47  
48  
49  
50  
51  
52  
53  
54  
55  
56  
57  
58  
59  
60

For peer review only

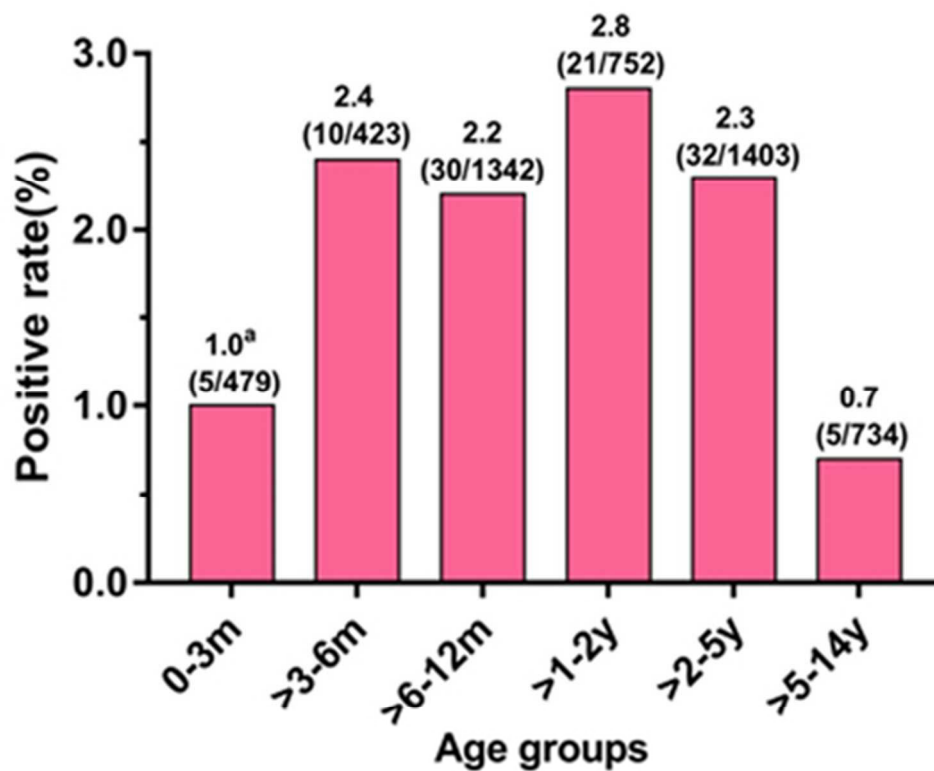

Figure 1 Age distributions of patients with HMPV.

<sup>a</sup>Data were presented as HMPV positive rate (number of HMPV-positive patients/number of patients in each age group); m: month(s); y: year(s).

42x35mm (300 x 300 DPI)

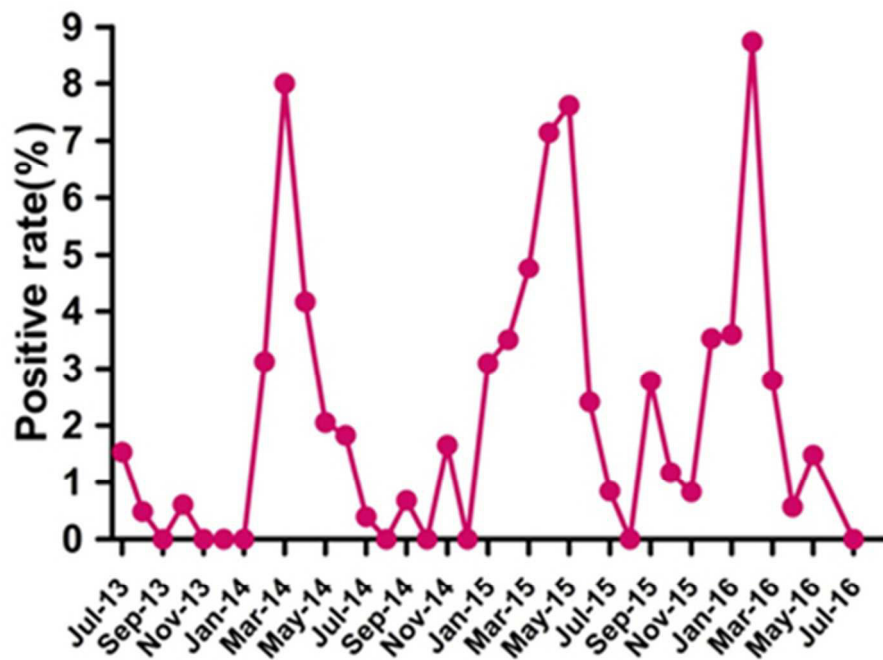

Figure 2 Seasonal distribution of HMPV infection in pediatric patients hospitalized with acute respiratory infection from July 2013 to June 2016 in Guangzhou.

39x31mm (300 x 300 DPI)

**STROBE 2007 (v4)Statement—Checklist of items that should be included in reports of *cross-sectional studies***

| Section/Topic                | Item # | Recommendation                                                                                                                                                                       | Reported on page # |
|------------------------------|--------|--------------------------------------------------------------------------------------------------------------------------------------------------------------------------------------|--------------------|
| <b>Title and abstract</b>    | 1      | (a) Indicate the study’s design with a commonly used term in the title or the abstract                                                                                               | 1                  |
|                              |        | (b) Provide in the abstract an informative and balanced summary of what was done and what was found                                                                                  | 2-3                |
| <b>Introduction</b>          |        |                                                                                                                                                                                      |                    |
| Background/rationale         | 2      | Explain the scientific background and rationale for the investigation being reported                                                                                                 | 4                  |
| Objectives                   | 3      | State specific objectives, including any prespecified hypotheses                                                                                                                     | 4-5                |
| <b>Methods</b>               |        |                                                                                                                                                                                      |                    |
| Study design                 | 4      | Present key elements of study design early in the paper                                                                                                                              | 6                  |
| Setting                      | 5      | Describe the setting, locations, and relevant dates, including periods of recruitment, exposure, follow-up, and data collection                                                      | 6                  |
| Participants                 | 6      | (a) Give the eligibility criteria, and the sources and methods of selection of participants                                                                                          | 6                  |
| Variables                    | 7      | Clearly define all outcomes, exposures, predictors, potential confounders, and effect modifiers. Give diagnostic criteria, if applicable                                             | 6-7                |
| Data sources/<br>measurement | 8*     | For each variable of interest, give sources of data and details of methods of assessment (measurement). Describe comparability of assessment methods if there is more than one group | 7                  |
| Bias                         | 9      | Describe any efforts to address potential sources of bias                                                                                                                            | 6                  |
| Study size                   | 10     | Explain how the study size was arrived at                                                                                                                                            | 6                  |
| Quantitative variables       | 11     | Explain how quantitative variables were handled in the analyses. If applicable, describe which groupings were chosen and why                                                         | 7-8                |
| Statistical methods          | 12     | (a) Describe all statistical methods, including those used to control for confounding                                                                                                | 8                  |
|                              |        | (b) Describe any methods used to examine subgroups and interactions                                                                                                                  | 8                  |
|                              |        | (c) Explain how missing data were addressed                                                                                                                                          | 7                  |
|                              |        | (d) If applicable, describe analytical methods taking account of sampling strategy                                                                                                   | 8                  |
|                              |        | (e) Describe any sensitivity analyses                                                                                                                                                |                    |
| <b>Results</b>               |        |                                                                                                                                                                                      |                    |

|                          |     |                                                                                                                                                                                                              |       |
|--------------------------|-----|--------------------------------------------------------------------------------------------------------------------------------------------------------------------------------------------------------------|-------|
| Participants             | 13* | (a) Report numbers of individuals at each stage of study—eg numbers potentially eligible, examined for eligibility, confirmed eligible, included in the study, completing follow-up, and analysed            | 9     |
|                          |     | (b) Give reasons for non-participation at each stage                                                                                                                                                         | 10    |
|                          |     | (c) Consider use of a flow diagram                                                                                                                                                                           |       |
| Descriptive data         | 14* | (a) Give characteristics of study participants (eg demographic, clinical, social) and information on exposures and potential confounders                                                                     | 9-11  |
|                          |     | (b) Indicate number of participants with missing data for each variable of interest                                                                                                                          | 9     |
| Outcome data             | 15* | Report numbers of outcome events or summary measures                                                                                                                                                         | 9-11  |
| Main results             | 16  | (a) Give unadjusted estimates and, if applicable, confounder-adjusted estimates and their precision (eg, 95% confidence interval). Make clear which confounders were adjusted for and why they were included | 9-11  |
|                          |     | (b) Report category boundaries when continuous variables were categorized                                                                                                                                    | 9-10  |
|                          |     | (c) If relevant, consider translating estimates of relative risk into absolute risk for a meaningful time period                                                                                             |       |
| Other analyses           | 17  | Report other analyses done—eg analyses of subgroups and interactions, and sensitivity analyses                                                                                                               |       |
| <b>Discussion</b>        |     |                                                                                                                                                                                                              |       |
| Key results              | 18  | Summarise key results with reference to study objectives                                                                                                                                                     | 12-15 |
| Limitations              | 19  | Discuss limitations of the study, taking into account sources of potential bias or imprecision. Discuss both direction and magnitude of any potential bias                                                   | 15-16 |
| Interpretation           | 20  | Give a cautious overall interpretation of results considering objectives, limitations, multiplicity of analyses, results from similar studies, and other relevant evidence                                   | 12-16 |
| Generalisability         | 21  | Discuss the generalisability (external validity) of the study results                                                                                                                                        | 12-16 |
| <b>Other information</b> |     |                                                                                                                                                                                                              |       |
| Funding                  | 22  | Give the source of funding and the role of the funders for the present study and, if applicable, for the original study on which the present article is based                                                | 18    |

\*Give information separately for cases and controls in case-control studies and, if applicable, for exposed and unexposed groups in cohort and cross-sectional studies.

**Note:** An Explanation and Elaboration article discusses each checklist item and gives methodological background and published examples of transparent reporting. The STROBE checklist is best used in conjunction with this article (freely available on the Web sites of PLoS Medicine at <http://www.plosmedicine.org/>, Annals of Internal Medicine at <http://www.annals.org/>, and Epidemiology at <http://www.epidem.com/>). Information on the STROBE Initiative is available at [www.strobe-statement.org](http://www.strobe-statement.org).
